# Supplementary material for: Simple inorganic base promoted C–N and C–C formation: synthesis of benzo[4,5]imidazo[1,2-a]pyridines as functional AIEgens used for detecting picric acid
Source: Royal Society of Chemistry journal article supplement (doi:10.1039/d1ob01424b), 2021-01-01
Supplement: d1ob01424b1.pdf [file d1ob01424b1.pdf]

# Electronic Supplementary Information

## Simple inorganic base promoted C-N and C-C formation: Synthesis of benzo[4,5]imidazo[1,2-a]pyridines as functional AIEgen used for detecting picric acid

Kai Yang<sup>a,b</sup> Shi-He Luo<sup>\*a</sup> Si-Hong Chen<sup>a</sup> Xi-Ying Cao<sup>a</sup> Yong-Jun Zhou<sup>a</sup> Yan-Lan Lin<sup>a</sup> Yan-Ping Huo<sup>\*c</sup> and Zhao-Yang Wang<sup>\*a</sup>

<sup>a</sup> School of Chemistry, South China Normal University, Key Laboratory of Theoretical Chemistry of Environment, Ministry of Education, Guangzhou 510006, P. R. China.

<sup>b</sup> College of pharmacy, Gannan Medical University, Ganzhou 341000, P. R. China.

<sup>c</sup> School of Chemical Engineering and Light Industry, Guangdong University of Technology, Guangzhou, 510006, China.

*E-mail:* wangzy@scnu.edu.cn, pinky\_r@163.com, yphuo@gdut.edu.cn; *Fax:* (+86) 20-39310187; *Tel.:* (+86) 20-39310258

### Table of Contents

|                                                                                                                                                 |         |
|-------------------------------------------------------------------------------------------------------------------------------------------------|---------|
| General Information.....                                                                                                                        | [2]     |
| Experimental Procedure for Compounds <b>1b-1u</b> .....                                                                                         | [3]     |
| Experimental Procedure for Compounds <b>3a-3n</b> and <b>4a-4k</b> .....                                                                        | [5]     |
| Photophysical Properties of compounds <b>3a</b> , <b>3e</b> , <b>3f</b> , <b>3g</b> , <b>3n</b> and <b>4c</b> ( <b>Figures S1-S21</b> ).....    | [6-15]  |
| Fluorescence Responses of <b>3b</b> to NAEs ( <b>Figures S22-S23</b> , <b>Table S1</b> ).....                                                   | [16-18] |
| Data of Single-crystal X-ray Analysis ( <b>Figures S24-S28</b> , <b>Table S2-S6</b> ).....                                                      | [19-23] |
| Characterization Data for All Products <b>3a-3o</b> , <b>4a-4l</b> , <b>3aa</b> and <b>3ab</b> .....                                            | [24-30] |
| <sup>1</sup> H, <sup>13</sup> C and <sup>19</sup> F NMR Spectra for All Compounds <b>3a-3o</b> , <b>4a-4l</b> , <b>3aa</b> and <b>3ab</b> ..... | [31-60] |
| References.....                                                                                                                                 | [61]    |

## General Information

Melting point was performed on an X-5 digital melting point apparatus without correcting.  $^1\text{H}$ ,  $^{13}\text{C}$  and  $^{19}\text{F}$  NMR spectra were collected on a Varian AS600 spectrometer in  $\text{CDCl}_3$  using tetramethylsilane (TMS) as an internal standard. The fluorescence spectra were recorded with a Hitachi F-4600 spectrophotometer at room temperature.

High-resolution mass spectra (HRMS) were obtained with a LCMS-IT-TOF mass spectrometer. Single-crystal X-ray analysis was obtained using Bruker APEX2 Smart CCD. Reactions were monitored using thin-layer chromatography (TLC) and visualized with UV light at 254 or 365 nm.

UV-*vis* absorption spectra were obtained with Shimadzu UV-2700 spectrophotometer at room temperature. Absolute PL quantum yields ( $\Phi_{\text{F}}$ ) were measured by Edinburgh FLS 980 fluorescence spectrometer with a calibrated integrating sphere. Dynamic light scattering (DLS) experiments were performed on Malvern Zetasizer Nano ZS90.

All reagents and solvents were purchased from commercial sources and used without further purification. 2-Substituted benzimidazoles **1** (except for **1a**) were synthesized from *o*-phenylenediamines and various acids according to the literature procedure<sup>[1, 2]</sup> (see the following for details).

## Experimental Procedure for Compounds 1b-1z

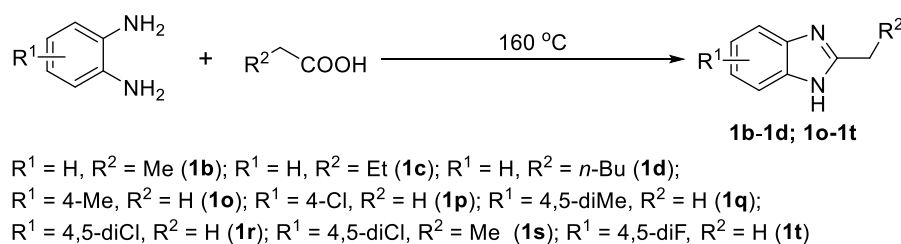

According to the reported procedure<sup>[1]</sup>, compounds **1b-1d** and **1o-1t** were synthesized. The appropriate aromatic diamine (2.0 mmol, 1.0 equiv.) and carboxylic acid (10 equiv.) were heated in a sealed tube at 160 °C for 6 h. The reaction mixture was cooled to room temperature and ammonia solution was added. The mixture was cooled in ice until precipitate was formed. The resulting solid was recrystallised from aqueous ethanol to give the desired compound **1**.

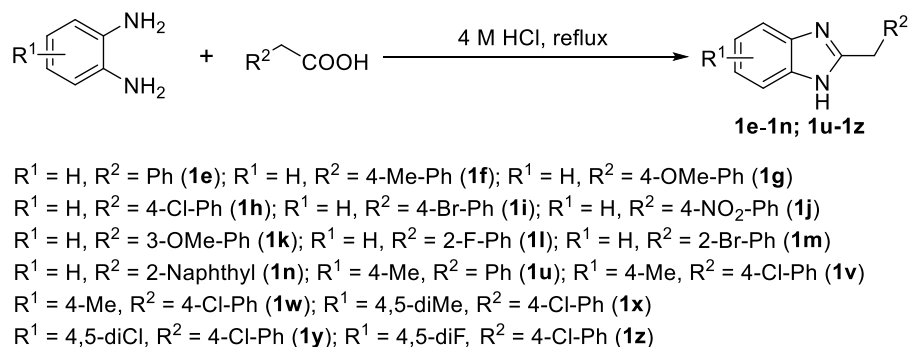

According to the reported procedure<sup>[2]</sup>, compounds **1e-1n** and **1u-1z** were synthesized. A mixture of appropriate aromatic diamine (2.0 mmol, 1.0 equiv) and carboxylic acid (1.5 equiv) in 4 M HCl (20.0 mL) was refluxed for 6 h. After monitoring the end of the reaction on TLC, the mixture was cooled to room temperature and neutralized by ammonia solution. And the mixture was cooled in ice until precipitate was formed. The resulting solid was recrystallised from aqueous ethanol to give the desired compound **1**.

## Experimental Procedure for Compounds 3a-3n and 4a-4k

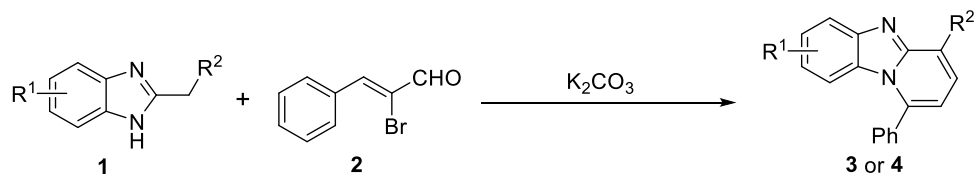

The mixture of 2-substituted 1H-benzo[d]imidazole **1** (0.30 mmol),  $K_2CO_3$  (0.75 mmol), and  $\alpha$ -bromocinnamaldehyde **2** (0.45 mmol) in DMF (2 mL) was stirred at 140 °C (or 120 °C) for 12 h. After the completion of the reaction, the reaction mixture was quenched with  $H_2O$  (15 mL) and extracted with dichloromethane ( $3 \times 15$  mL). Then, the organic layer was dried over anhydrous  $Na_2SO_4$ . After filtration and evaporation of the solvents under reduced pressure, the crude product was purified by column chromatography on silica gel to afford the desired product **3** or **4**.

**Photophysical Properties of Compounds 3a, 3e, 3f, 3g, 3n and 4c (Figures S1-S21)**

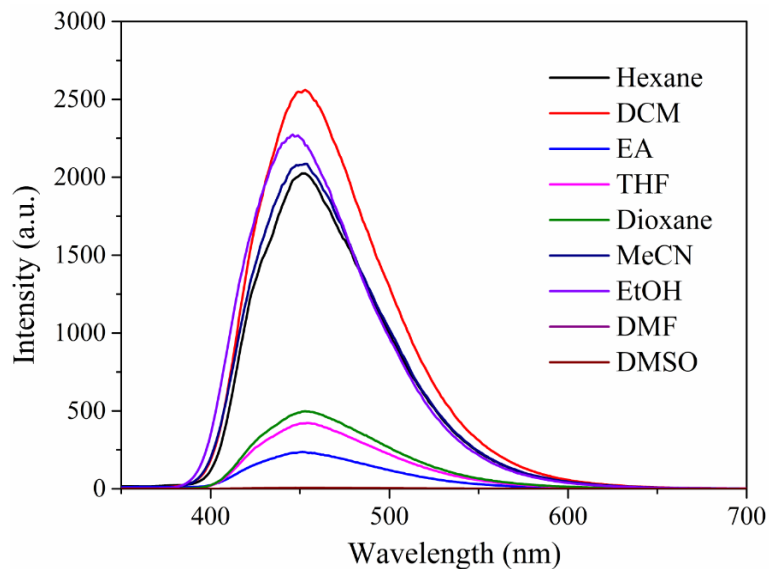

**Figure S1** Emission spectra of compound **3b** in different solvents ( $c = 10 \mu\text{M}$ ,  $\lambda_{\text{ex}} = 252 \text{ nm}$ ).

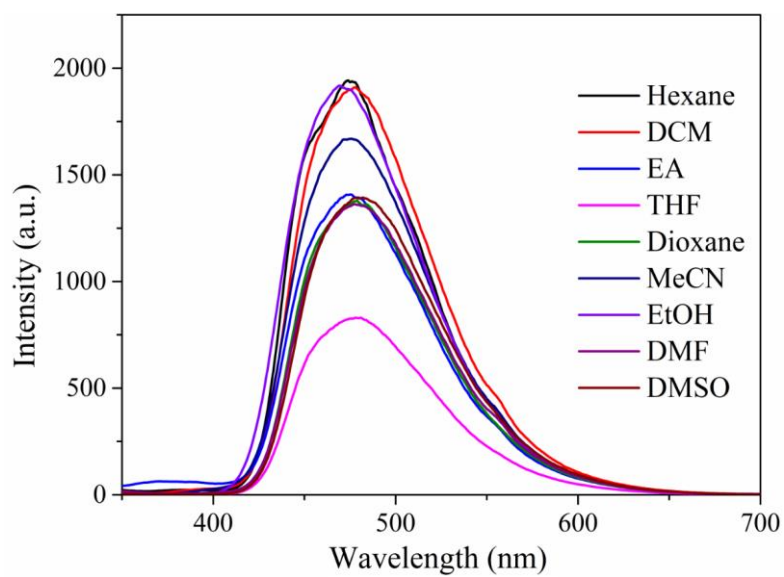

**Figure S2** Emission spectra of compound **3e** in different solvents ( $c = 10 \mu\text{M}$ ,  $\lambda_{\text{ex}} = 278 \text{ nm}$ ).

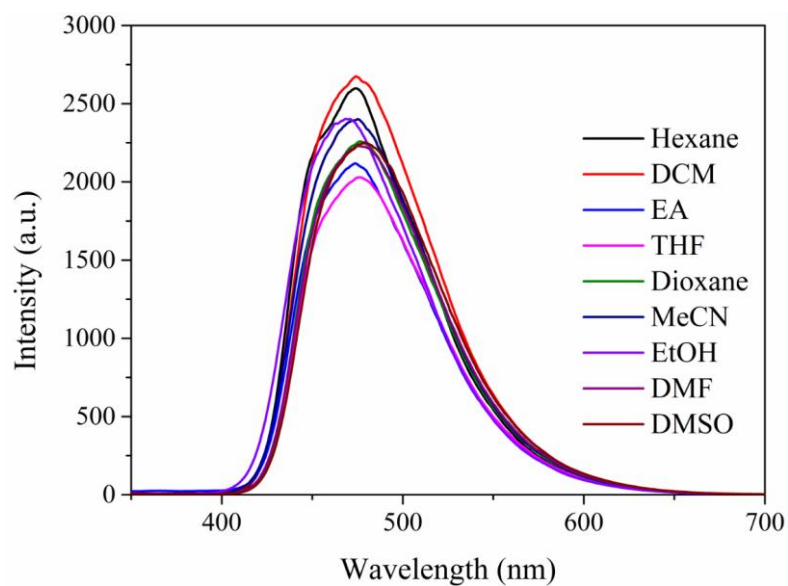

**Figure S3** Emission spectra of compound **3f** in different solvents ( $c = 10 \mu\text{M}$ ,  $\lambda_{\text{ex}} = 289 \text{ nm}$ ).

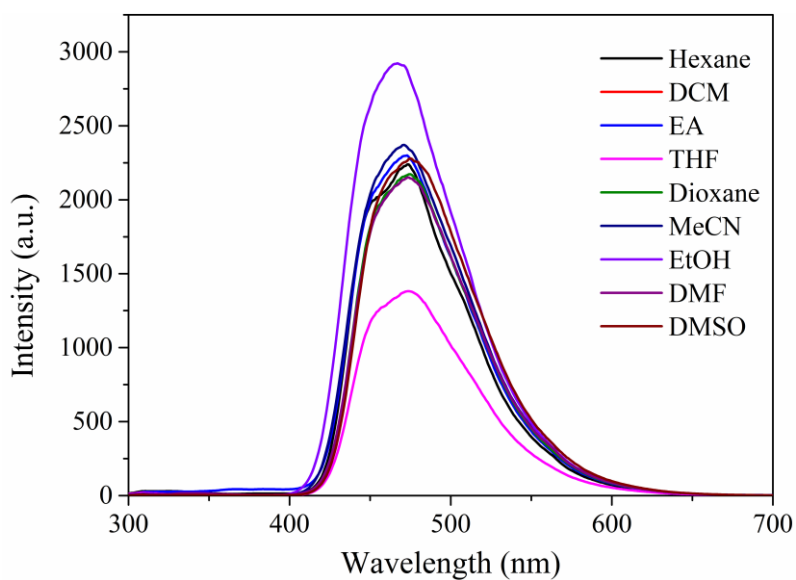

**Figure S4** Emission spectra of compound **3g** in different solvents ( $c = 10 \mu\text{M}$ ,  $\lambda_{\text{ex}} = 281 \text{ nm}$ ).

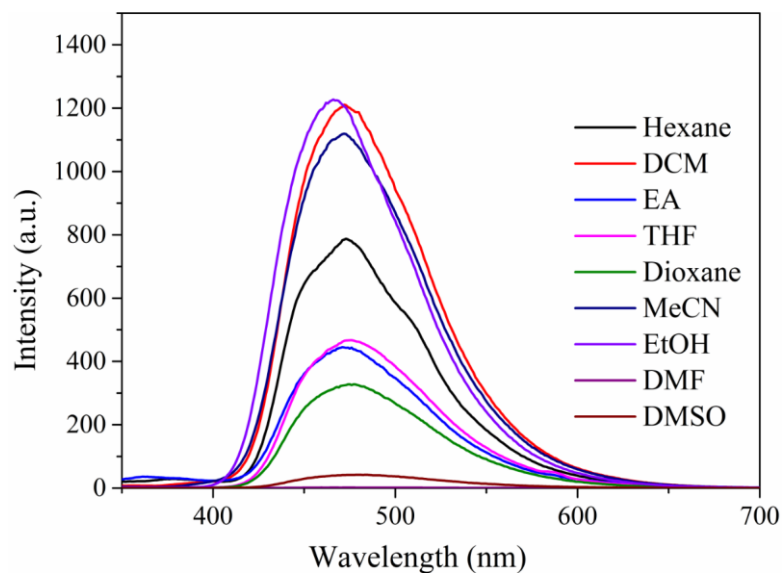

**Figure S5** Emission spectra of compound **3n** in different solvents ( $c = 10 \mu\text{M}$ ,  $\lambda_{\text{ex}} = 256 \text{ nm}$ ).

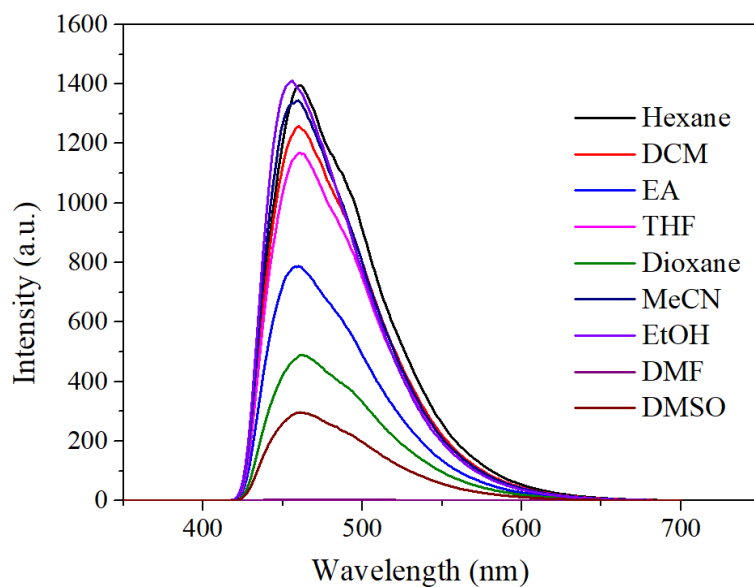

**Figure S6** Emission spectra of compound **4c** in different solvents ( $c = 10 \mu\text{M}$ ,  $\lambda_{\text{ex}} = 261 \text{ nm}$ ).

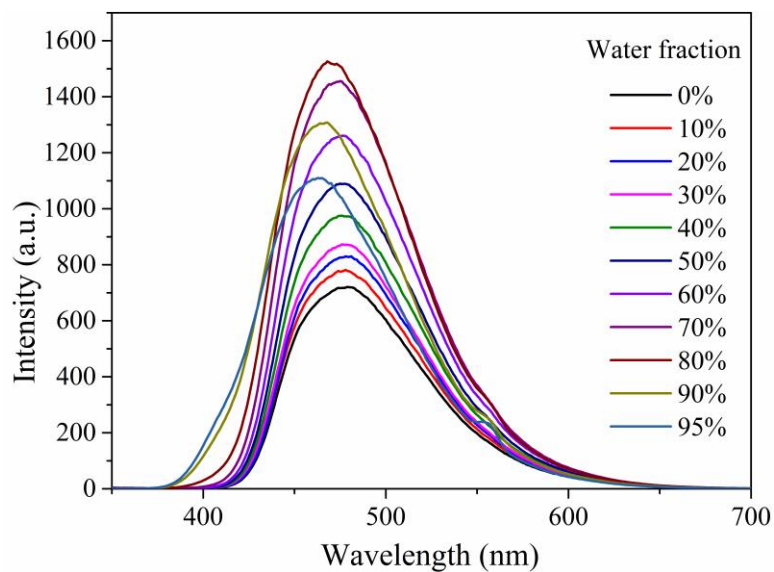

**Figure S7** Emission spectra of compound **3e** upon increasing the fraction of water in THF ( $c = 10 \mu\text{M}$ ,  $\lambda_{\text{ex}} = 278 \text{ nm}$ ).

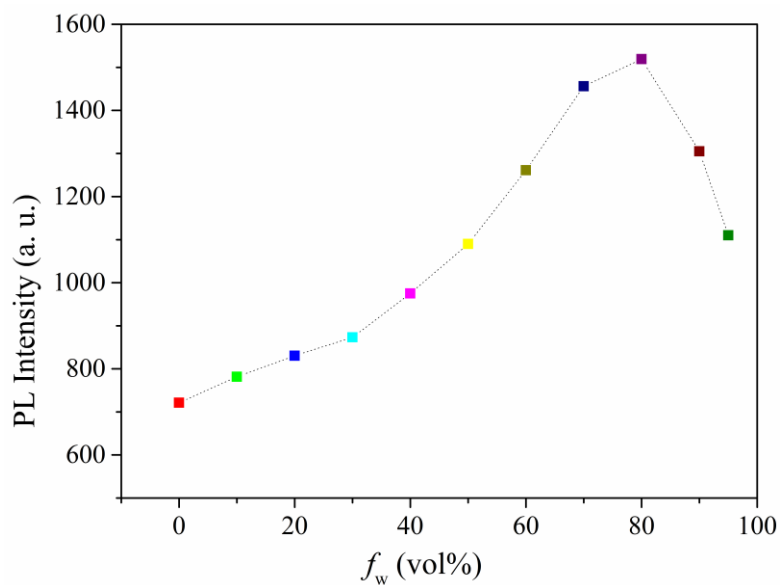

**Figure S8** Emission profile of compound **3e** upon increasing the fraction of water in THF ( $c = 10 \mu\text{M}$ ,  $\lambda_{\text{ex}} = 278 \text{ nm}$ ).



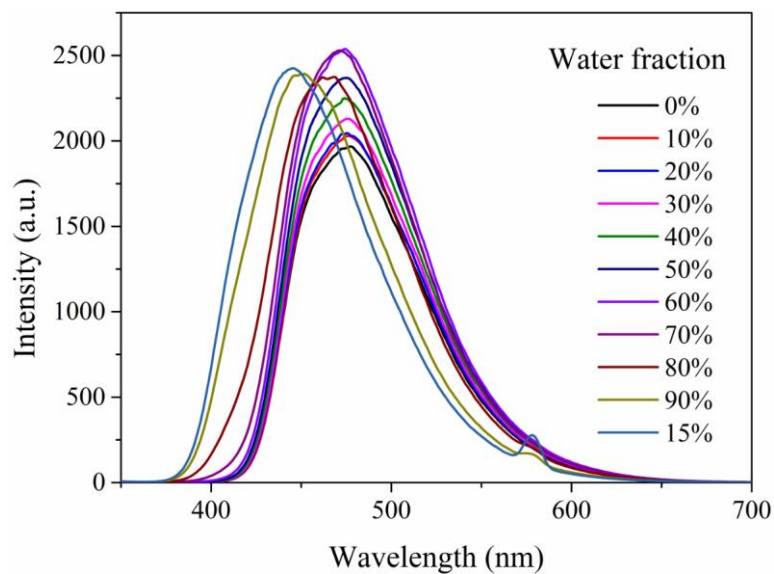

**Figure S9** Emission spectra of compound **3f** upon increasing the fraction of water in THF ( $c = 10 \mu\text{M}$ ,  $\lambda_{\text{ex}} = 289 \text{ nm}$ ).

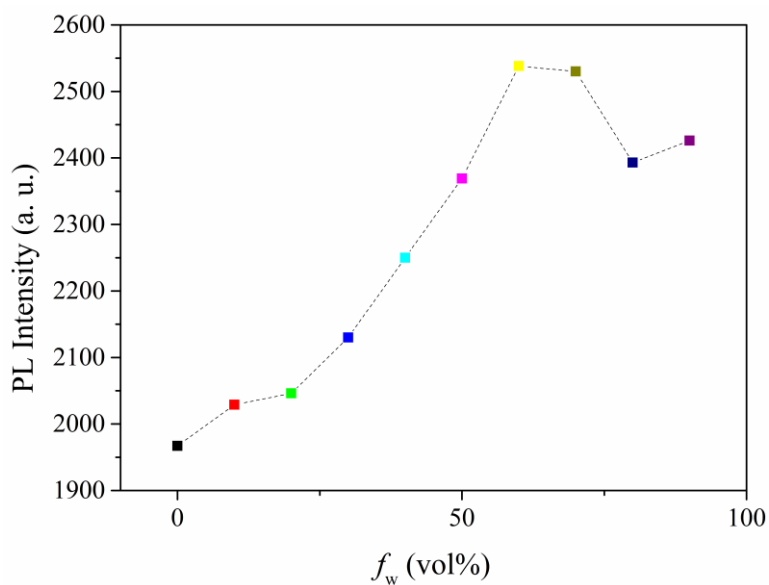

**Figure S10** Emission profile of compound **3f** upon increasing the fraction of water in THF ( $c = 10 \mu\text{M}$ ,  $\lambda_{\text{ex}} = 289 \text{ nm}$ ).

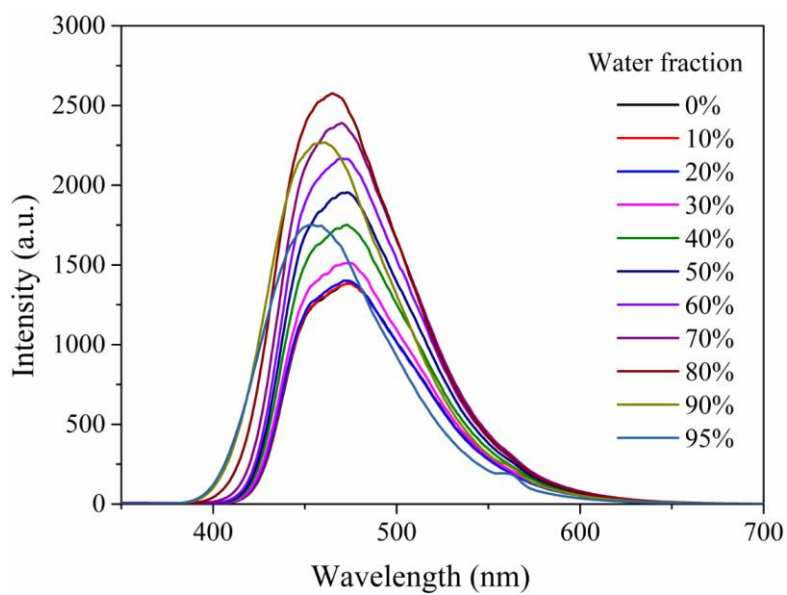

**Figure S11** Emission spectra of compound **3g** upon increasing the fraction of water in THF ( $c = 10 \mu\text{M}$ ,  $\lambda_{\text{ex}} = 281 \text{ nm}$ ).

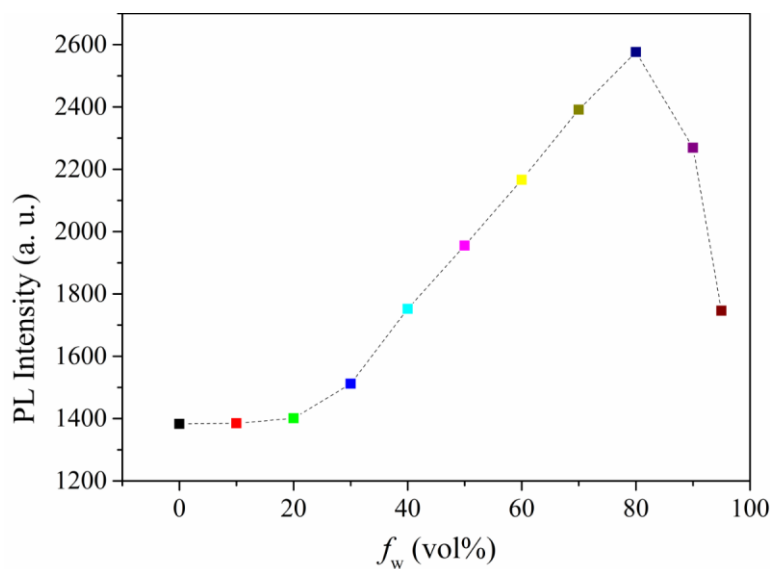

**Figure S12** Emission profile of compound **3g** upon increasing the fraction of water in THF ( $c = 10 \mu\text{M}$ ,  $\lambda_{\text{ex}} = 281 \text{ nm}$ ).

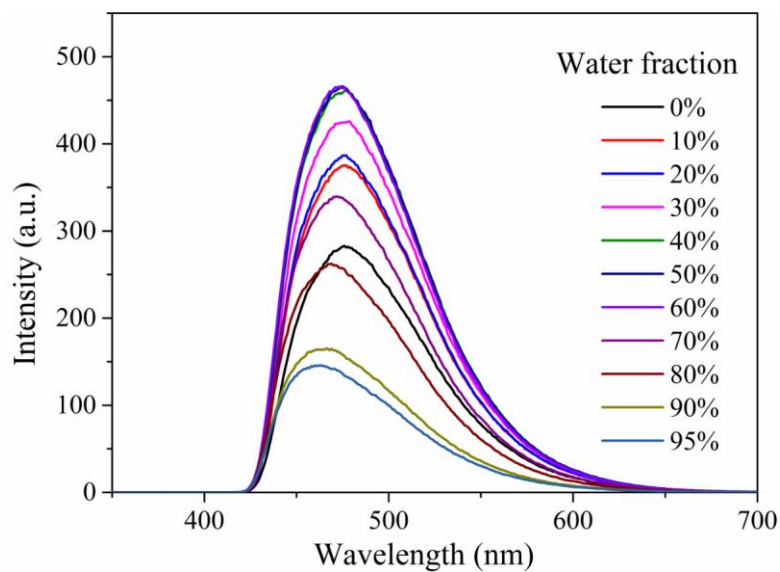

**Figure S13** Emission spectra of compound **3n** upon increasing the fraction of water in THF ( $c = 10 \mu\text{M}$ ,  $\lambda_{\text{ex}} = 256 \text{ nm}$ ).

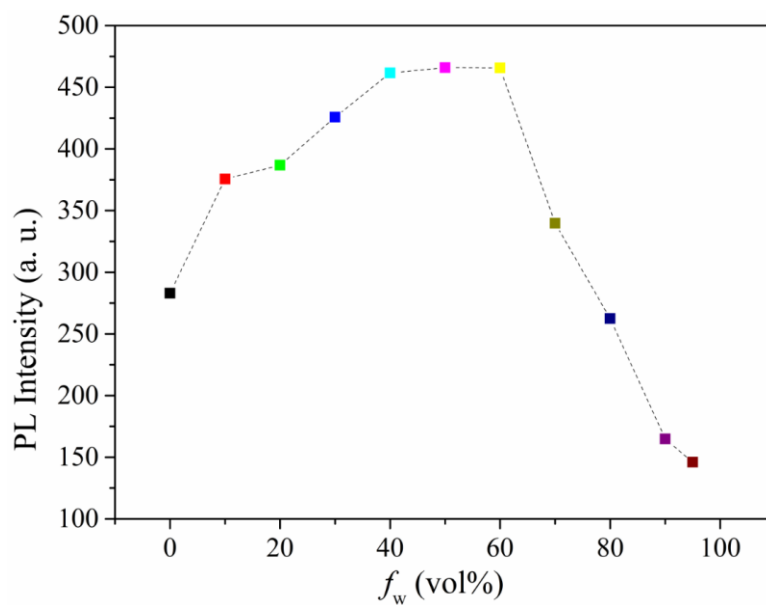

**Figure S14** Emission profile of compound **3n** upon increasing the fraction of water in THF ( $c = 10 \mu\text{M}$ ,  $\lambda_{\text{ex}} = 256 \text{ nm}$ ).

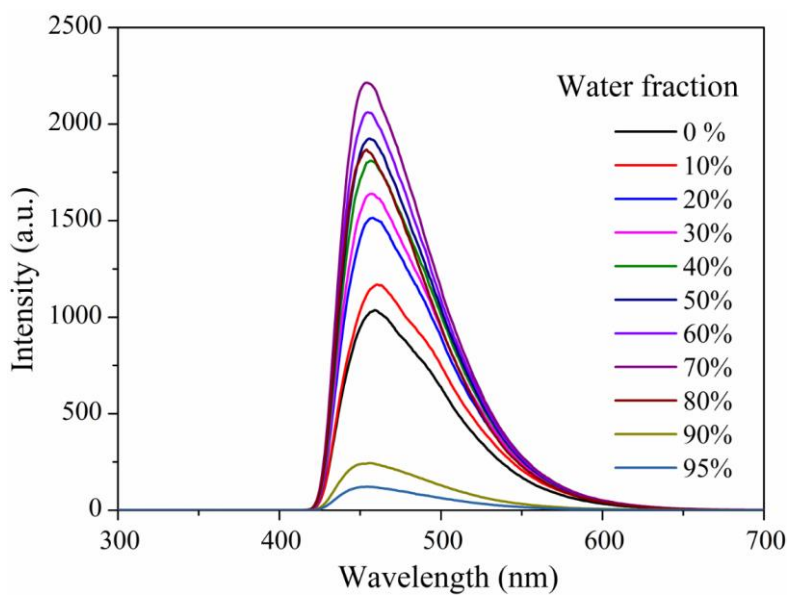

**Figure S15** Emission spectra of compound **4c** upon increasing the fraction of water in THF ( $c = 10 \mu\text{M}$ ,  $\lambda_{\text{ex}} = 261 \text{ nm}$ ).

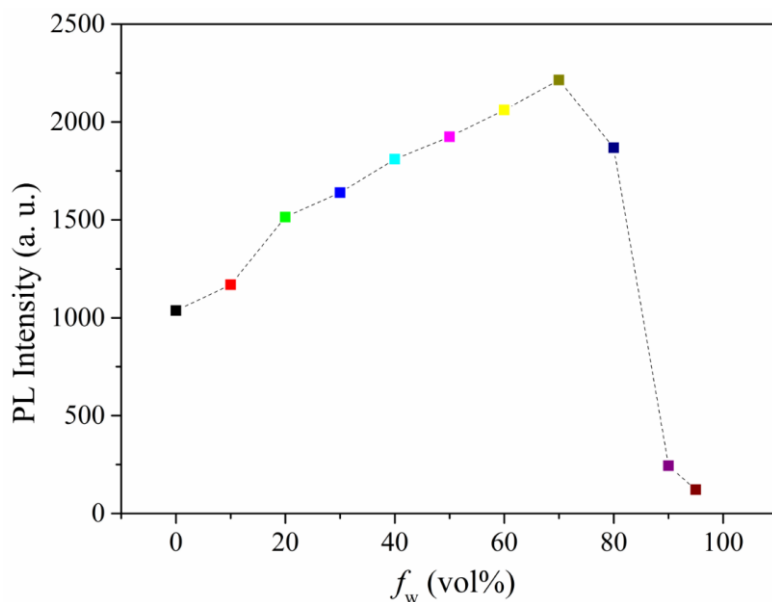

**Figure S16** Emission profile of compound **4c** upon increasing the fraction of water in THF ( $c = 10 \mu\text{M}$ ,  $\lambda_{\text{ex}} = 261 \text{ nm}$ ).

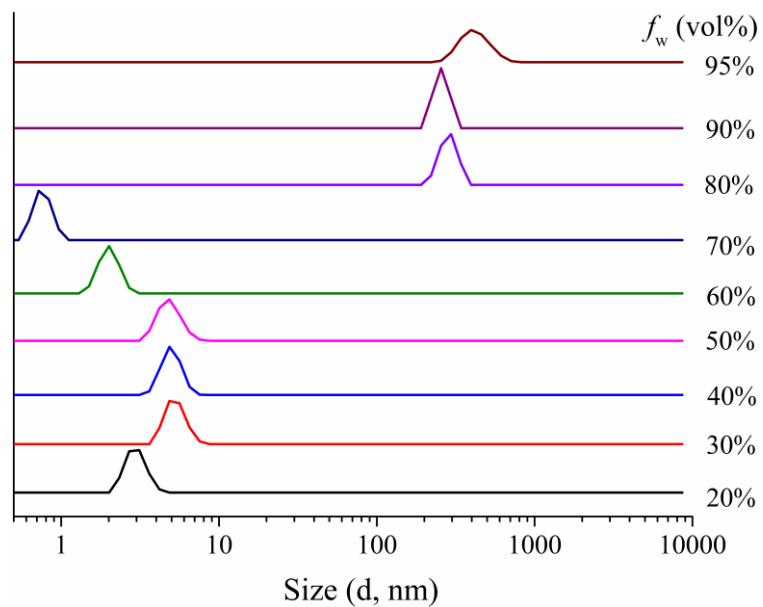

**Figure S17** DLS curves of **3e** upon increasing the fraction of water in THF ( $c = 10 \mu\text{M}$ )

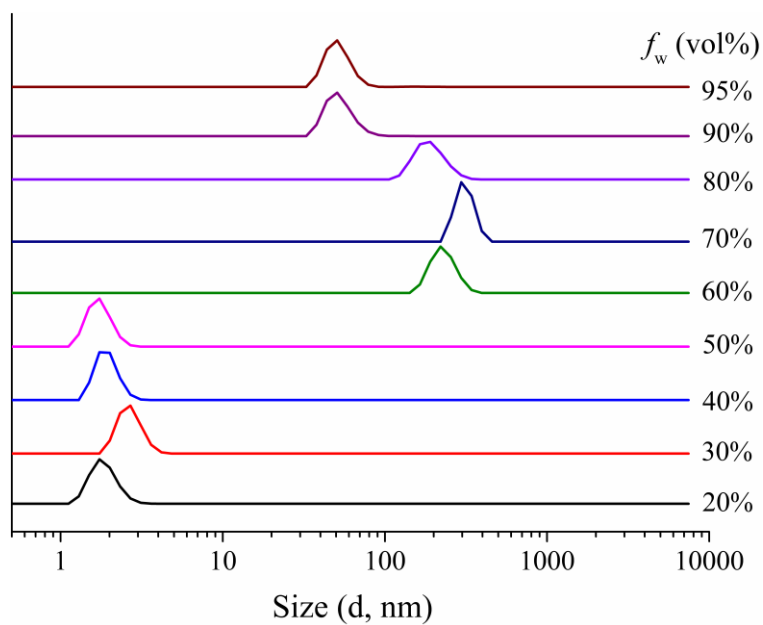

**Figure S18** DLS curves of **3f** upon increasing the fraction of water in THF ( $c = 10 \mu\text{M}$ ).

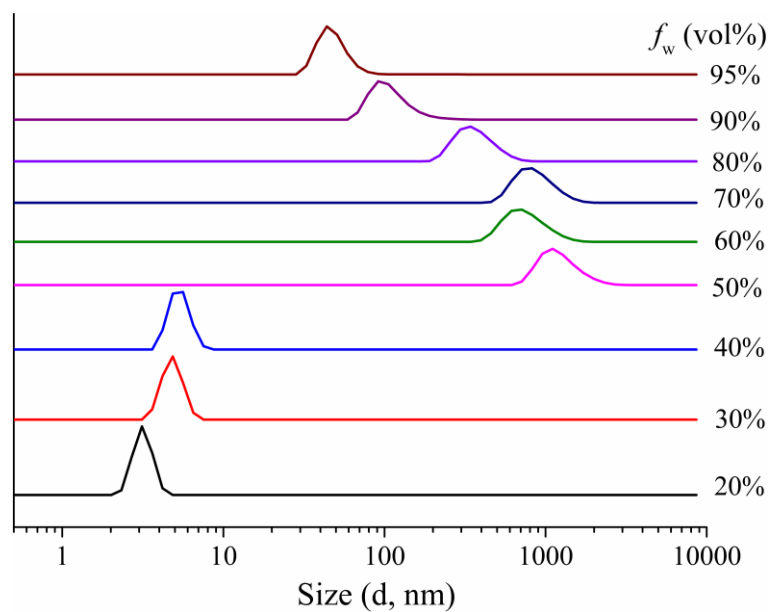

**Figure S19** DLS curves of **3g** upon increasing the fraction of water in THF ( $c = 10 \mu\text{M}$ ).

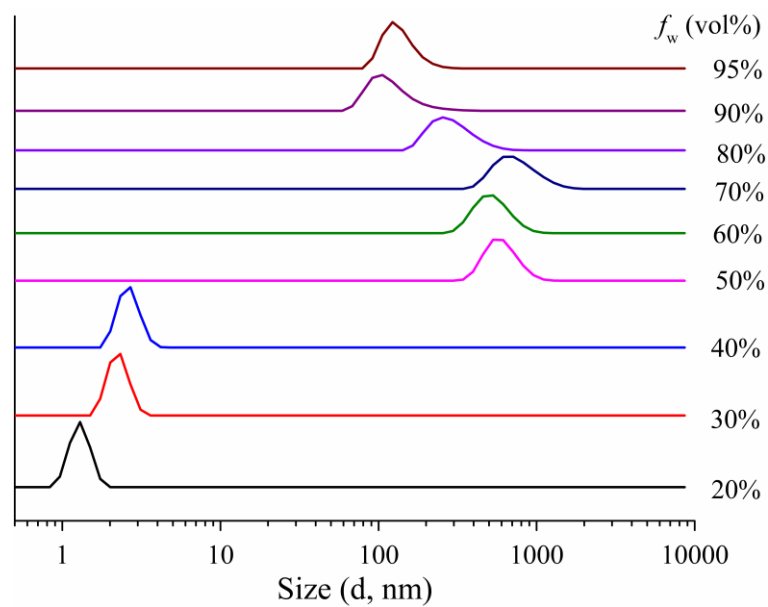

**Figure S20** DLS curves of **3n** upon increasing the fraction of water in THF ( $c = 10 \mu\text{M}$ ).

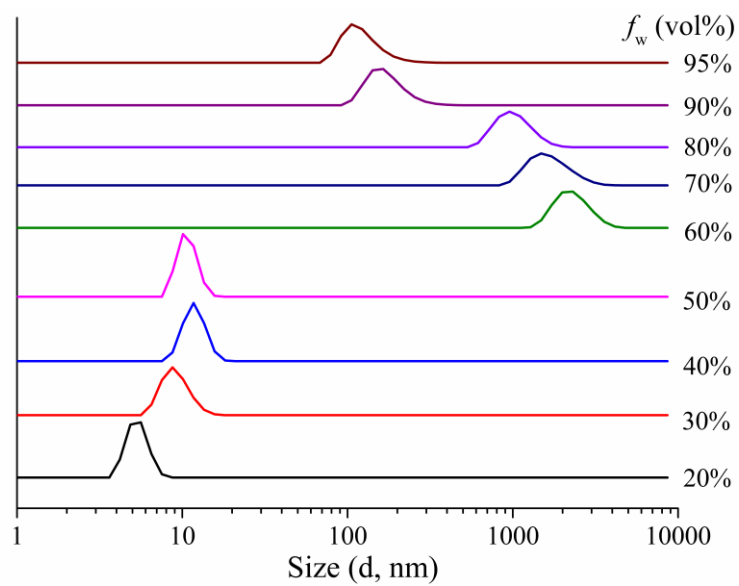

**Figure S21** DLS curves of **4c** upon increasing the fraction of water in THF ( $c = 10 \mu\text{M}$ ).

## Fluorescence Responses of **3b** to NAEs

Achieving the detection of nitroaromatic explosives (NAEs), e.g. picric acid (PA), is important for environmental protection and public security<sup>[3]</sup>. Compared with other NAEs, PA is of relatively high burst energy, toxicity and solubility in water. Therefore, the development of reliable sensing materials for rapid and sensitive detection of PA in aqueous solution has received special attention<sup>[4]</sup>. The charge-transfer emission quenching effect between PA, namely an electron-deficient compound, and electron-rich AIEgens is an approach for detecting PA<sup>[5, 6]</sup>. Thus, based on the research foundation of small-molecular fluorescent probes in our laboratory<sup>[6-10]</sup>, we investigated the fluorescence detection application for NAEs, especially PA.

**Caution!** Aromatic explosives, e.g., picric acid (PA) and 2,4-dinitrophenol (DNP), used in the present study are highly explosive and should be used only in small quantities.

Compound **3b** has the best fluorescence intensity at 95%  $f_w$  of THF solvent, and it is conducive to the detection of water-soluble PA. In view of this fact, we used **3b** as an example to study the photoluminescence (PL) spectra of **3b** upon adding PA solution in THF/H<sub>2</sub>O solvent ( $f_w = 95\%$ ). With the addition of PA solution (0-10 equiv.) into **3b** solution, the fluorescence intensity of compound **3b** at 440 nm is significantly decreased. Especially, when the PA concentration is 100  $\mu\text{M}$ , the fluorescence quenching efficiency can reach to 95.7% (see **Figure 3** in the main text).

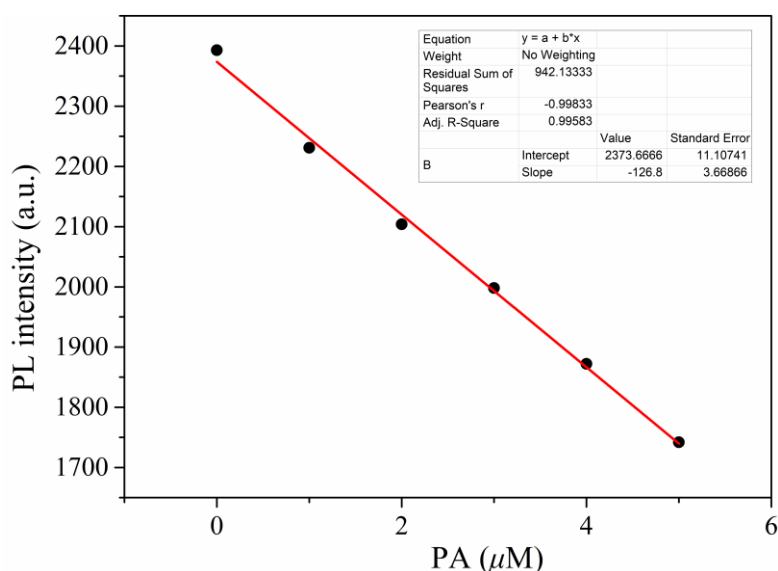

**Figure S22** The fluorescence intensity of **3b** at 440 nm as a function of picric acid concentration.



Limit of detection (LOD) is usually used as the standard for judging probe sensitivity. First, the standard deviation ( $\delta$ ) of the blank measurements ( $n = 10$ ) is calculated, and  $\delta = 1.795$ . Then, a calibration curve is plotted between the luminescence intensity of **3b** and the concentration of PA, the slope of the calibration curve  $K = -126.8$  (**Figure S22**).

According to the literature<sup>[8]</sup>, LOD is determined by using the equation:

$$\text{LOD} = 3\delta/K$$

The corresponding LOD can be calculated to be  $4.25 \times 10^{-8}$  M (9.73 ppb). This value of LOD possesses certain advantages among the reported PA probes<sup>[6, 11-13]</sup>.

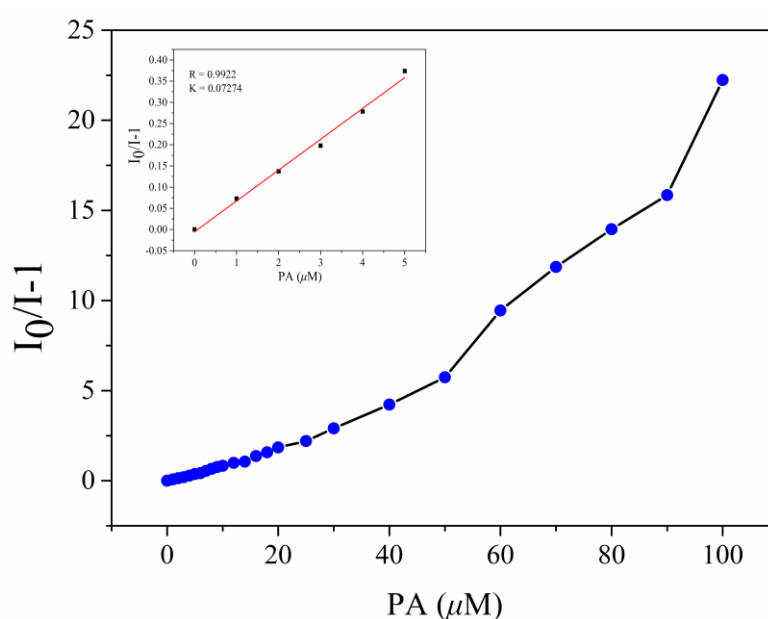

**Figure S23** Stern-Volmer plot in response to PA.

To further evaluate the quenching efficiency, the fluorometric titration data of **3b** are transformed to the Stern-Volmer plot as shown in **Figure S23**. According to the literature<sup>[14]</sup>, in this fluorescence quenching experiments, Stern-Volmer quenching constant ( $K_{sv}$ ) can be calculated according to the Stern-Volmer equation:

$$I_0 / I-1 = K_{sv} [Q]$$

Where  $I_0$  and  $I$  are the fluorescence intensities observed in the absence and presence of PA, respectively;  $[Q]$  is the quencher concentration.

Thus, the quenching constant  $K_{sv}$  is calculated to be  $7.27 \times 10^4 \text{ M}^{-1}$ , and this value is higher than those of some reported PA probes.<sup>[12, 13, 15-17]</sup>

We further explored the fluorometric detection experiments of other NAEs to study the

selectivity of **3b** for sensing PA (see **Table S1**). When 10 equivalents of other NAEs (or analogues) are added dropwise to the THF/H<sub>2</sub>O ( $f_w = 95\%$ ) solution of **3b**, the fluorescence intensity is quenched to different degrees. Among them, **3b** has a moderate response to 2,4-dinitrophenol (2,4-DNP), 4-nitrobenzoic acid (4-NBAc), 4-nitrobenzaldehyde (4-NBA) and 1-methyl-2,4-dinitrobenzene (4-DNT), respectively. The quenching efficiency is between 41.0% and 75.0%. However, **3b** has no obvious response to phenol, nitrobenzene (NB), 4-nitrophenol (4-NP), 4-nitrotoluene (4-NT) and nitromethane (NM), respectively. The quenching efficiency is 20.4-29.2%.

**Table S1** Sensing performance of **3b** towards NAEs (or analogues).

| NAEs                                          | Structure | Quenching efficiency <sup>a</sup> | NAEs                            | Structure                       | Quenching efficiency <sup>a</sup> |
|-----------------------------------------------|-----------|-----------------------------------|---------------------------------|---------------------------------|-----------------------------------|
| <b>PA</b><br>(picric acid)                    |           | 95.7%                             | <b>PhOH</b><br>(phenol)         |                                 | 29.2%                             |
| <b>2,4-DNP</b><br>(2,4-dinitrophenol)         |           | 75.0%                             | <b>NB</b><br>(nitrobenzene)     |                                 | 26.0%                             |
| <b>4-NBAc</b><br>(4-nitrobenzoic acid)        |           | 68.7%                             | <b>4-NP</b><br>(4-nitrophenol)  |                                 | 22.4%                             |
| <b>4-NBA</b><br>(4-nitrobenzaldehyde)         |           | 61.6%                             | <b>4-NT</b><br>(4-nitrotoluene) |                                 | 21.5%                             |
| <b>4-DNT</b><br>(1-methyl-2,4-dinitrobenzene) |           | 41.0%                             | <b>NM</b><br>(Nitromethane)     | CH <sub>3</sub> NO <sub>2</sub> | 20.4%                             |

<sup>a</sup> The quenching efficiency were calculated after adding 10 equiv. NACs into **3b** solution.

In a word, **3b** can be used as a fluorescent probe to detect PA by “turn-off” response in aqueous system and has the advantages of low detection limit and large quenching constant. At the same time, **3b** also has a moderate response to some other NAEs.

## Data of Single-crystal X-ray Analysis

**Table S2** Crystal data and structure refinement for **3b**.

| Compound                                   | <b>3b</b>                                                                                                       |
|--------------------------------------------|-----------------------------------------------------------------------------------------------------------------|
| Empirical formula                          | C <sub>18</sub> H <sub>14</sub> N <sub>2</sub>                                                                  |
| Formula weight                             | 258.31                                                                                                          |
| Temperature (K)                            | 297                                                                                                             |
| Wavelength (Å)                             | 0.71073                                                                                                         |
| Crystal system                             | Monoclinic                                                                                                      |
| Space group                                | P 1 21/n 1                                                                                                      |
| Unit cell dimensions (Å, °)                | $a = 10.6034(8)$ , $b = 12.7690(11)$ , $c = 10.6190(9)$<br>$\alpha = 90$ , $\beta = 110.867(9)$ , $\gamma = 90$ |
| Volume (Å <sup>3</sup> )                   | 1343.5(2)                                                                                                       |
| Z                                          | 4                                                                                                               |
| Density (calculated) (Mg/m <sup>3</sup> )  | 1.277                                                                                                           |
| Absorption coefficient (mm <sup>-1</sup> ) | 0.076                                                                                                           |
| F(000)                                     | 544.0                                                                                                           |
| Theta range for data collection            | 6.768 to 49.996                                                                                                 |
| Index ranges                               | -9<=h<=12, -12<=k<=15, -12<=l<=12                                                                               |
| Reflections collected                      | 6242                                                                                                            |
| Independent reflections                    | 2366 [R(int) = 0.0496, R(sigma) = 0.0672]                                                                       |
| Completeness to theta = 24.998°            | 99.6%                                                                                                           |
| Absorption correction                      | Semi-empirical from equivalents                                                                                 |
| Max. and min. transmission                 | 1.00000 and 0.721                                                                                               |
| Refinement method                          | Full-matrix least-squares on F <sup>2</sup>                                                                     |
| Data / restraints / parameters             | 2366 / 0 / 182                                                                                                  |
| Goodness-of-fit on F <sup>2</sup>          | 1.061                                                                                                           |
| Final R indices [I>2sigma(I)]              | R <sub>1</sub> = 0.0611, wR <sub>2</sub> = 0.1172                                                               |
| R indices (all data)                       | R <sub>1</sub> = 0.1017, wR <sub>2</sub> = 0.1372                                                               |
| Largest diff. peak and hole                | 0.14 and -0.22 e.Å <sup>-3</sup>                                                                                |

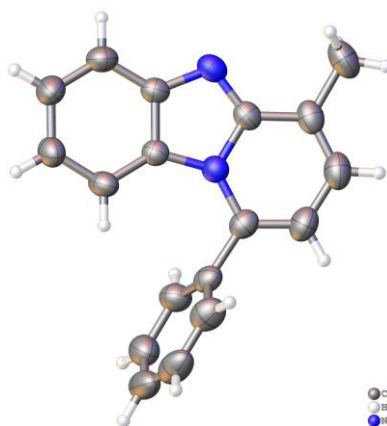

**Fig. S24** The molecular structure of **3b**.

**Table S3** Crystal data and structure refinement for **3f**.

| Compound                                   | <b>3f</b>                                                                                                                         |
|--------------------------------------------|-----------------------------------------------------------------------------------------------------------------------------------|
| Empirical formula                          | C <sub>24</sub> H <sub>18</sub> N <sub>2</sub>                                                                                    |
| Formula weight                             | 334.40                                                                                                                            |
| Temperature (K)                            | 297                                                                                                                               |
| Wavelength (Å)                             | 0.71073                                                                                                                           |
| Crystal system                             | Monoclinic                                                                                                                        |
| Space group                                | P 1 21/n 1                                                                                                                        |
| Unit cell dimensions (Å, °)                | $a = 9.9393(11)$ , $b = 10.0786(16)$ , $c = 10.2828(11)$<br>$\alpha = 106.688(12)$ , $\beta = 91.551(9)$ , $\gamma = 116.591(13)$ |
| Volume (Å <sup>3</sup> )                   | 867.6(2)                                                                                                                          |
| Z                                          | 2                                                                                                                                 |
| Density (calculated) (Mg/m <sup>3</sup> )  | 1.280                                                                                                                             |
| Absorption coefficient (mm <sup>-1</sup> ) | 0.075                                                                                                                             |
| F(000)                                     | 352.0                                                                                                                             |
| Theta range for data collection            | 7.364 to 58.794                                                                                                                   |
| Index ranges                               | -13<=h<=9, -11<=k<=13, -14<=l<=13                                                                                                 |
| Reflections collected                      | 6873                                                                                                                              |
| Independent reflections                    | 3953 [R(int) = 0.0229, R(sigma) = 0.511]                                                                                          |
| Completeness to theta = 29.397°            | 82.5 %                                                                                                                            |
| Absorption correction                      | Semi-empirical from equivalents                                                                                                   |
| Max. and min. transmission                 | 1.00000 and 0.778                                                                                                                 |
| Refinement method                          | Full-matrix least-squares on F <sup>2</sup>                                                                                       |
| Data / restraints / parameters             | 3953 / 0 / 237                                                                                                                    |
| Goodness-of-fit on F <sup>2</sup>          | 1.050                                                                                                                             |
| Final R indices [I>2sigma(I)]              | R <sub>1</sub> = 0.0544, wR <sub>2</sub> = 0.1159                                                                                 |
| R indices (all data)                       | R <sub>1</sub> = 0.1015, wR <sub>2</sub> = 0.1464                                                                                 |
| Largest diff. peak and hole                | 0.16 and -0.15 e.Å <sup>-3</sup>                                                                                                  |

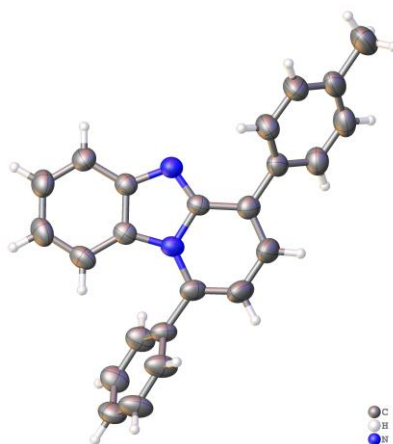**Fig. S25** The molecular structure of **3f**.

**Table S4** Crystal data and structure refinement for **3i**.

| Compound                                   | <b>3i</b>                                                                                                                         |
|--------------------------------------------|-----------------------------------------------------------------------------------------------------------------------------------|
| Empirical formula                          | C <sub>23</sub> H <sub>15</sub> Cl N <sub>2</sub>                                                                                 |
| Formula weight                             | 354.82                                                                                                                            |
| Temperature (K)                            | 297                                                                                                                               |
| Wavelength (Å)                             | 0.71073                                                                                                                           |
| Crystal system                             | Monoclinic                                                                                                                        |
| Space group                                | P 1 21/n 1                                                                                                                        |
| Unit cell dimensions (Å, °)                | $a = 9.8768(10)$ , $b = 9.9849(14)$ , $c = 10.2735(14)$<br>$\alpha = 106.386(12)$ , $\beta = 91.697(10)$ , $\gamma = 116.134(12)$ |
| Volume (Å <sup>3</sup> )                   | 858.6(2)                                                                                                                          |
| Z                                          | 2                                                                                                                                 |
| Density (calculated) (Mg/m <sup>3</sup> )  | 1.372                                                                                                                             |
| Absorption coefficient (mm <sup>-1</sup> ) | 0.231                                                                                                                             |
| F(000)                                     | 368.0                                                                                                                             |
| Theta range for data collection            | 7.358 to 58.816 deg                                                                                                               |
| Index ranges                               | -13<=h<=13, -12<=k<=10, -12<=l<=14                                                                                                |
| Reflections collected                      | 7162                                                                                                                              |
| Independent reflections                    | 3948 [R(int) = 0.0245, R(sigma) = 0.0495]                                                                                         |
| Completeness to theta = 29.408°            | 83.3 %                                                                                                                            |
| Absorption correction                      | Semi-empirical from equivalents                                                                                                   |
| Max. and min. transmission                 | 1.000 and 0.937                                                                                                                   |
| Refinement method                          | Full-matrix least-squares on F <sup>2</sup>                                                                                       |
| Data / restraints / parameters             | 3948 / 0 / 236                                                                                                                    |
| Goodness-of-fit on F <sup>2</sup>          | 1.021                                                                                                                             |
| Final R indices [I>2sigma(I)]              | R <sub>1</sub> = 0.0528, wR <sub>2</sub> = 0.1064                                                                                 |
| R indices (all data)                       | R <sub>1</sub> = 0.0975, wR <sub>2</sub> = 0.1298                                                                                 |
| Largest diff. peak and hole                | 0.22 and -0.30 e.Å <sup>-3</sup>                                                                                                  |

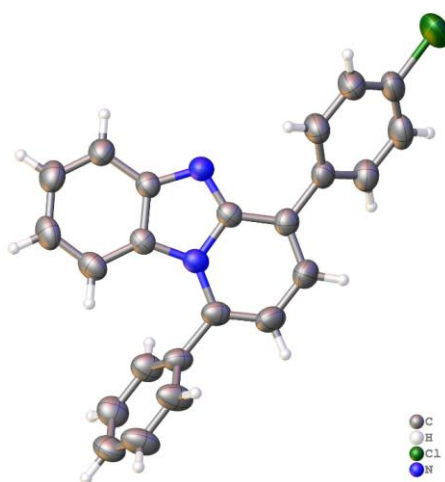**Fig. S26** The molecular structure of **3i**.

**Table S5** Crystal data and structure refinement for **3j**.

| Compound                                   | <b>3j</b>                                                                                                                        |
|--------------------------------------------|----------------------------------------------------------------------------------------------------------------------------------|
| Empirical formula                          | C <sub>23</sub> H <sub>15</sub> N <sub>3</sub> O <sub>2</sub>                                                                    |
| Formula weight                             | 365.38                                                                                                                           |
| Temperature (K)                            | 297                                                                                                                              |
| Wavelength (Å)                             | 0.71073                                                                                                                          |
| Crystal system                             | Monoclinic                                                                                                                       |
| Space group                                | P 1 21/n 1                                                                                                                       |
| Unit cell dimensions (Å, °)                | $a = 9.9767(11)$ , $b = 10.2000(11)$ , $c = 10.3359(12)$<br>$\alpha = 107.613(5)$ , $\beta = 91.055(9)$ , $\gamma = 117.427(11)$ |
| Volume (Å <sup>3</sup> )                   | 874.20(19)                                                                                                                       |
| Z                                          | 2                                                                                                                                |
| Density (calculated) (Mg/m <sup>3</sup> )  | 1.388                                                                                                                            |
| Absorption coefficient (mm <sup>-1</sup> ) | 0.091                                                                                                                            |
| F(000)                                     | 380.0                                                                                                                            |
| Theta range for data collection            | 6.856 to 49.998 deg                                                                                                              |
| Index ranges                               | -11 ≤ h ≤ 10, -8 ≤ k ≤ 12, -12 ≤ l ≤ 11                                                                                          |
| Reflections collected                      | 6378                                                                                                                             |
| Independent reflections                    | 3076 [R(int) = 0.0376, R(sigma) = 0.0719]                                                                                        |
| Completeness to theta = 24.999°            | 99.7 %                                                                                                                           |
| Absorption correction                      | Semi-empirical from equivalents                                                                                                  |
| Max. and min. transmission                 | 1.000 and 0.937                                                                                                                  |
| Refinement method                          | Full-matrix least-squares on F <sup>2</sup>                                                                                      |
| Data / restraints / parameters             | 3076 / 0 / 253                                                                                                                   |
| Goodness-of-fit on F <sup>2</sup>          | 1.017                                                                                                                            |
| Final R indices [I > 2σ(I)]                | R <sub>1</sub> = 0.0626, wR <sub>2</sub> = 0.1243                                                                                |
| R indices (all data)                       | R <sub>1</sub> = 0.1216, wR <sub>2</sub> = 0.1541                                                                                |
| Largest diff. peak and hole                | 0.19 and -0.18 e.Å <sup>-3</sup>                                                                                                 |

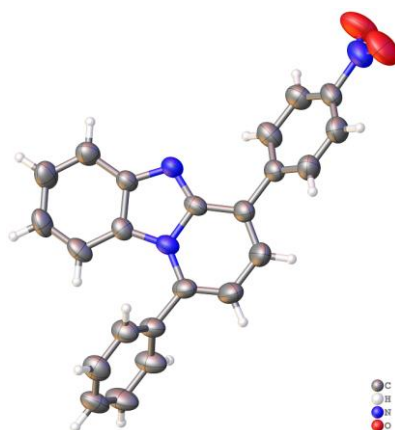**Fig. S27** The molecular structure of **3j**.

**Table S6** Crystal data and structure refinement for **4i**.

| Compound                                   | <b>4i</b>                                                                                                       |
|--------------------------------------------|-----------------------------------------------------------------------------------------------------------------|
| Empirical formula                          | C <sub>25</sub> H <sub>19</sub> ClN <sub>2</sub>                                                                |
| Formula weight                             | 382.87                                                                                                          |
| Temperature (K)                            | 293                                                                                                             |
| Wavelength (Å)                             | 0.71073                                                                                                         |
| Crystal system                             | Monoclinic                                                                                                      |
| Space group                                | P 1 21/n 1                                                                                                      |
| Unit cell dimensions (Å, °)                | $a = 10.0520(9)$ , $b = 10.4783(11)$ , $c = 18.7614(15)$<br>$\alpha = 90$ , $\beta = 93.129(8)$ , $\gamma = 90$ |
| Volume (Å <sup>3</sup> )                   | 1973.2(3)                                                                                                       |
| Z                                          | 4                                                                                                               |
| Density (calculated) (Mg/m <sup>3</sup> )  | 1.289                                                                                                           |
| Absorption coefficient (mm <sup>-1</sup> ) | 0.206                                                                                                           |
| F(000)                                     | 800.0                                                                                                           |
| Theta range for data collection            | 6.972 to 49.996                                                                                                 |
| Index ranges                               | -11 ≤ h ≤ 11, -8 ≤ k ≤ 12, -22 ≤ l ≤ 22                                                                         |
| Reflections collected                      | 8419                                                                                                            |
| Independent reflections                    | 3462 [R(int) = 0.0309, R(sigma) = 0.0578]                                                                       |
| Completeness to theta = 24.998°            | 99.8 %                                                                                                          |
| Absorption correction                      | Semi-empirical from equivalents                                                                                 |
| Max. and min. transmission                 | 1.000 and 0.110                                                                                                 |
| Refinement method                          | Full-matrix least-squares on F <sup>2</sup>                                                                     |
| Data / restraints / parameters             | 3462 / 0 / 255                                                                                                  |
| Goodness-of-fit on F <sup>2</sup>          | 1.035                                                                                                           |
| Final R indices [I > 2σ(I)]                | R <sub>1</sub> = 0.0560, wR <sub>2</sub> = 0.1132                                                               |
| R indices (all data)                       | R <sub>1</sub> = 0.0934, wR <sub>2</sub> = 0.1327                                                               |
| Largest diff. peak and hole                | 0.20 and -0.31 e.Å <sup>-3</sup>                                                                                |

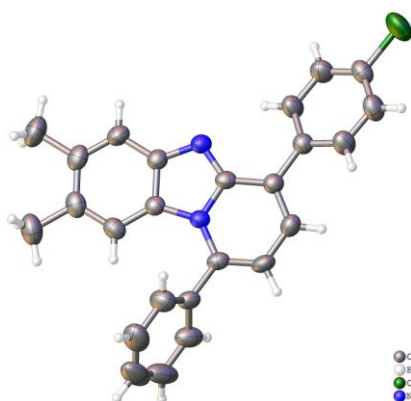**Fig. S28** The molecular structure of **4i**.

## Characterization Data for All Products 3a-3n, 4a-4k, 3aa and 3ab

1-Phenylbenzo[4,5]imidazo[1,2-*a*]pyridine (**3a**), yellowish waxy (61 mg, 83%); <sup>1</sup>H NMR (600 MHz, CDCl<sub>3</sub>), δ, ppm: 6.59 (*d*, *J* = 8.4 Hz, 1H), 6.67 (*d*, *J* = 6.6 Hz, 1H), 6.96-7.00 (*m*, 1H), 7.42 (*t*, *J* = 7.2 Hz, 1H), 7.45-7.49 (*m*, 1H), 7.55 (*d*, *J* = 7.2 Hz, 2H), 7.59-7.62 (*m*, 2H), 7.64-7.67 (*m*, 1H), 7.73 (*d*, *J* = 9.6 Hz, 1H), 7.93 (*d*, *J* = 8.4 Hz, 1H); <sup>13</sup>C NMR (150 MHz, CDCl<sub>3</sub>), δ, ppm: 112.1, 114.7, 116.9, 119.7, 120.4, 125.2, 129.0, 129.1, 129.2, 129.3, 130.1, 134.5, 141.3, 145.0, 149.6; ESI-HRMS, *m/z*: Calcd for C<sub>17</sub>H<sub>13</sub>N<sub>2</sub> [M+H]<sup>+</sup>, 245.1073, found: 245.1096.

4-Methyl-1-phenylbenzo[4,5]imidazo[1,2-*a*]pyridine (**3b**), yellow solid (59 mg, 76%); m.p. 151-153 °C; <sup>1</sup>H NMR (600 MHz, CDCl<sub>3</sub>), δ, ppm: 2.78 (*s*, 3H), 6.59-6.63 (*m*, 2H), 6.96-6.99 (*m*, 1H), 7.30 (*d*, *J* = 7.2 Hz, 1H), 7.42 (*t*, *J* = 7.2 Hz, 1H), 7.55 (*d*, *J* = 8.4 Hz, 2H), 7.59-7.66 (*m*, 3H), 7.98 (*d*, *J* = 9.0 Hz, 1H); <sup>13</sup>C NMR (150 MHz, CDCl<sub>3</sub>), δ, ppm: 17.7, 112.1, 114.7, 119.8, 120.3, 124.9, 126.4, 127.6, 129.0, 129.2, 129.7, 129.8, 134.7, 139.0, 144.7, 150.0; ESI-HRMS, *m/z*: Calcd for C<sub>18</sub>H<sub>15</sub>N<sub>2</sub> [M+H]<sup>+</sup>, 259.1230, found: 259.1240.

4-Ethyl-1-phenylbenzo[4,5]imidazo[1,2-*a*]pyridine (**3c**), yellow solid (60 mg, 74%); m.p. 99-101 °C; <sup>1</sup>H NMR (600 MHz, CDCl<sub>3</sub>), δ, ppm: 1.51 (*t*, *J* = 7.2 Hz, 3H), 3.23 (*q*, *J* = 7.2 Hz, 2H), 6.60 (*d*, *J* = 8.4 Hz, 1H), 6.65 (*d*, *J* = 7.2 Hz, 1H), 6.95-6.99 (*m*, 1H), 7.31 (*d*, *J* = 7.2 Hz, 1H), 7.42 (*t*, *J* = 7.8 Hz, 1H), 7.56 (*d*, *J* = 7.8 Hz, 2H), 7.59-7.62 (*m*, 2H), 7.63-7.66 (*m*, 1H), 7.98 (*d*, *J* = 7.8 Hz, 1H); <sup>13</sup>C NMR (150 MHz, CDCl<sub>3</sub>), δ, ppm: 13.1, 24.3, 112.1, 114.7, 119.7, 120.2, 124.9, 125.5, 129.0, 129.2, 129.7, 129.8, 132.1, 134.8, 138.8, 144.7, 149.6; ESI-HRMS, *m/z*: Calcd for C<sub>19</sub>H<sub>17</sub>N<sub>2</sub> [M+H]<sup>+</sup>, 273.1386, found: 273.1388.

4-Butyl-1-phenylbenzo[4,5]imidazo[1,2-*a*]pyridine (**3d**), yellowish waxy (69 mg, 77%); <sup>1</sup>H NMR (600 MHz, CDCl<sub>3</sub>), δ, ppm: 1.03 (*t*, *J* = 7.2 Hz, 3H), 1.53-1.58 (*m*, 2H), 1.89-1.95 (*m*, 2H), 3.20 (*t*, *J* = 7.2 Hz, 2H), 6.60 (*d*, *J* = 8.4 Hz, 1H), 6.64 (*d*, *J* = 7.2 Hz, 1H), 6.95-6.98 (*m*, 1H), 7.29 (*d*, *J* = 7.2 Hz, 1H), 7.41 (*t*, *J* = 7.2 Hz, 1H), 7.55 (*d*, *J* = 7.2 Hz, 2H), 7.59-7.62 (*m*, 2H), 7.63-7.66 (*m*, 1H), 7.98 (*d*, *J* = 8.4 Hz, 1H); <sup>13</sup>C NMR (150 MHz, CDCl<sub>3</sub>), δ, ppm: 14.1, 22.7, 30.7, 30.9, 112.1, 114.7, 119.7, 120.1, 124.9, 126.2, 129.0, 129.2, 129.7, 129.8, 130.8, 134.8, 138.8, 144.7, 149.7; ESI-HRMS, *m/z*: Calcd for C<sub>21</sub>H<sub>21</sub>N<sub>2</sub> [M+H]<sup>+</sup>, 301.1699, found: 301.1696.

1,4-Diphenylbenzo[4,5]imidazo[1,2-*a*]pyridine (**3e**), yellowish solid (87 mg, 90%); m.p. 146-148 °C; <sup>1</sup>H NMR (600 MHz, CDCl<sub>3</sub>), δ, ppm: 6.65 (*d*, *J* = 8.4 Hz, 1H), 6.79 (*d*, *J* = 7.2 Hz, 1H), 6.99-7.03 (*m*, 1H), 7.44 (*t*, *J* = 7.2 Hz, 1H), 7.47 (*t*, *J* = 7.2 Hz, 1H), 7.56-7.90 (*m*, 8H), 8.02 (*d*, *J* = 8.4 Hz, 1H), 8.11 (*d*, *J* = 7.8 Hz, 2H); <sup>13</sup>C NMR (150 MHz, CDCl<sub>3</sub>), δ, ppm: 112.4, 114.7, 120.2, 120.5, 125.0, 127.6, 128.4, 128.7, 129.1, 129.2, 129.5, 129.6, 130.0, 134.6, 136.9, 140.2, 145.1, 148.5; ESI-HRMS, *m/z*: Calcd for C<sub>23</sub>H<sub>17</sub>N<sub>2</sub> [M+H]<sup>+</sup>, 321.1386,



found: 321.1393.

1-Phenyl-4-(*p*-tolyl)benzo[4,5]imidazo[1,2-*a*]pyridine (**3f**), yellowish solid (87 mg, 87%); m.p. 209-211 °C; <sup>1</sup>H NMR (600 MHz, CDCl<sub>3</sub>), δ, ppm: 2.49 (*s*, 3H), 6.65 (*d*, *J* = 8.4 Hz, 1H), 6.77 (*d*, *J* = 7.2 Hz, 1H), 6.99-7.02 (*m*, 1H), 7.40 (*d*, *J* = 7.8 Hz, 2H), 7.42-7.45 (*m*, 1H), 7.55 (*d*, *J* = 7.2 Hz, 1H), 7.60-7.67 (*m*, 5H), 8.00-8.03 (*m*, 3H); <sup>13</sup>C NMR (150 MHz, CDCl<sub>3</sub>), δ, ppm: 21.4, 112.4, 114.7, 120.2, 120.4, 125.0, 127.2, 129.0, 129.1, 129.4, 129.5, 129.6, 130.0, 134.0, 134.7, 138.2, 139.9, 145.1, 148.7; ESI-HRMS, *m/z*: Calcd for C<sub>24</sub>H<sub>19</sub>N<sub>2</sub> [M+H]<sup>+</sup>, 335.1543, found: 335.1557.

4-(4-Methoxyphenyl)-1-phenylbenzo[4,5]imidazo[1,2-*a*]pyridine (**3g**), yellow solid (96 mg, 91%); m.p. 186-188 °C; <sup>1</sup>H NMR (600 MHz, CDCl<sub>3</sub>), δ, ppm: 3.92 (*s*, 3H), 6.64 (*d*, *J* = 8.4 Hz, 1H), 6.77 (*d*, *J* = 6.6 Hz, 1H), 6.97-7.01 (*m*, 1H), 7.12 (*d*, *J* = 8.4 Hz, 2H), 7.41-7.44 (*m*, 1H), 7.53 (*d*, *J* = 6.6 Hz, 1H), 7.60-7.67 (*m*, 5H), 8.00 (*d*, *J* = 7.8 Hz, 1H), 8.08 (*d*, *J* = 8.4 Hz, 2H); <sup>13</sup>C NMR (150 MHz, CDCl<sub>3</sub>), δ, ppm: 55.4, 112.4, 114.1, 114.7, 120.2, 120.4, 124.9, 126.7, 129.1, 129.1, 129.2, 129.3, 129.6, 129.9, 130.3, 134.7, 137.7, 145.1, 148.7, 159.8; ESI-HRMS, *m/z*: Calcd for C<sub>24</sub>H<sub>19</sub>N<sub>2</sub>O [M+H]<sup>+</sup>, 351.1492, found: 351.1535.

4-(4-Chlorophenyl)-1-phenylbenzo[4,5]imidazo[1,2-*a*]pyridine (**3h**), yellow solid (99 mg, 93%); m.p. 212-214 °C; <sup>1</sup>H NMR (600 MHz, CDCl<sub>3</sub>), δ, ppm: 6.63 (*d*, *J* = 9.0 Hz, 1H), 6.79 (*d*, *J* = 6.6 Hz, 1H), 6.99-7.02 (*m*, 1H), 7.43 (*t*, *J* = 7.2 Hz, 1H), 7.53-7.57 (*m*, 3H), 7.60-7.69 (*m*, 5H), 7.98 (*d*, *J* = 7.8 Hz, 1H), 8.06 (*d*, *J* = 9.0 Hz, 2H); <sup>13</sup>C NMR (150 MHz, CDCl<sub>3</sub>), δ, ppm: 112.3, 114.7, 120.1, 120.6, 125.2, 127.5, 128.2, 128.8, 129.1, 129.2, 129.5, 130.1, 130.4, 134.3, 134.5, 135.2, 140.6, 145.0, 148.2; ESI-HRMS, *m/z*: Calcd for C<sub>23</sub>H<sub>16</sub>ClN<sub>2</sub> [M+H]<sup>+</sup>, 355.0997, found: 355.0987.

4-(4-Bromophenyl)-1-phenylbenzo[4,5]imidazo[1,2-*a*]pyridine (**3i**), yellow solid (106 mg, 89%); m.p. 236-238 °C; <sup>1</sup>H NMR (600 MHz, CDCl<sub>3</sub>), δ, ppm: 6.63 (*d*, *J* = 8.4 Hz, 1H), 6.79 (*d*, *J* = 6.6 Hz, 1H), 6.99-7.02 (*m*, 1H), 7.43 (*t*, *J* = 7.2 Hz, 1H), 7.56 (*d*, *J* = 6.6 Hz, 1H), 7.61 (*d*, *J* = 7.8 Hz, 2H), 7.63-7.65 (*m*, 2H), 7.67-7.71 (*m*, 3H), 7.98-8.01 (*m*, 3H); <sup>13</sup>C NMR (150 MHz, CDCl<sub>3</sub>), δ, ppm: 112.3, 114.7, 120.1, 120.6, 122.6, 125.2, 127.5, 128.2, 129.0, 129.2, 129.5, 130.1, 130.7, 131.8, 134.5, 135.7, 140.6, 145.0, 148.2; ESI-HRMS, *m/z*: Calcd for C<sub>23</sub>H<sub>16</sub>BrN<sub>2</sub> [M+H]<sup>+</sup>, 399.0491, found: 399.0502.

4-(4-Nitrophenyl)-1-phenylbenzo[4,5]imidazo[1,2-*a*]pyridine (**3j**), yellow solid (50 mg, 45%); m.p. 268-270 °C; <sup>1</sup>H NMR (600 MHz, CDCl<sub>3</sub>), δ, ppm: 6.65 (*d*, *J* = 9.0 Hz, 1H), 6.85 (*d*, *J* = 7.2 Hz, 1H), 7.02-7.05 (*m*, 1H), 7.46 (*t*, *J* = 7.2 Hz, 1H), 7.62 (*d*, *J* = 6.6 Hz, 2H), 7.65-7.71 (*m*, 4H), 7.99 (*d*, *J* = 8.4 Hz, 1H), 8.34 (*d*, *J* = 9.0 Hz, 2H), 8.43 (*d*, *J* = 9.0 Hz, 2H); <sup>13</sup>C NMR (150 MHz, CDCl<sub>3</sub>), δ, ppm: 112.1, 114.8, 120.2, 121.0, 123.9, 125.5, 126.8, 128.5, 128.9, 129.3, 129.4, 129.9, 130.3, 134.2, 141.9, 143.3, 145.0, 147.5 (C-5), 147.7; ESI-HRMS, *m/z*: Calcd for C<sub>23</sub>H<sub>16</sub>N<sub>3</sub>O<sub>2</sub> [M+H]<sup>+</sup>, 366.1237, found: 366.1284.

4-(3-Methoxyphenyl)-1-phenylbenzo[4,5]imidazo[1,2-*a*]pyridine (**3k**), yellowish solid (99 mg, 94%); m.p. 180-182 °C; <sup>1</sup>H NMR (600 MHz, CDCl<sub>3</sub>), δ, ppm: 3.94 (*s*, 3H), 6.64 (*d*, *J* = 8.4 Hz, 1H), 6.78 (*d*, *J* = 6.6 Hz, 1H), 6.98-7.04 (*m*, 2H), 7.43 (*t*, *J* = 7.2 Hz, 1H), 7.47-7.50 (*m*, 1H), 7.58 (*d*, *J* = 6.6 Hz, 1H), 7.61-7.65 (*m*, 4H), 7.67 (*d*, *J* = 6.6 Hz, 2H), 7.71 (*s*, 1H), 8.00 (*d*, *J* = 8.4 Hz, 1H); <sup>13</sup>C NMR (150 MHz, CDCl<sub>3</sub>), δ, ppm: 55.4, 112.3, 114.0, 114.7, 114.9, 120.4, 120.6, 121.6, 125.0, 127.7, 129.1, 129.2, 129.3, 129.5, 129.6, 130.0, 134.6, 138.2, 140.3, 145.1, 148.5, 159.7; ESI-HRMS, *m/z*: Calcd for C<sub>24</sub>H<sub>19</sub>N<sub>2</sub>O [M+H]<sup>+</sup>, 351.1492, found: 351.1496.

4-(2-Fluorophenyl)-1-phenylbenzo[4,5]imidazo[1,2-*a*]pyridine (**3l**), yellow solid (87 mg, 86%); m.p. 65-67 °C; <sup>1</sup>H NMR (600 MHz, CDCl<sub>3</sub>), δ, ppm: 6.65 (*d*, *J* = 9.0 Hz, 1H), 6.79 (*d*, *J* = 7.2 Hz, 1H), 6.99-7.02 (*m*, 1H), 7.28-7.31 (*m*, 1H), 7.35-7.38 (*m*, 1H), 7.43 (*t*, *J* = 7.2 Hz, 1H), 7.45-7.48 (*m*, 1H), 7.59 (*d*, *J* = 7.2 Hz, 1H), 7.61-7.70 (*m*, 5H), 7.98-8.01 (*m*, 2H); <sup>13</sup>C NMR (150 MHz, CDCl<sub>3</sub>), δ, ppm: 112.0, 114.7, 116.2 (*d*, *J* = 22.5 Hz), 120.2, 120.5, 123.8, 124.3 (*d*, *J* = 3.0 Hz), 124.5 (*d*, *J* = 13.5 Hz), 125.1, 129.1, 129.2, 129.7 (*d*, *J* = 37.5 Hz), 130.0 (*d*, *J* = 25.5 Hz), 130.1, 132.1 (*d*, *J* = 3.0 Hz), 134.5, 140.9, 145.1, 148.4, 160.18 (*d*, *J* = 246.0 Hz); <sup>19</sup>F NMR (564 MHz, CDCl<sub>3</sub>), δ, ppm: -115.1; ESI-HRMS, *m/z*: Calcd for C<sub>23</sub>H<sub>16</sub>FN<sub>2</sub> [M+H]<sup>+</sup>, 339.1292, found: 339.1287.

4-(2-Bromophenyl)-1-phenylbenzo[4,5]imidazo[1,2-*a*]pyridine (**3m**), yellow solid (99 mg, 83%); m.p. 79-81 °C; <sup>1</sup>H NMR (600 MHz, CDCl<sub>3</sub>), δ, ppm: 6.66 (*d*, *J* = 9.0 Hz, 1H), 6.79 (*d*, *J* = 6.6 Hz, 1H), 6.98-7.02 (*m*, 1H), 7.33-7.36 (*m*, 1H), 7.42 (*t*, *J* = 7.8 Hz, 1H), 7.47-7.52 (*m*, 2H), 7.64-7.70 (*m*, 6H, ArH), 7.79 (*d*, *J* = 7.8 Hz, 1H), 7.97 (*d*, *J* = 8.4 Hz, 1H); <sup>13</sup>C NMR (150 MHz, CDCl<sub>3</sub>), δ, ppm: 111.7, 114.7, 120.2, 120.5, 123.7, 125.1, 127.5, 129.0, 129.1, 129.2, 129.6, 129.8, 130.0, 130.1, 132.0, 133.4, 134.5, 137.7, 141.0 (C-6), 145.1, 148.4; ESI-HRMS, *m/z*: Calcd for C<sub>23</sub>H<sub>16</sub>BrN<sub>2</sub> [M+H]<sup>+</sup>, 399.0491, found: 399.0502.

4-(Naphthalen-1-yl)-1-phenylbenzo[4,5]imidazo[1,2-*a*]pyridine (**3n**), yellow solid (89 mg, 80%); m.p. 175-177 °C; <sup>1</sup>H NMR (600 MHz, CDCl<sub>3</sub>), δ, ppm: 6.71 (*d*, *J* = 9.0 Hz, 1H), 6.85 (*d*, *J* = 7.2 Hz, 1H), 7.00-7.04 (*m*, 1H), 7.40-7.45 (*m*, 2H), 7.52-7.56 (*m*, 2H), 7.66-7.73 (*m*, 6H), 6.81 (*d*, *J* = 7.2 Hz, 1H), 7.85 (*d*, *J* = 8.4 Hz, 1H), 6.93 (*d*, *J* = 8.4 Hz, 1H), 7.98 (*d*, *J* = 8.4 Hz, 1H), 8.01 (*d*, *J* = 8.4 Hz, 1H); <sup>13</sup>C NMR (150 MHz, CDCl<sub>3</sub>), δ, ppm: 112.0, 114.7, 120.3, 120.5, 125.1, 125.6, 125.9, 126.0, 126.1, 128.0, 128.5, 128.9, 129.1, 129.2, 129.6, 130.1, 130.3, 132.1, 134.1, 134.6, 134.8, 140.8, 145.1, 149.4; ESI-HRMS, *m/z*: Calcd for C<sub>27</sub>H<sub>19</sub>N<sub>2</sub> [M+H]<sup>+</sup>, 371.1543, found: 371.1554.

Mixture of 7-methyl-1-phenylbenzo[4,5]imidazo[1,2-*a*]pyridine (**4a**) and 8-methyl-1-phenylbenzo[4,5]-imidazo[1,2-*a*]pyridine (**4a'**), inseparable white solid (**4a/4a'** = 3/4; 54 mg, 70%); <sup>1</sup>H NMR (600 MHz, CDCl<sub>3</sub>), δ, ppm: 2.25 (*s*, 3H, **4a**), 2.47 (*s*, 3H, **4a'**), 6.32 (*s*, 1H, **4a**), 6.44 (*d*, *J* = 8.4 Hz, 1H, **4a'**), 6.62-6.64 (*m*, 1H, **4a**; 1H, **4a'**), 6.78 (*d*, *J* = 8.4 Hz, 1H, **4a'**),

7.23 (*d*, *J* = 7.8 Hz, 1H, **4a**), 7.39-7.44 (*m*, 1H, **4a**; 1H, **4a'**), 7.52-7.53 (*m*, 2H, **4a**; 2H, **4a'**), 7.56-7.64 (*m*, 3H, **4a**; 3H, **4a'**), 7.68-7.69 (*m*, 1H, **4a**; 2H, **4a'**), 7.78 (*d*, *J* = 8.4 Hz, 1H, **4a**); <sup>13</sup>C NMR (150 MHz, CDCl<sub>3</sub>), δ, ppm: 21.72 (**4a'**), 21.93 (**4a**), 111.85 (**4a'**), 114.18 (**4a'**), 114.54 (**4a**), 116.66 (**4a'**), 116.85 (**4a'**), 119.14 (**4a**), 122.12 (**4a'**), 126.88 (**4a**), 127.33 (**4a**), 128.61 (**4a'**), 128.88 (**4a'**), 129.00 (**4a/4a'**), 129.04 (**4a**), 129.08 (**4a'**), 129.33 (**4a**), 129.96 (**4a**), 129.99 (**4a'**), 130.09 (**4a**), 134.56 (**4a'**), 134.61 (**4a**), 135.18 (**4a**), 141.13 (**4a'**), 141.16 (**4a**), 143.10 (**4a**), 145.38 (**4a'**), 149.33 (**4a**), 149.65 (**4a'**); ESI-HRMS, *m/z*: Calcd for C<sub>18</sub>H<sub>15</sub>N<sub>2</sub> [M+H]<sup>+</sup>, 259.1230, found: 259.1273.

7-Chloro-1-phenylbenzo[4,5]imidazo[1,2-*a*]pyridine (**4b**), yellow solid (35 mg, 42%); m.p. 160-162 °C; <sup>1</sup>H NMR (600 MHz, CDCl<sub>3</sub>), δ, ppm: 6.47 (*d*, *J* = 9.0 Hz, 1H), 6.71 (*d*, *J* = 6.6 Hz, 1H), 6.92-6.94 (*dd*, *J*<sub>1</sub> = 9.0 Hz, *J*<sub>2</sub> = 1.8 Hz, 1H), 7.50-7.52 (*m*, 1H), 7.54 (*d*, *J* = 7.2 Hz, 2H), 7.60-7.63 (*m*, 2H), 7.65-7.68 (*m*, 1H), 7.72 (*d*, *J* = 9.0 Hz, 1H), 7.87 (*d*, *J* = 1.8 Hz, 1H); <sup>13</sup>C NMR (150 MHz, CDCl<sub>3</sub>), δ, ppm: 112.5, 115.4, 116.8, 119.0, 120.9, 127.8, 128.9, 129.3, 129.8, 130.3, 130.9, 134.1, 141.3, 145.8, 150.3; ESI-HRMS, *m/z*: Calcd for C<sub>17</sub>H<sub>12</sub>ClN<sub>2</sub> [M+H]<sup>+</sup>, 279.0684, found: 279.0710.

8-Chloro-1-phenylbenzo[4,5]imidazo[1,2-*a*]pyridine (**4b'**), yellow solid (36 mg, 43%); m.p. 184-186 °C; <sup>1</sup>H NMR (600 MHz, CDCl<sub>3</sub>), δ, ppm: 6.52 (*d*, *J* = 1.8 Hz, 1H), 6.71 (*d*, *J* = 6.6 Hz, 1H), 7.38-7.40 (*dd*, *J*<sub>1</sub> = 9.0 Hz, *J*<sub>2</sub> = 1.8 Hz, 1H), 7.48-7.51 (*m*, 1H), 7.55 (*d*, *J* = 7.2 Hz, 2H), 7.63-7.66 (*m*, 2H), 7.68-7.73 (*m*, 2H), 7.83 (*d*, *J* = 9.0 Hz, 2H); <sup>13</sup>C NMR (150 MHz, CDCl<sub>3</sub>), δ, ppm: 112.4, 114.7, 117.0, 120.4, 125.7, 125.9, 128.9, 129.3, 129.5, 129.6, 130.4, 133.9, 141.2, 143.5, 150.1; ESI-HRMS, *m/z*: Calcd for C<sub>17</sub>H<sub>12</sub>ClN<sub>2</sub> [M+H]<sup>+</sup>, 279.0684, found: 279.0710.

7,8-Dichloro-1-phenylbenzo[4,5]imidazo[1,2-*a*]pyridine (**4c**), yellowish solid (70 mg, 75%); m.p. 231-233 °C; <sup>1</sup>H NMR (600 MHz, CDCl<sub>3</sub>), δ, ppm: 6.60 (*s*, 1H), 6.72 (*d*, *J* = 7.8 Hz, 1H), 7.51-7.53 (*m*, 3H), 7.63-7.66 (*m*, 2H), 7.69-7.70 (*m*, 2H), 7.95 (*s*, 1H); <sup>13</sup>C NMR (150 MHz, CDCl<sub>3</sub>), δ, ppm: 112.7, 115.9, 116.9, 120.3, 123.9, 128.1, 128.7, 129.4, 129.5, 130.3, 130.6, 133.5, 141.3, 144.2, 150.8; ESI-HRMS, *m/z*: Calcd for C<sub>17</sub>H<sub>11</sub>Cl<sub>2</sub>N<sub>2</sub> [M+H]<sup>+</sup>, 313.0294, found: 313.0289.

7,8-Dichloro-4-methyl-1-phenylbenzo[4,5]imidazo[1,2-*a*]pyridine (**4d**), yellowish solid (70 mg, 72%); m.p. 253-255 °C; <sup>1</sup>H NMR (600 MHz, CDCl<sub>3</sub>), δ, ppm: 2.74 (*s*, 3H), 6.63 (*s*, 1H), 6.67 (*d*, *J* = 7.2 Hz, 1H), 7.34 (*d*, *J* = 7.2 Hz, 1H), 7.52 (*d*, *J* = 7.2 Hz, 2H), 7.63-7.65 (*m*, 2H), 7.68-7.70 (*t*, *J* = 7.2 Hz, 1H), 8.03 (*s*, 1H); <sup>13</sup>C NMR (150 MHz, CDCl<sub>3</sub>), δ, ppm: 17.6, 112.7, 115.9, 120.5, 123.8, 128.6, 128.7, 129.0, 129.1, 129.4, 130.4, 130.4, 133.7, 138.9, 143.9, 151.3; ESI-HRMS, *m/z*: Calcd for C<sub>18</sub>H<sub>13</sub>Cl<sub>2</sub>N<sub>2</sub> [M+H]<sup>+</sup>, 327.0450, found: 327.0449.

7,8-Difluoro-1-phenylbenzo[4,5]imidazo[1,2-*a*]pyridine (**4e**), yellowish solid (56 mg, 67%); m.p. 177-179 °C; <sup>1</sup>H NMR (600 MHz, CDCl<sub>3</sub>), δ, ppm: 6.31-6.33 (*m*, 1H), 6.70 (*d*, *J* =

6.6 Hz, 1H), 7.47-7.49 (*m*, 1H), 7.53 (*d*,  $J = 7.2$  Hz, 2H), 7.71-7.65 (*m*, 3H), 7.67-7.70 (*m*, 2H);  $^{13}\text{C}$  NMR (150 MHz,  $\text{CDCl}_3$ ),  $\delta$ , ppm: 102.7 (*d*,  $J = 24.0$  Hz), 106.1 (*d*,  $J = 19.5$  Hz), 112.4, 116.8, 124.0 (*d*,  $J = 10.5$  Hz), 128.9, 129.3, 129.4, 130.5, 133.6, 140.7 (*d*,  $J = 9.0$  Hz), 140.8, 145.8 (*dd*,  $J_1 = 241.5$  Hz,  $J_2 = 15.0$  Hz), 149.6 (*dd*,  $J_1 = 244.5$  Hz,  $J_2 = 15.0$  Hz), 150.7 (*d*,  $J = 3.0$  Hz);  $^{19}\text{F}$  NMR (564 MHz,  $\text{CDCl}_3$ ),  $\delta$ , ppm: -142.3, -138.2; ESI-HRMS,  $m/z$ : Calcd for  $\text{C}_{17}\text{H}_{11}\text{F}_2\text{N}_2$   $[\text{M}+\text{H}]^+$ , 281.0885, found: 281.0885.

7,8-Dimethyl-1-phenylbenzo[4,5]imidazo[1,2-*a*]pyridine (**4f**), yellowish waxy (64 mg, 78%);  $^1\text{H}$  NMR (600 MHz,  $\text{CDCl}_3$ ),  $\delta$ , ppm: 2.15 (*s*, 3H), 2.39 (*s*, 3H), 6.31 (*s*, 1H), 6.65 (*d*,  $J = 7.2$  Hz, 1H), 7.41-7.44 (*m*, 1H), 7.56 (*d*,  $J = 7.2$  Hz, 2H), 7.60-7.63 (*m*, 2H), 7.65-7.70 (*m*, 3H);  $^{13}\text{C}$  NMR (150 MHz,  $\text{CDCl}_3$ ),  $\delta$ , ppm: 20.5, 20.7, 111.6, 114.7, 116.7, 119.4, 127.7, 128.4, 129.0, 129.1, 129.5, 129.9, 134.6, 134.7, 141.0, 143.7, 149.2; ESI-HRMS,  $m/z$ : Calcd for  $\text{C}_{19}\text{H}_{17}\text{N}_2$   $[\text{M}+\text{H}]^+$ , 273.1386, found: 273.1422.

Mixture of 4-(4-chlorophenyl)-7-methyl-1-phenylbenzo[4,5]imidazo[1,2-*a*]pyridine (**4g**) and 4-(4-chlorophenyl)-8-methyl-1-phenylbenzo[4,5]imidazo[1,2-*a*]pyridine (**4g'**), inseparable yellowish solid (**4g:4g'** = 1:1; 88 mg, 80%);  $^1\text{H}$  NMR (600 MHz,  $\text{CDCl}_3$ ),  $\delta$ , ppm: 2.29 (*s*, 3H, **4g**), 2.50 (*s*, 3H, **4g'**), 6.39 (*s*, 1H, **4g**), 6.51 (*d*,  $J = 8.4$  Hz, 1H, **4g**), 6.73-6.75 (*m*, 1H, **4g**; 1H, **4g'**), 6.84 (*d*,  $J = 8.4$  Hz, 1H, **4g**), 7.27 (*d*,  $J = 8.4$  Hz, 1H, **4g'**), 4.84-4.52 (*m*, 1H, **4g**; 1H, **4g'**), 7.52-7.54 (*m*, 2H, **4g**; 2H, **4g'**), 7.58-7.70 (*m*, 5H, **4g**; 5H, **4g'**), 7.77 (*s*, 1H, **4g'**), 7.87 (*d*,  $J = 8.4$  Hz, 1H, **4g'**), 8.05-8.06 (*m*, 2H, **4g**; 2H, **4g'**);  $^{13}\text{C}$  NMR (150 MHz,  $\text{CDCl}_3$ ),  $\delta$ , ppm: 21.7 (**4g**), 22.0 (**4g'**), 112.0 (**4g'**), 114.2 (**4g**), 114.6 (**4g'**), 119.6 (**4g**), 119.6 (**4g'**), 122.3 (**4g**), 126.9 (**4g**), 126.9 (**4g'**), 127.2 (**4g'**), 127.6 (**4g**), 127.9 (**4g**), 128.1 (**4g'**), 128.8 (**4g/4g'**), 129.0 (**4g**), 129.0 (**4g'**), 129.1 (**4g**), 129.1 (**4g'**), 129.6 (**4g'**), 130.0 (**4g**), 130.0 (**4g'**), 130.4 (**4g**), 130.4 (**4g**), 130.4 (**4g'**), 134.2 (**4g**), 134.5 (**4g**), 134.6 (**4g'**), 135.2 (**4g**), 135.3 (**4g'**), 140.4 (**4g**), 140.4 (**4g'**), 143.2 (**4g**), 145.5 (**4g'**), 148.0 (**4g**), 148.3 (**4g'**); ESI-HRMS,  $m/z$ : Calcd for  $\text{C}_{24}\text{H}_{18}\text{ClN}_2$   $[\text{M}+\text{H}]^+$ , 369.1153, found: 369.1192.

4-(4-Chlorophenyl)-7,8-difluoro-1-phenylbenzo[4,5]imidazo[1,2-*a*]pyridine (**4h**), yellow solid (78 mg, 67%); m.p. 242-244 °C;  $^1\text{H}$  NMR (600 MHz,  $\text{CDCl}_3$ ),  $\delta$ , ppm: 6.36-6.39 (*m*, 1H), 6.82 (*d*,  $J = 7.2$  Hz, 1H), 7.54-7.59 (*m*, 5H), 7.66-7.73 (*m*, 4H), 8.02 (*d*,  $J = 8.4$  Hz, 2H);  $^{13}\text{C}$  NMR (150 MHz,  $\text{CDCl}_3$ ),  $\delta$ , ppm: 102.7 (*d*,  $J = 24.0$  Hz), 106.1 (*d*,  $J = 19.5$  Hz), 112.7, 124.3 (*d*,  $J = 10.5$  Hz), 127.5, 128.3, 128.9, 129.0, 129.5, 130.3, 130.6, 133.6, 134.6, 134.8, 140.0, 140.8 (*d*,  $J = 10.5$  Hz), 146.0 (*dd*,  $J_1 = 240.0$  Hz,  $J_2 = 15.0$  Hz), 149.5 (*d*,  $J = 3.0$  Hz), 149.6 (*dd*,  $J_1 = 244.5$  Hz,  $J_2 = 15.0$  Hz);  $^{19}\text{F}$  NMR (564 MHz,  $\text{CDCl}_3$ ),  $\delta$ , ppm: -141.9, -138.0; ESI-HRMS,  $m/z$ : Calcd for  $\text{C}_{23}\text{H}_{14}\text{ClF}_2\text{N}_2$   $[\text{M}+\text{H}]^+$ , 391.0808, found: 391.0808.

4-(4-Chlorophenyl)-7,8-dimethyl-1-phenylbenzo[4,5]imidazo[1,2-*a*]pyridine (**4i**), yellowish solid (94 mg, 82%); m.p. 238-240 °C;  $^1\text{H}$  NMR (600 MHz,  $\text{CDCl}_3$ ),  $\delta$ , ppm: 2.17 (*s*, 3H), 2.39 (*s*, 3H), 6.36 (*s*, 1H), 6.72 (*d*,  $J = 6.6$  Hz, 1H), 7.47 (*d*,  $J = 6.6$  Hz, 1H), 7.52 (*d*,  $J = 8.4$

Hz, 2H), 7.59 (*d*, *J* = 7.2 Hz, 2H), 7.62-7.64 (*m*, 2H), 7.68 (*d*, *t* = 7.2 Hz, 1H), 7.75 (*s*, 1H), 8.06 (*d*, *J* = 8.4 Hz, 2H); <sup>13</sup>C NMR (150 MHz, CDCl<sub>3</sub>), δ, ppm: 20.5, 20.8, 111.8, 114.7, 119.9, 126.7, 127.9, 128.0, 128.8, 129.0, 129.1, 129.8, 129.9, 130.4, 134.1, 134.7, 135.4, 140.2, 143.9, 147.8; ESI-HRMS, *m/z*: Calcd for C<sub>25</sub>H<sub>20</sub>ClN<sub>2</sub> [M+H]<sup>+</sup>, 383.1310, found: 383.1308.

Mixture of (*Z*)-3-(2-methyl-1*H*-imidazol-1-yl)-3-phenylacrylaldehyde and (*E*)-3-(2-methyl-1*H*-imidazol-1-yl)-3-phenylacrylaldehyde (**4j**), inseparable colorless waxy (4:1 (*E/Z*), 46 mg, 72%); <sup>1</sup>H NMR (600 MHz, CDCl<sub>3</sub>), δ, ppm: 2.14 (*s*, 3H, *Z*), 2.20 (*s*, 3H, *E*), 6.23 (*d*, *J* = 7.8 Hz, 1H, *Z*), 6.63 (*d*, *J* = 7.8 Hz, 1H, *E*), 6.85 (*d*, *J* = 1.8 Hz, 1H, *Z*), 6.99 (*d*, *J* = 1.8 Hz, 1H, *Z*), 7.05 (*d*, *J* = 1.2 Hz, 1H, *E*), 7.13 (*d*, *J* = 1.2 Hz, 1H, *E*), 7.26 (*d*, *J* = 7.2 Hz, 2H, *E*), 7.35 (*d*, *J* = 8.4 Hz, 2H, *Z*), 7.42 (*m*, 2H, *E*), 7.49-7.53 (*m*, 1H, *E*; 2H, *Z*), 7.57-7.60 (*m*, 1H, *Z*), 9.41 (*d*, *J* = 7.8 Hz, 1H, *E*), 9.58 (*d*, *J* = 7.8 Hz, 1H, *Z*); <sup>13</sup>C NMR (150 MHz, CDCl<sub>3</sub>), δ, ppm: 13.5 (*E*), 15.2 (*Z*), 120.8 (*Z*), 122.6 (*E*), 123.0 (*Z*), 123.8 (*E*), 126.9 (*E*), 128.6 (*Z*), 128.9 (*E*), 129.1 (*Z*), 129.5 (*E*), 130.5 (*Z*), 131.9 (*Z*), 132.4 (*E*), 132.7 (*Z*), 134.1 (*E*), 146.0 (*Z*), 146.2 (*E*), 152.3 (*E*), 155.0 (*Z*), 190.2 (*E*), 191.7 (*Z*); ESI-HRMS, *m/z*: Calcd for C<sub>13</sub>H<sub>13</sub>N<sub>2</sub>O [M+H]<sup>+</sup>, 213.1022, found: 213.1021.

Mixture of (*Z*)-3-(2-ethyl-1*H*-imidazol-1-yl)-3-phenylacrylaldehyde and (*E*)-3-(2-ethyl-1*H*-imidazol-1-yl)-3-phenylacrylaldehyde (**4k**), inseparable colorless waxy (10:4 (*E/Z*), 48 mg, 70%); <sup>1</sup>H NMR (600 MHz, CDCl<sub>3</sub>), δ, ppm: 1.16-1.20 (*m*, 3H, *Z*; 3H, *E*), 2.36-2.40 (*q*, *J* = 7.2 Hz, 2H, *E*), 2.43-2.47 (*q*, *J* = 7.2 Hz, 2H, *Z*), 6.22 (*d*, *J* = 7.2 Hz, 1H, *E*), 6.62 (*d*, *J* = 7.2 Hz, 1H, *E*), 6.84 (*d*, *J* = 1.2 Hz, 1H, *Z*), 7.00 (*d*, *J* = 1.2 Hz, 1H, *Z*), 7.03 (*d*, *J* = 1.2 Hz, 1H, *E*), 7.14 (*d*, *J* = 1.2 Hz, 1H, *E*), 7.24 (*d*, *J* = 7.2 Hz, 2H, *E*), 7.33 (*d*, *J* = 7.2 Hz, 2H, *Z*), 7.40-7.42 (*m*, 2H, *E*), 7.47-7.49 (*m*, 2H, *Z*; 1H, *E*), 7.55-7.58 (*m*, 1H, *Z*), 9.37 (*d*, *J* = 7.2 Hz, 1H, *E*), 9.58 (*d*, *J* = 7.2 Hz, 1H, *Z*); <sup>13</sup>C NMR (150 MHz, CDCl<sub>3</sub>), δ, ppm: 12.0 (*Z*), 12.1 (*E*), 20.6 (*E*), 21.7 (*Z*), 120.9 (*Z*), 122.4 (*E*), 123.5 (*Z*), 123.8 (*E*), 126.9 (*E*), 128.5 (*Z*), 128.8 (*E*), 129.1 (*Z*), 129.4 (*E*), 130.4 (*Z*), 132.0 (*Z*), 132.4 (*E*), 132.9 (*Z*), 134.2 (*E*), 150.8 (*Z*), 151.0 (*E*), 152.2 (*E*), 154.9 (*Z*), 190.2 (*E*), 191.7 (*Z*); ESI-HRMS, *m/z*: Calcd for C<sub>14</sub>H<sub>15</sub>N<sub>2</sub>O [M+H]<sup>+</sup>, 227.1179, found: 227.1177.

3-(2-Methyl-1*H*-benzo[d]imidazol-1-yl)-3-phenylacrylaldehyde (**3aa**), inseparable yellowish waxy (9:10 (*E/Z*), 62 mg, 71%); <sup>1</sup>H NMR (600 MHz, CDCl<sub>3</sub>), δ, ppm: 2.30 (*s*, 3H, *Z*), 2.42 (*s*, 3H, *E*), 6.40 (*d*, *J* = 7.8 Hz, 1H, *Z*), 6.84 (*d*, *J* = 7.2 Hz, 1H, *E*), 7.07 (*d*, *J* = 8.4 Hz, 1H, *Z*), 7.09 (*d*, *J* = 8.4 Hz, 1H, *E*), 7.14-7.17 (*m*, 1H, *Z*), 7.18-7.21 (*m*, 1H, *E*), 7.22-7.30 (*m*, 4H, 3H, *E*; 1H, *Z*), 7.35-7.41 (*m*, 2H, *E*; 2H, *Z*), 7.48-7.51 (*m*, 1H, *E*; 2H, *Z*), 7.57-7.60 (*m*, 1H, *Z*), 7.71 (*d*, *J* = 7.8 Hz, 1H, *Z*), 7.78 (*d*, *J* = 7.8 Hz, 1H, *E*), 9.33 (*d*, *J* = 7.8 Hz, 1H, *E*), 9.81 (*d*, *J* = 7.8 Hz, 1H, *Z*); <sup>13</sup>C NMR (150 MHz, CDCl<sub>3</sub>), δ, ppm: 14.4 (*E*), 15.7 (*Z*), 110.0 (*Z*), 111.0 (*E*), 119.5 (*Z*), 119.6 (*E*), 123.3 (*E*), 123.4 (*Z*), 123.5 (*Z*), 123.7 (*E*), 125.0 (*Z*), 125.7 (*E*), 126.8 (*Z*), 129.4 (*E*), 129.6 (*Z*), 130.3 (*E*), 132.1 (*Z*), 132.4 (*E*), 133.1 (*Z*), 133.7 (*E*), 135.3 (*E*),

137.2 (*Z*), 142.7 (*E*), 143.0 (*Z*), 150.7 (*E*), 151.8 (*Z*), 151.9 (*Z*), 153.5 (*E*), 189.9 (*E*), 191.7 (*Z*); ESI-HRMS, *m/z*: Calcd for C<sub>17</sub>H<sub>15</sub>N<sub>2</sub>O [M+H]<sup>+</sup>, 263.1179, found: 263.1200.

(*E*)-1-Methyl-2-(4-phenylbut-1-en-3-yn-1-yl)-1*H*-benzo[*d*]imidazole (**3ab**), yellowish solid (40 mg, 52%); m.p. 153-155 °C; <sup>1</sup>H NMR (600 MHz, CDCl<sub>3</sub>), δ, ppm: 3.86 (*s*, 3H), 7.08 (*d*, *J* = 15.6 Hz, 1H), 7.24 (*d*, *J* = 15.6 Hz, 1H), 7.30-7.32 (*m*, 2H), 7.34-7.36 (*m*, 1H), 7.37-7.40 (*m*, 3H), 7.53-7.55 (*m*, 2H), 7.76-7.78 (*m*, 1H); <sup>13</sup>C NMR (150 MHz, CDCl<sub>3</sub>), δ, ppm: 29.8, 88.4, 95.3, 109.3, 116.7, 119.7, 122.8, 122.9, 123.1, 125.2, 128.5, 128.8, 131.8, 136.1, 143.1, 149.8; ESI-HRMS, *m/z*: Calcd for C<sub>18</sub>H<sub>15</sub>N<sub>2</sub> [M+H]<sup>+</sup>, 259.1230, found: 259.1273.

## NMR Spectra for All Compounds 3a-3n, 4a-4k, 3aa and 3ab

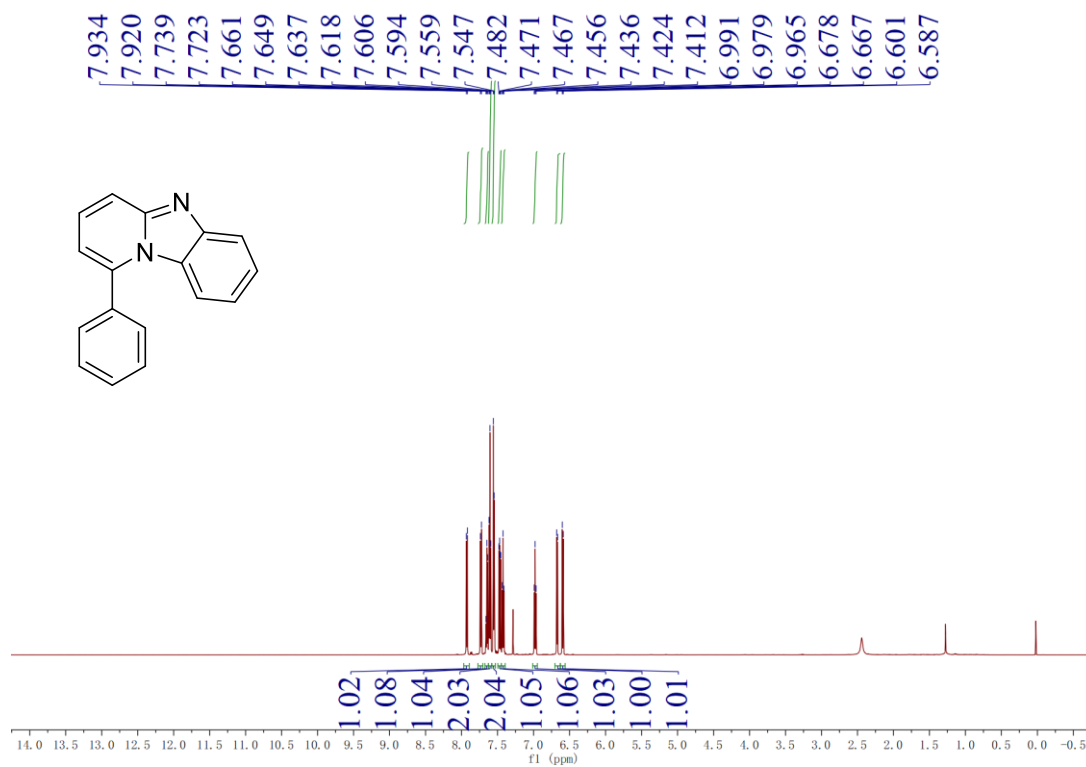

<sup>1</sup>H NMR spectrum of compound **3a**

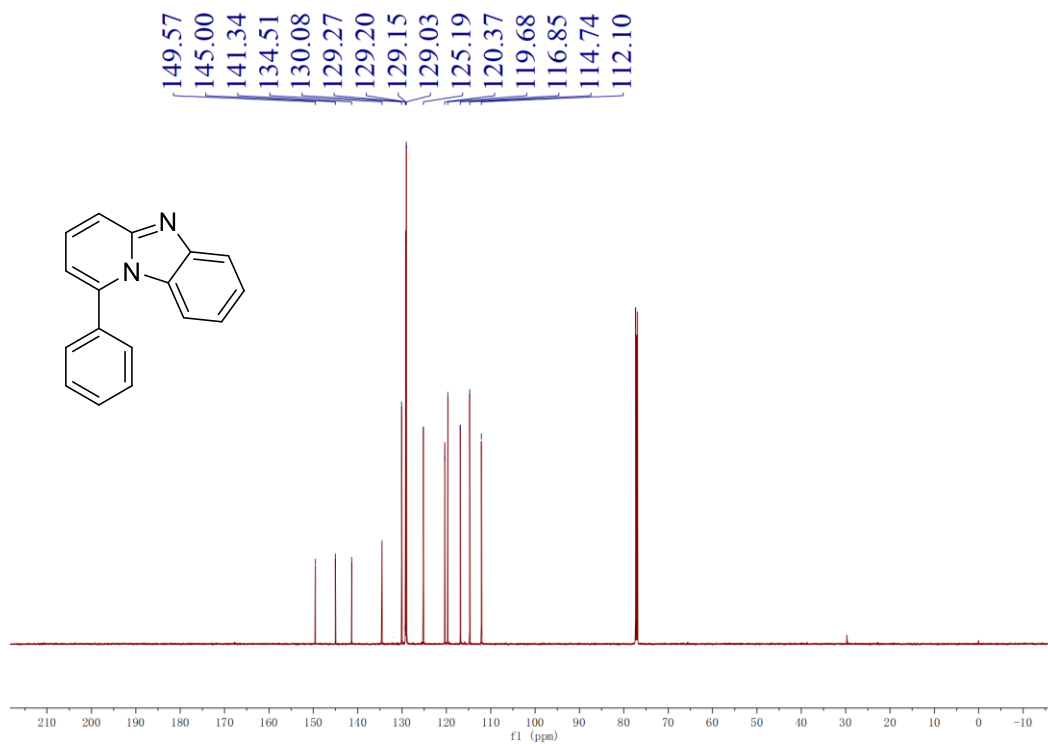

<sup>13</sup>C NMR spectrum of compound **3a**

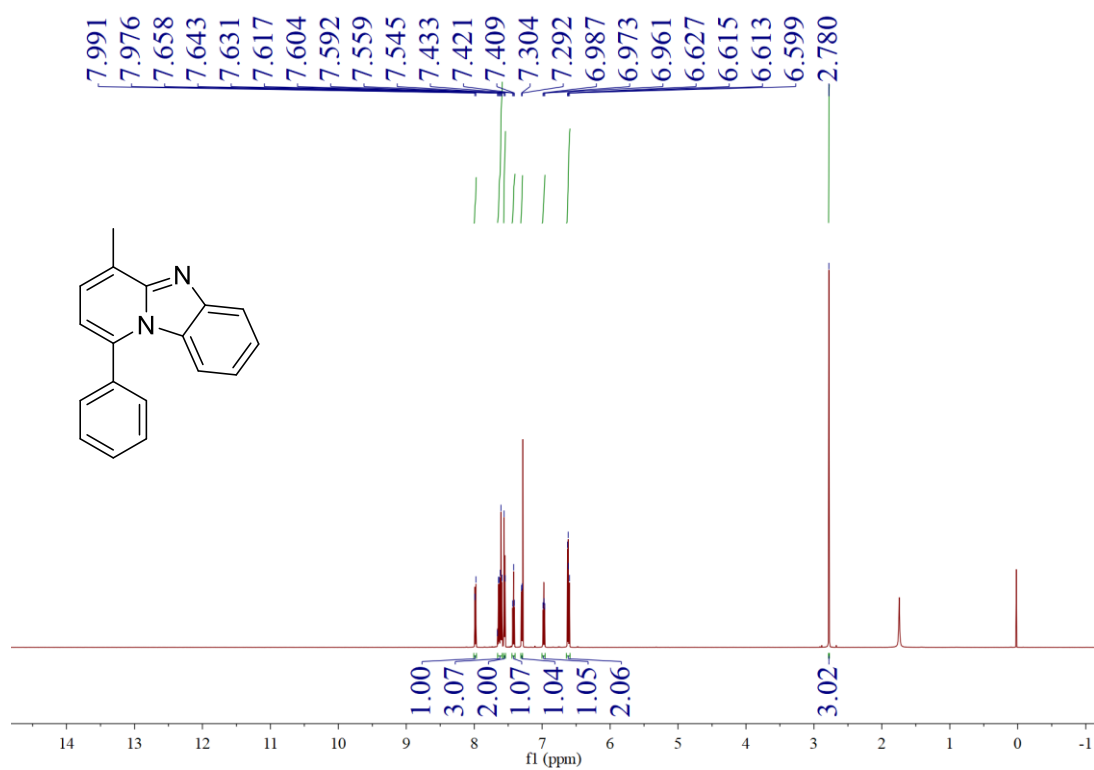

<sup>1</sup>H NMR spectrum of compound 3b

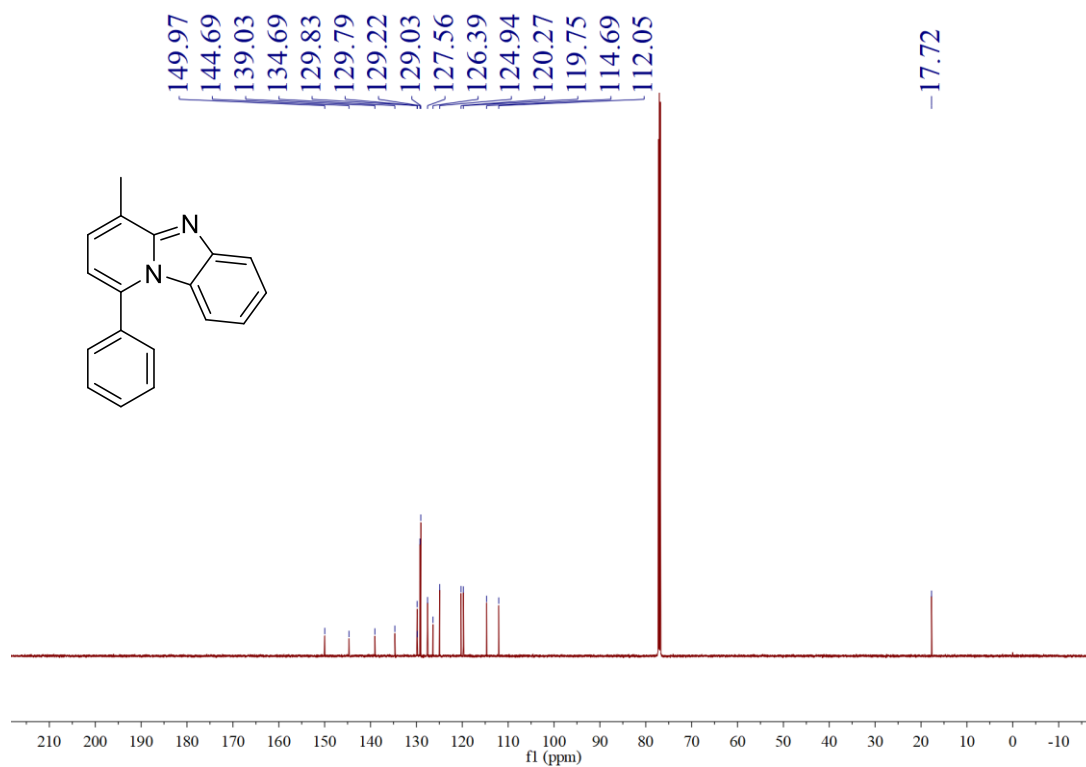

<sup>13</sup>C NMR spectrum of compound 3b



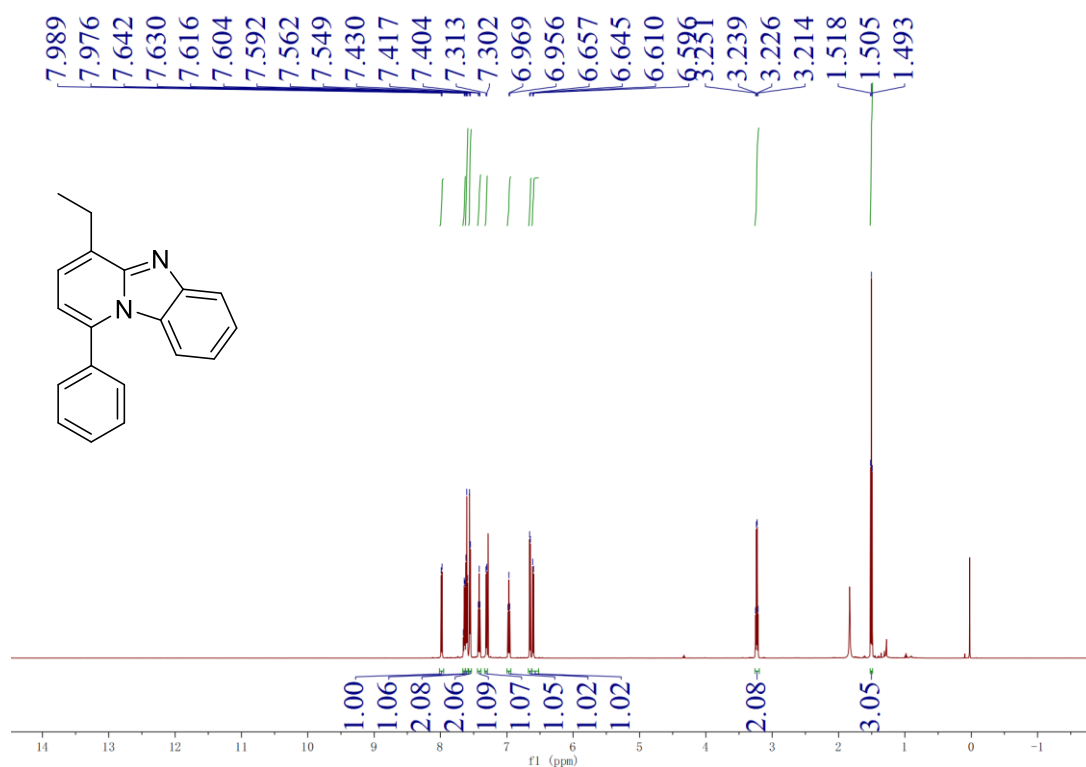

<sup>1</sup>H NMR spectrum of compound **3c**

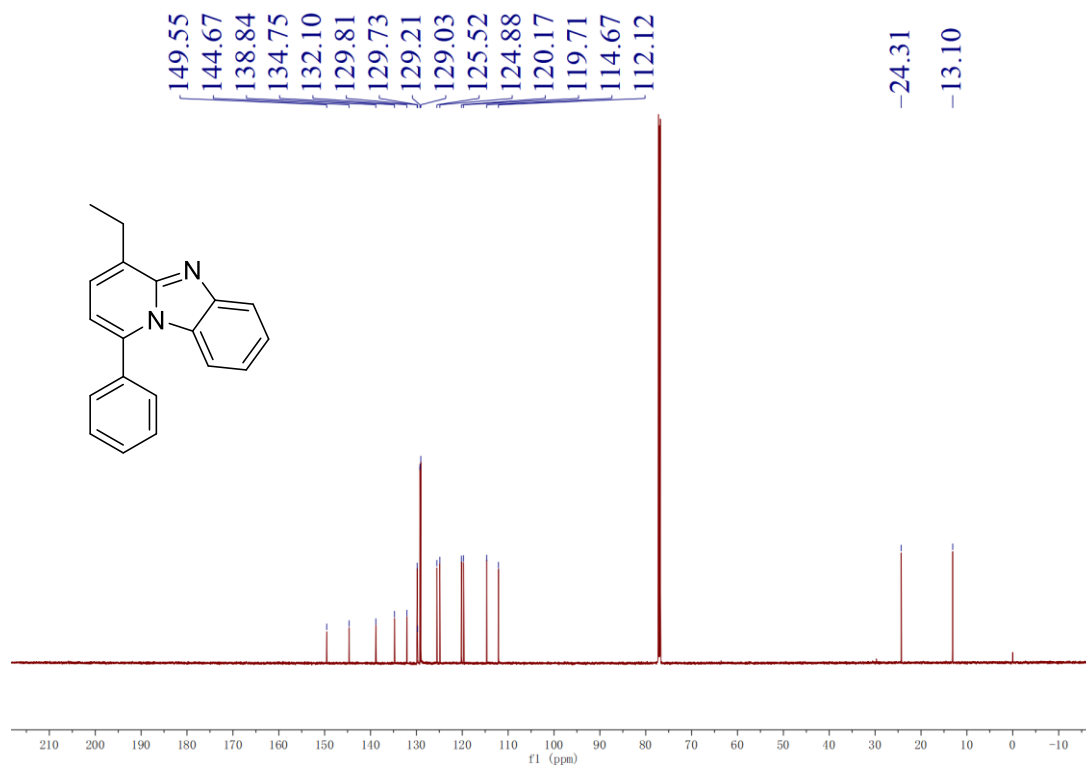

<sup>13</sup>C NMR spectrum of compound **3c**

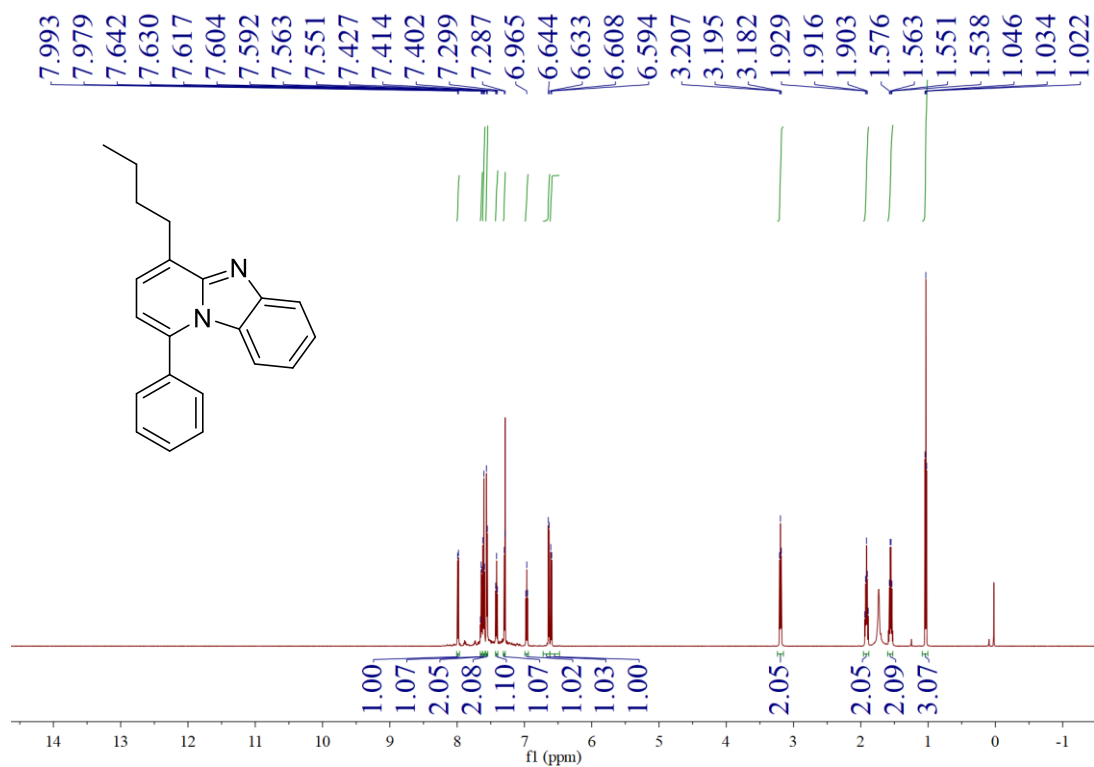

<sup>1</sup>H NMR spectrum of compound **3d**

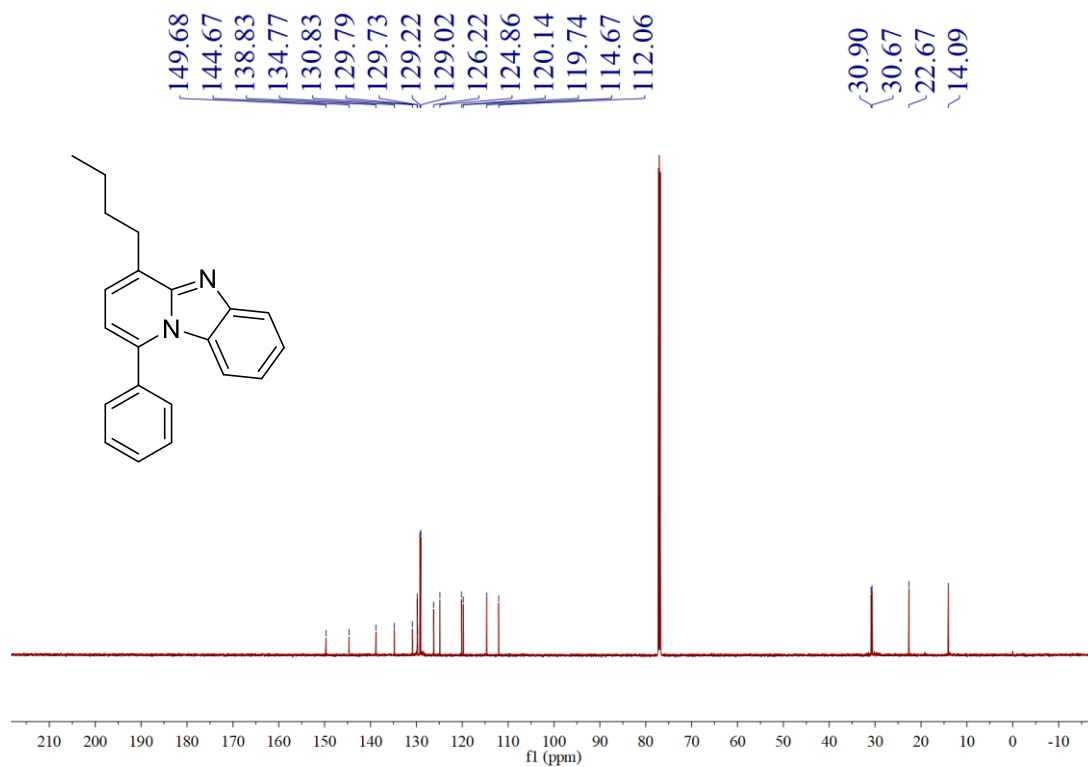

<sup>13</sup>C NMR spectrum of compound **3d**

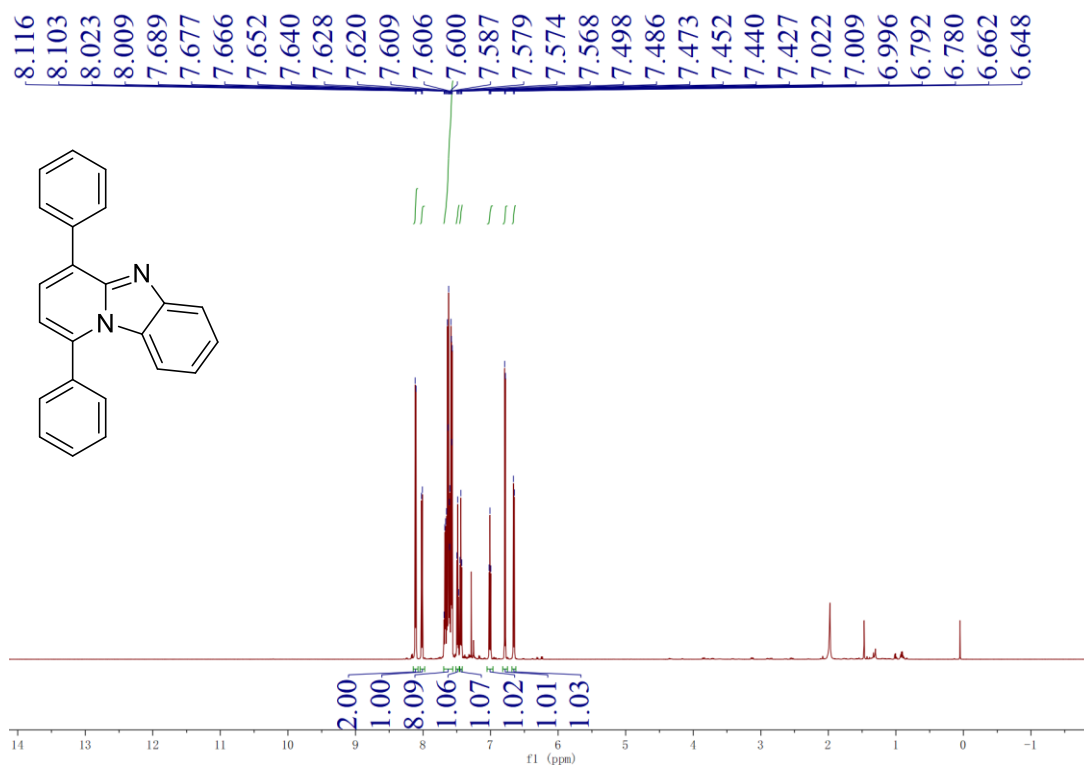

<sup>1</sup>H NMR spectrum of compound **3e**

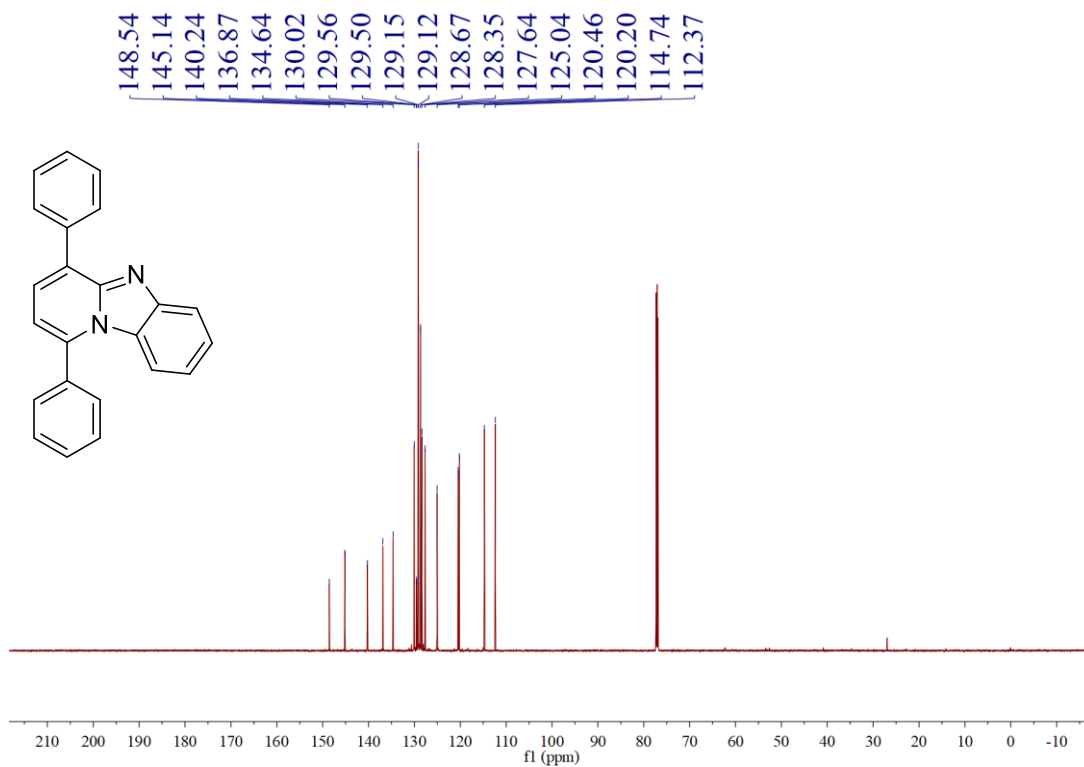

<sup>13</sup>C NMR spectrum of compound **3e**

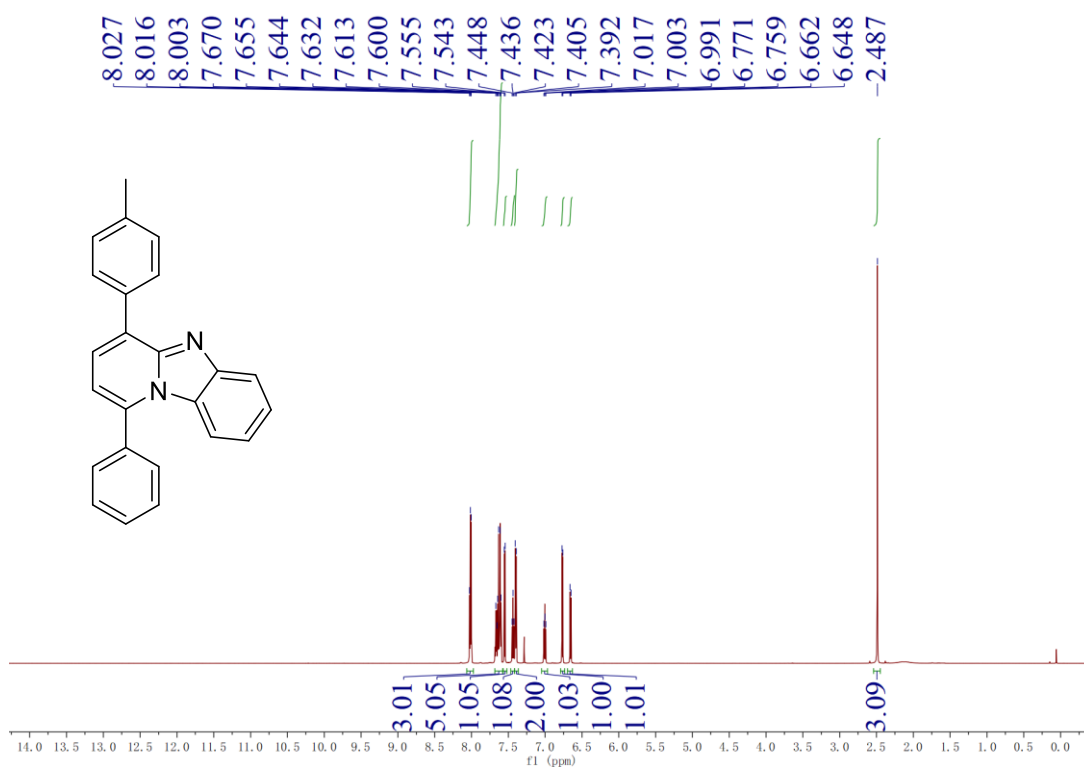

<sup>1</sup>H NMR spectrum of compound 3f

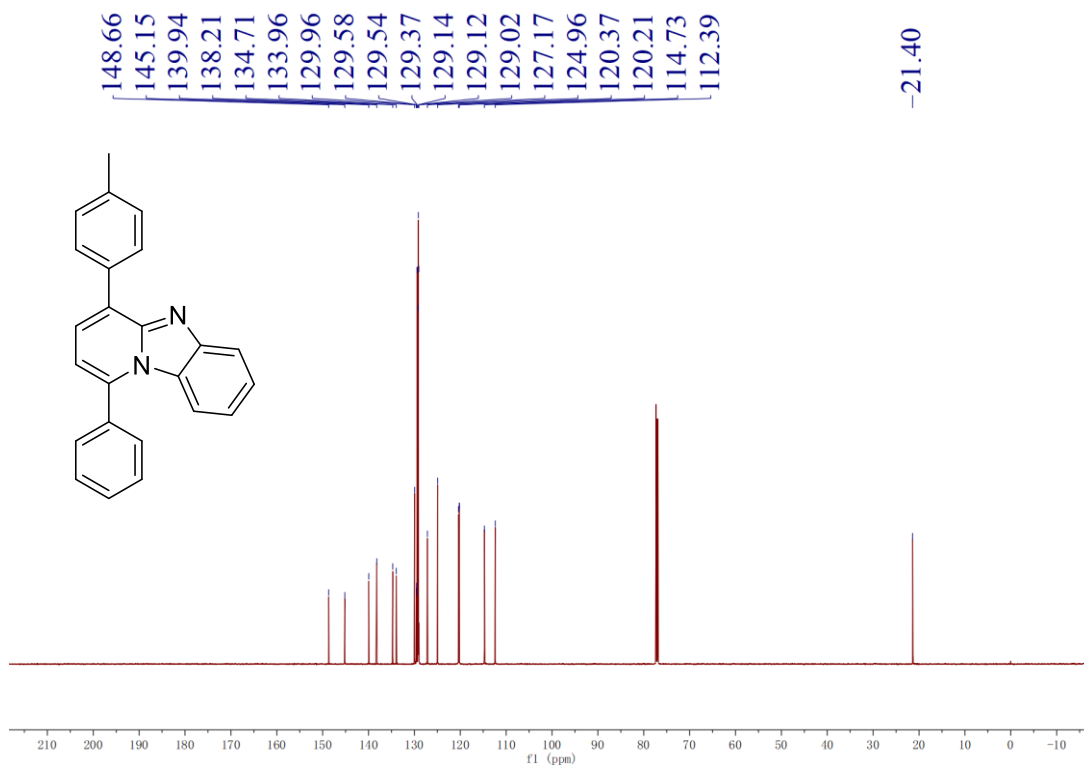

<sup>13</sup>C NMR spectrum of compound 3f

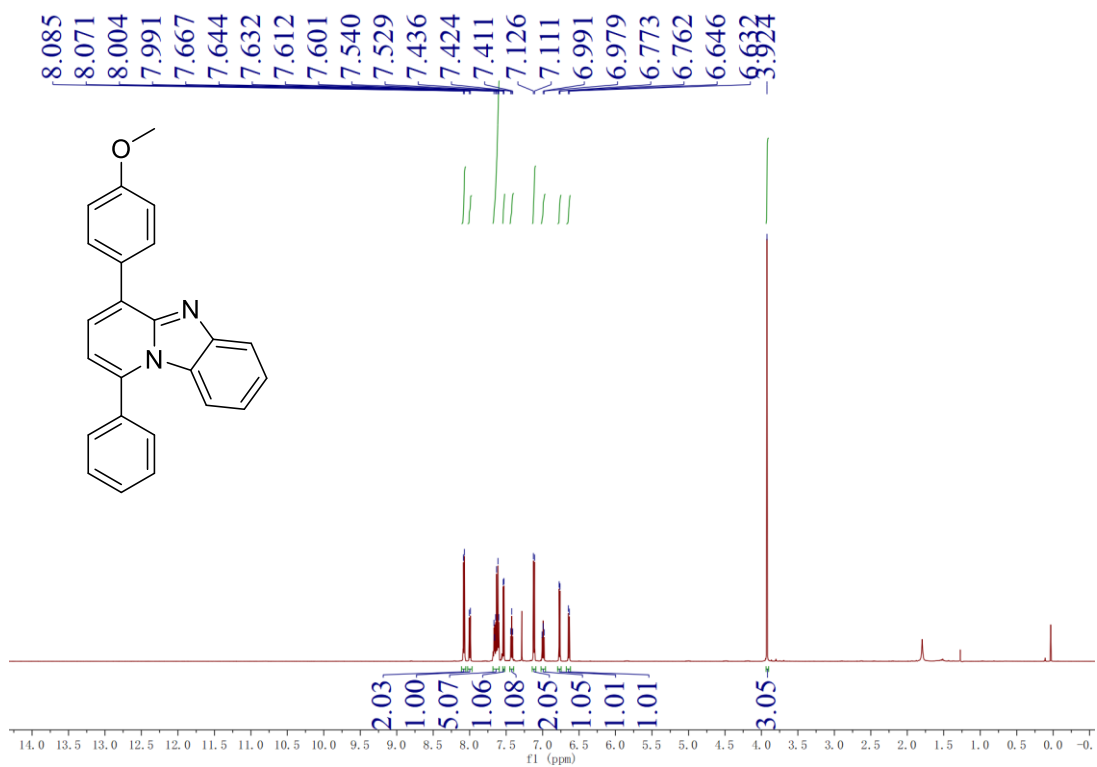

**<sup>1</sup>H NMR spectrum of compound **3g****

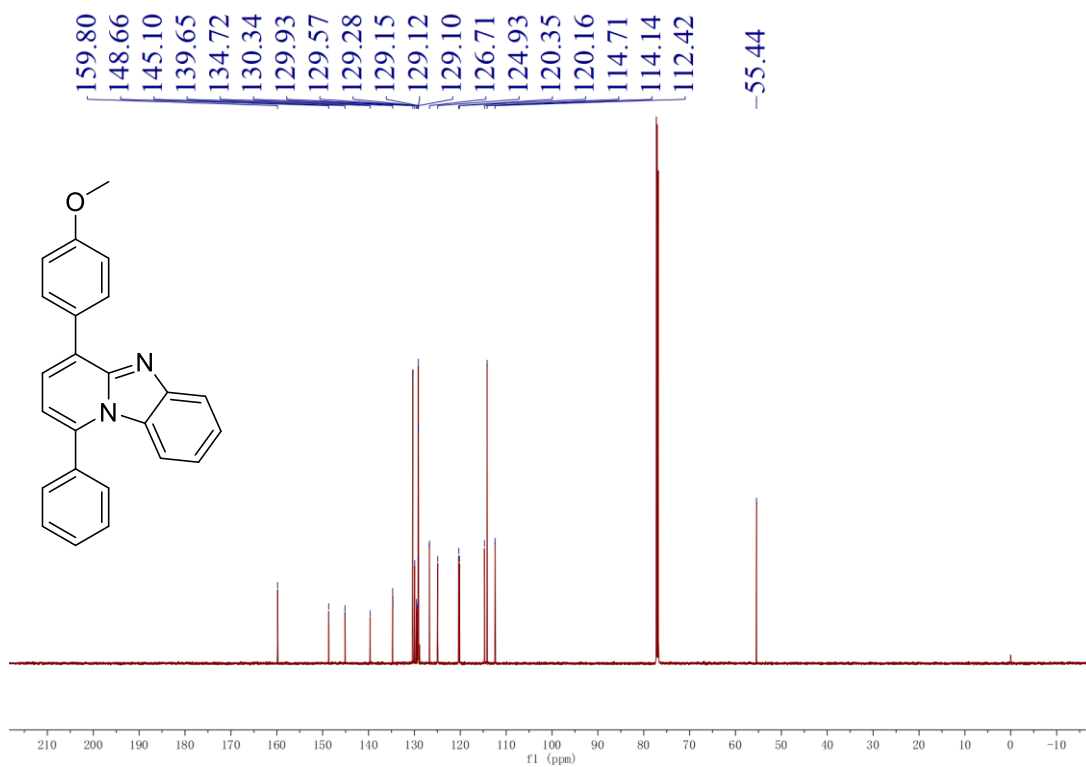

**<sup>13</sup>C NMR spectrum of compound **3g****

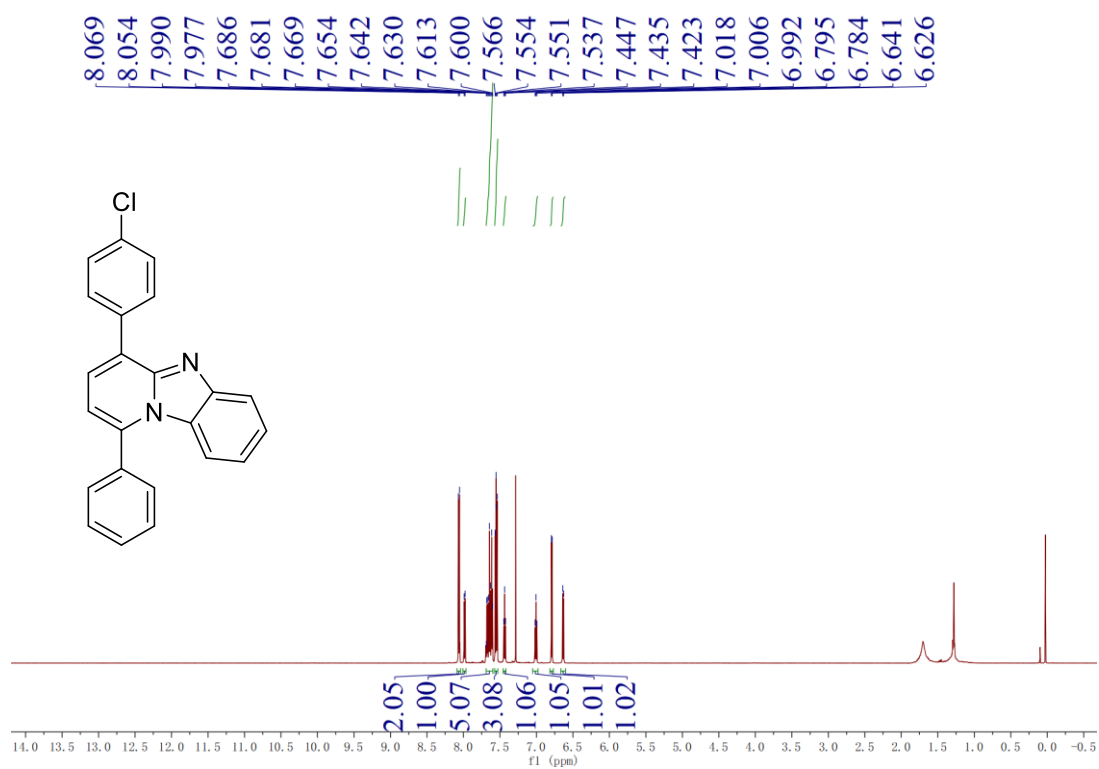

<sup>1</sup>H NMR spectrum of compound **3h**

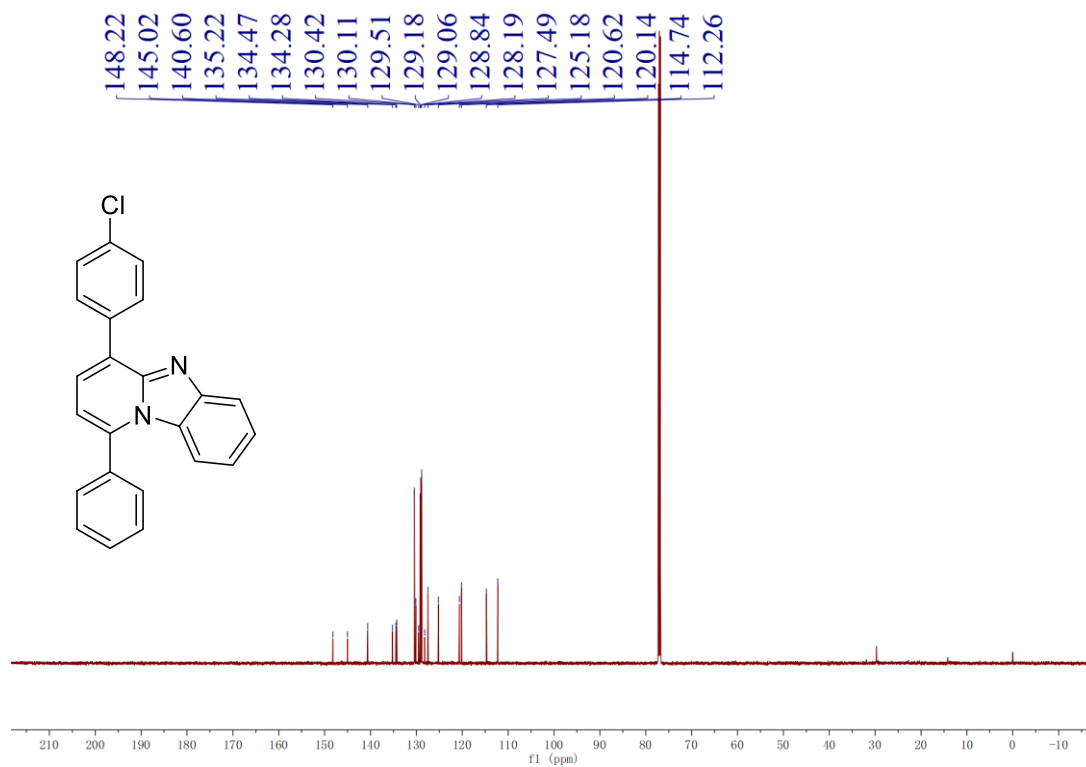

<sup>13</sup>C NMR spectrum of compound **3h**

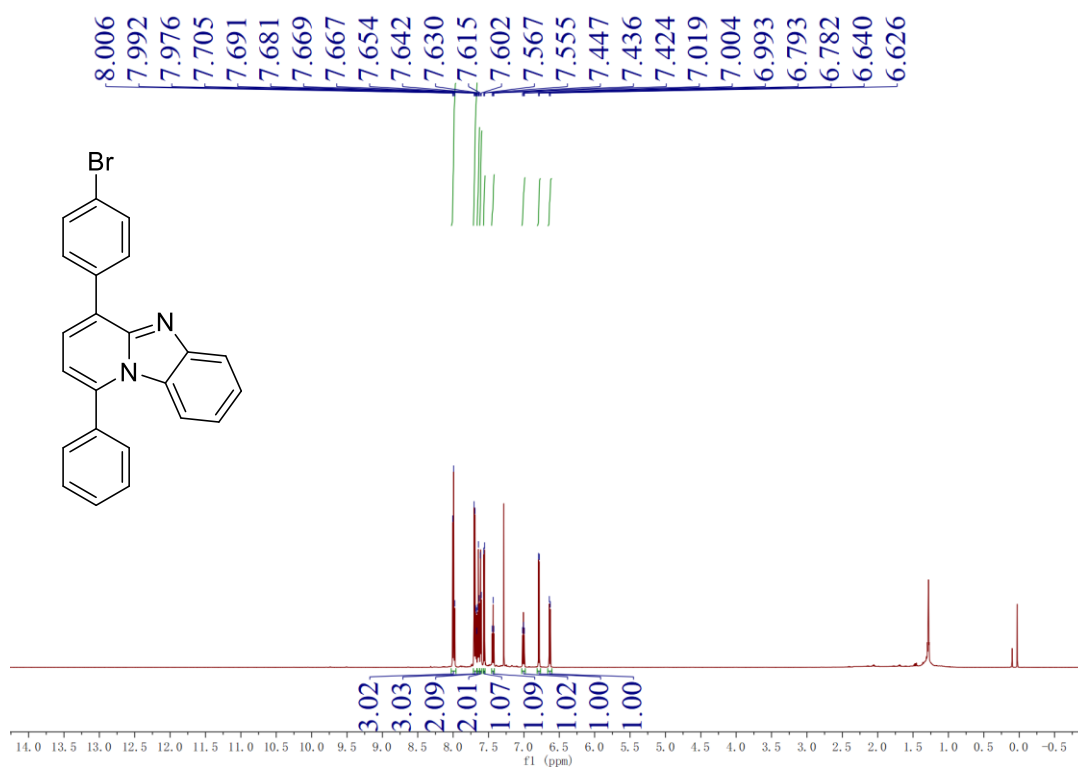

**<sup>1</sup>H NMR spectrum of compound 3i**

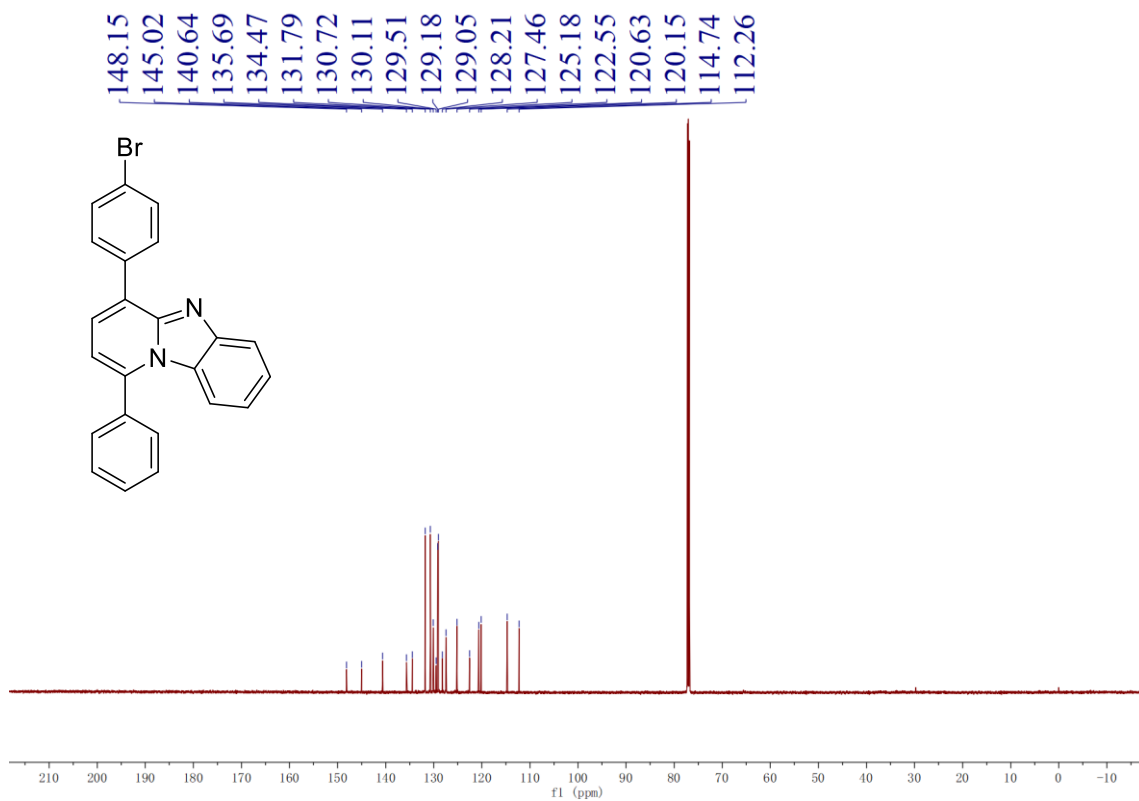

**<sup>13</sup>C NMR spectrum of compound 3i**

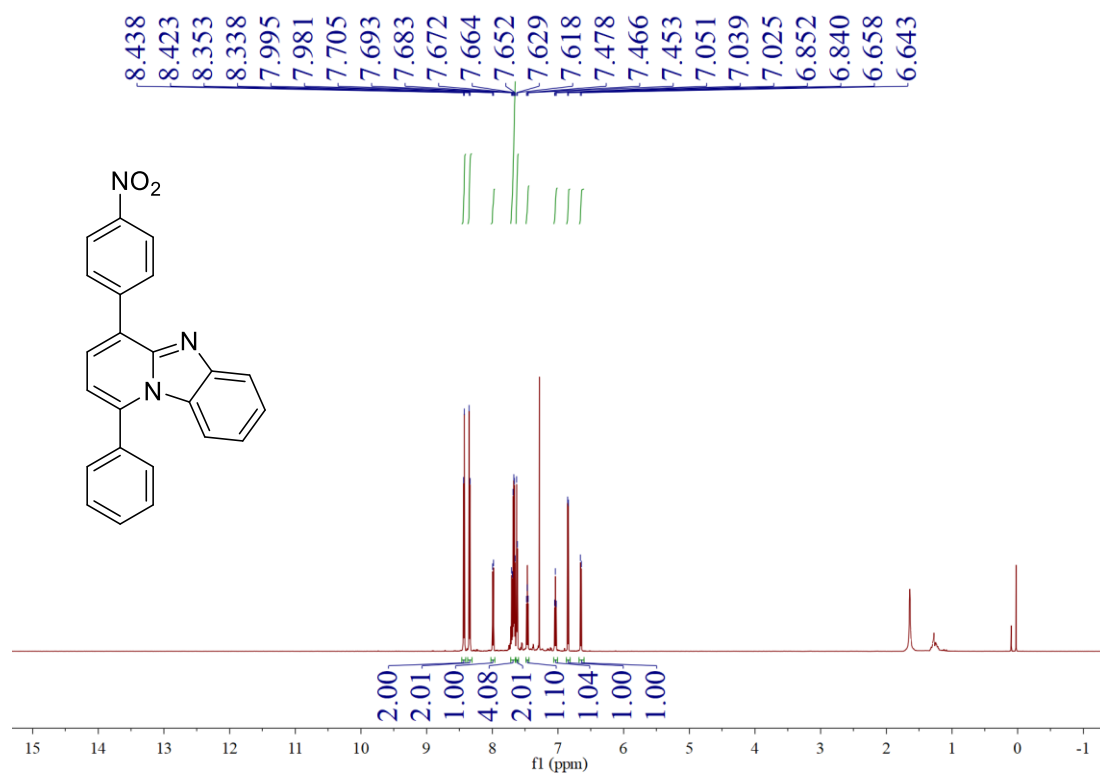

<sup>1</sup>H NMR spectrum of compound **3j**

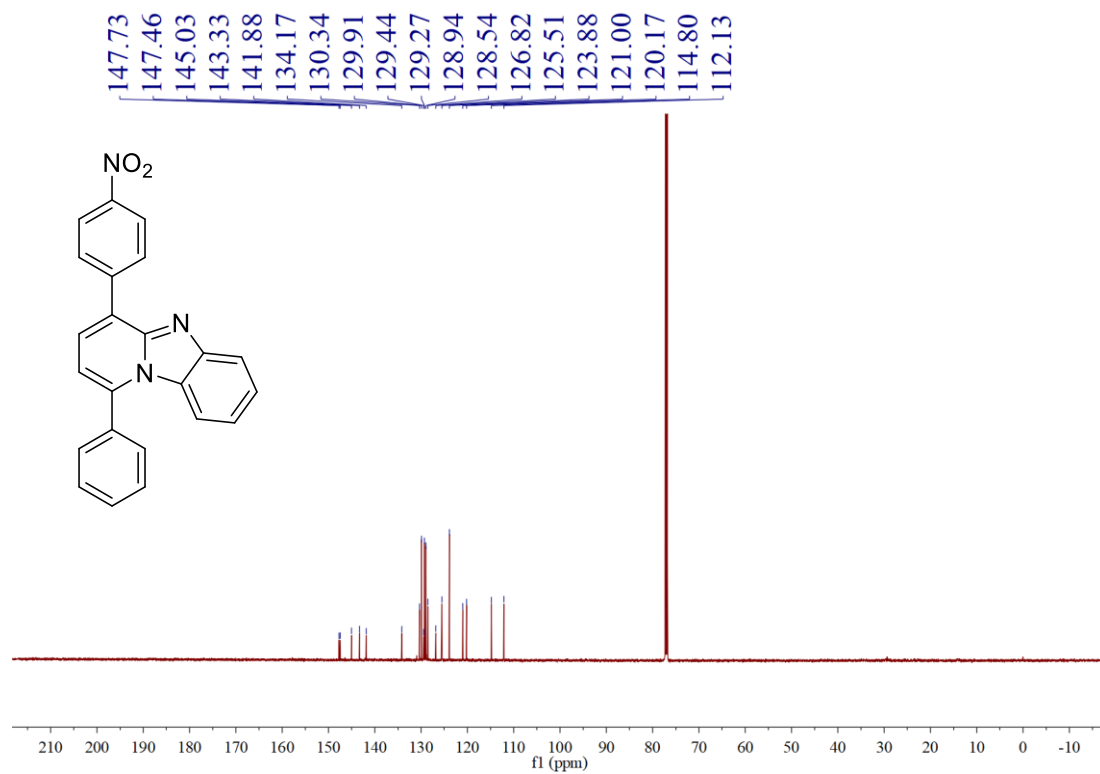

<sup>13</sup>C NMR spectrum of compound **3j**



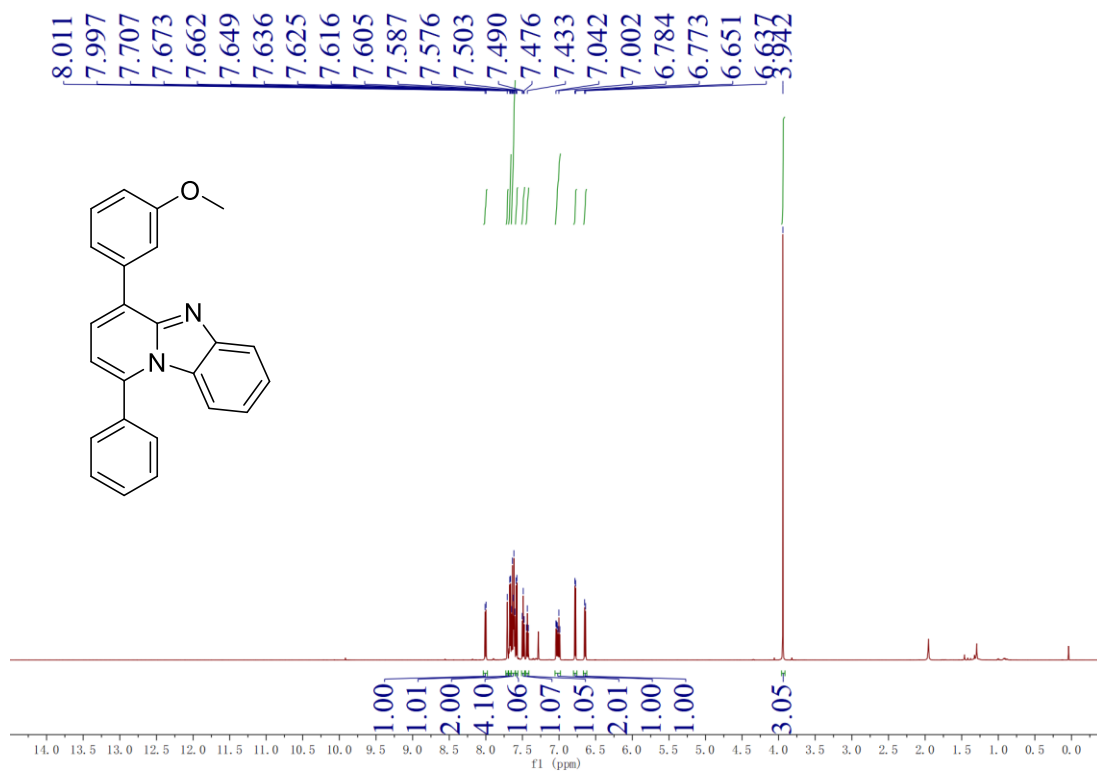

**<sup>1</sup>H NMR spectrum of compound **3k****

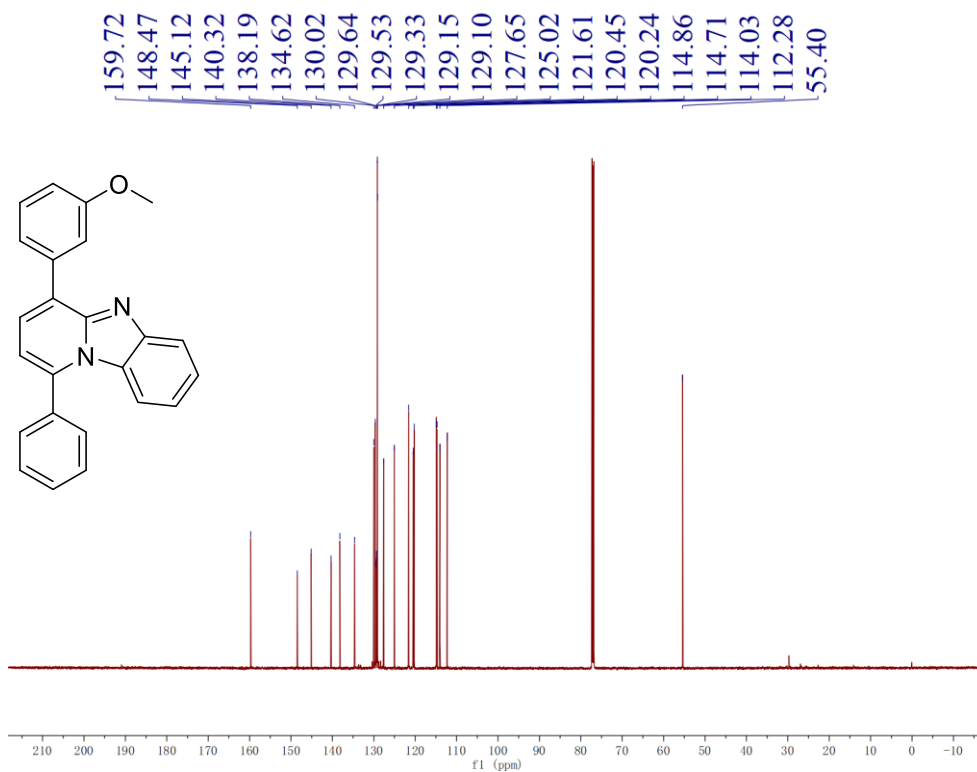

**<sup>13</sup>C NMR spectrum of compound **3k****

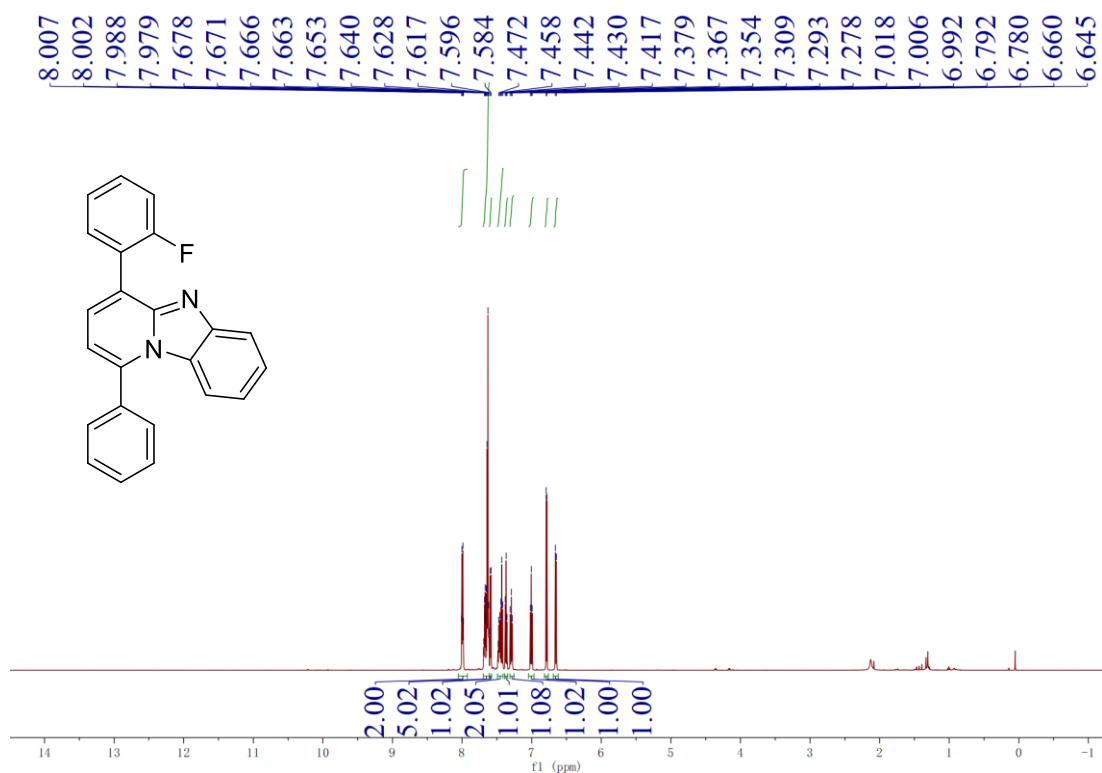

<sup>1</sup>H NMR spectrum of compound 31

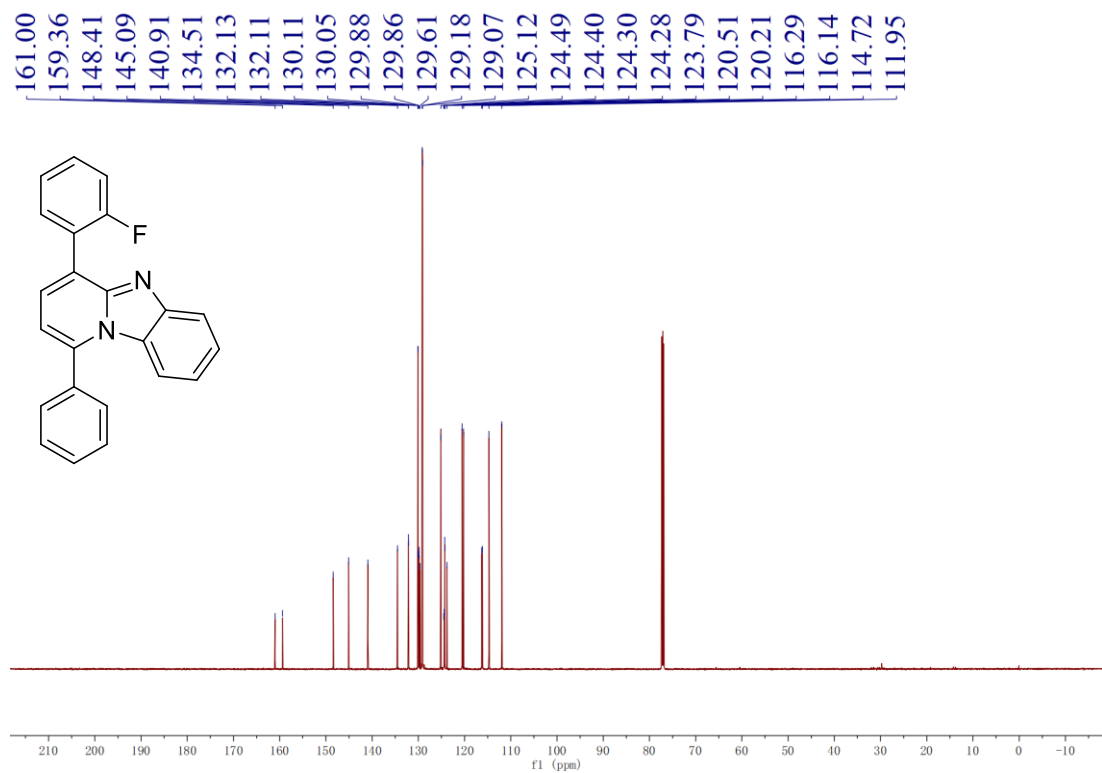

<sup>13</sup>C NMR spectrum of compound 31

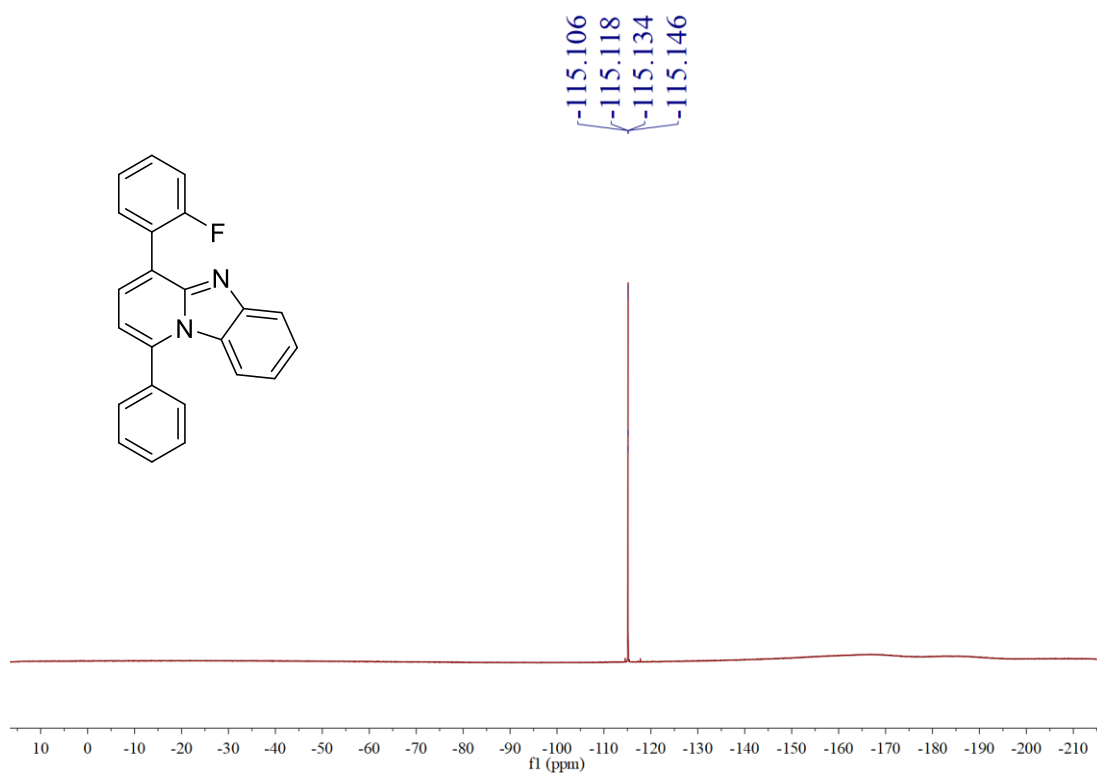

$^{19}\text{F}$  NMR spectrum of compound **3l**

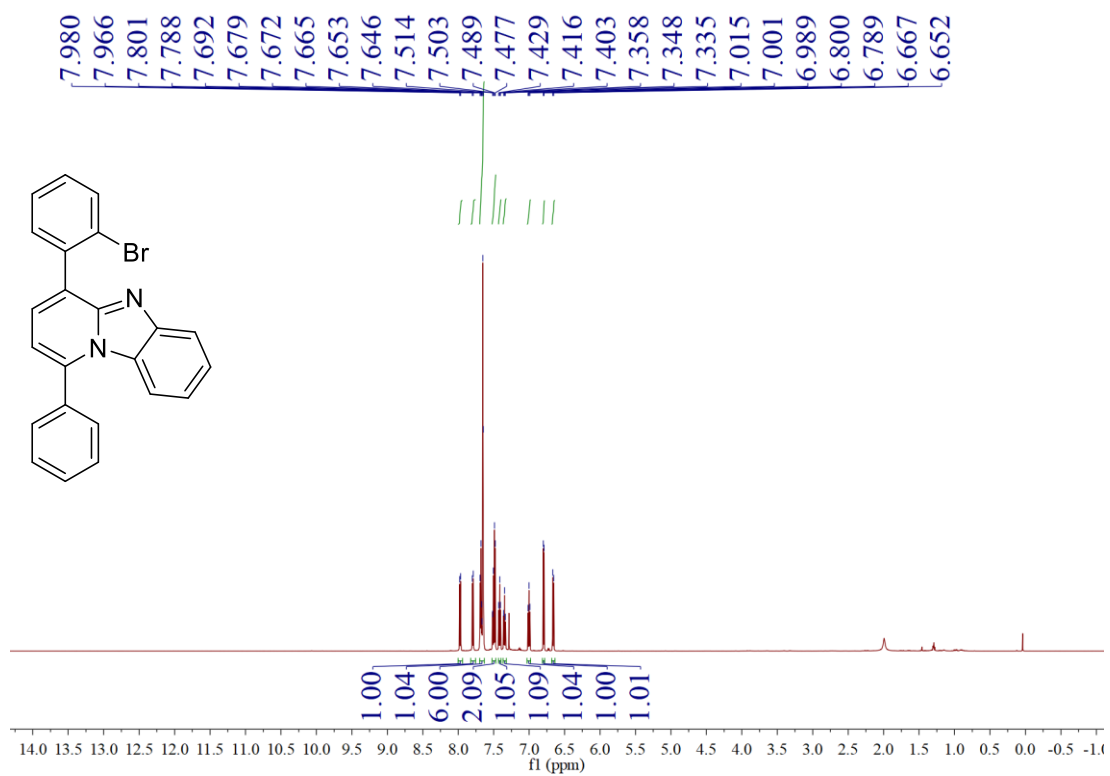

$^1\text{H}$  NMR spectrum of compound **3m**

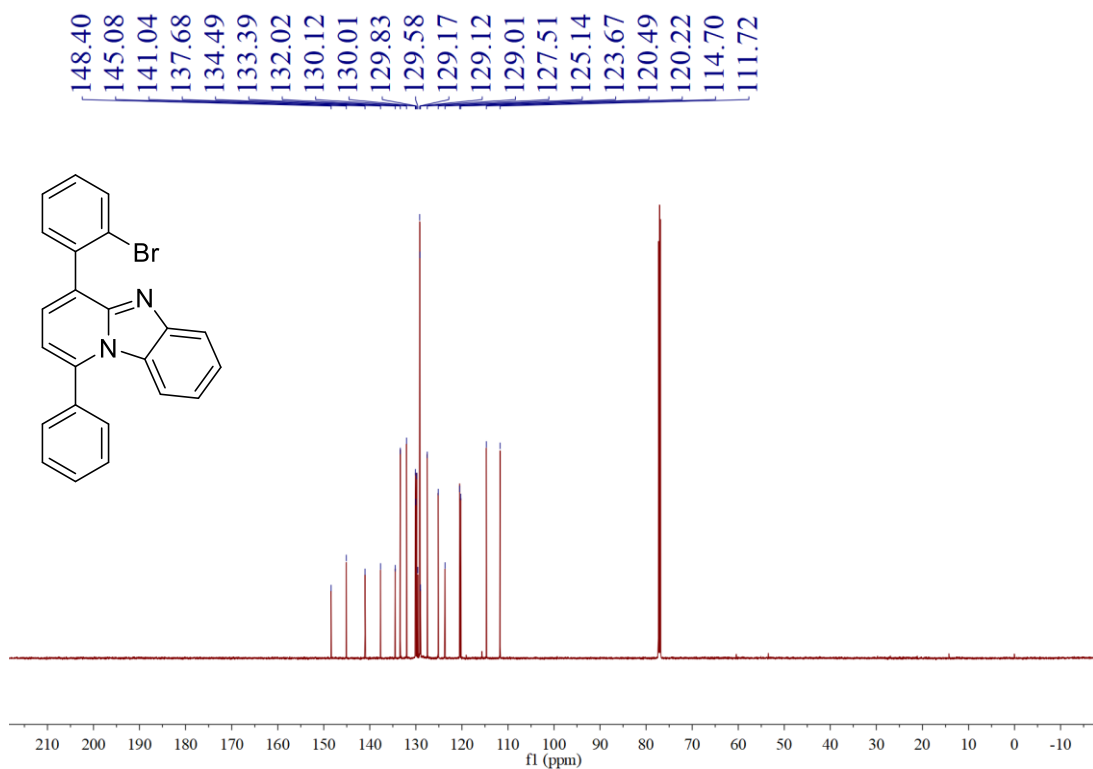

$^{13}\text{C}$  NMR spectrum of compound **3m**

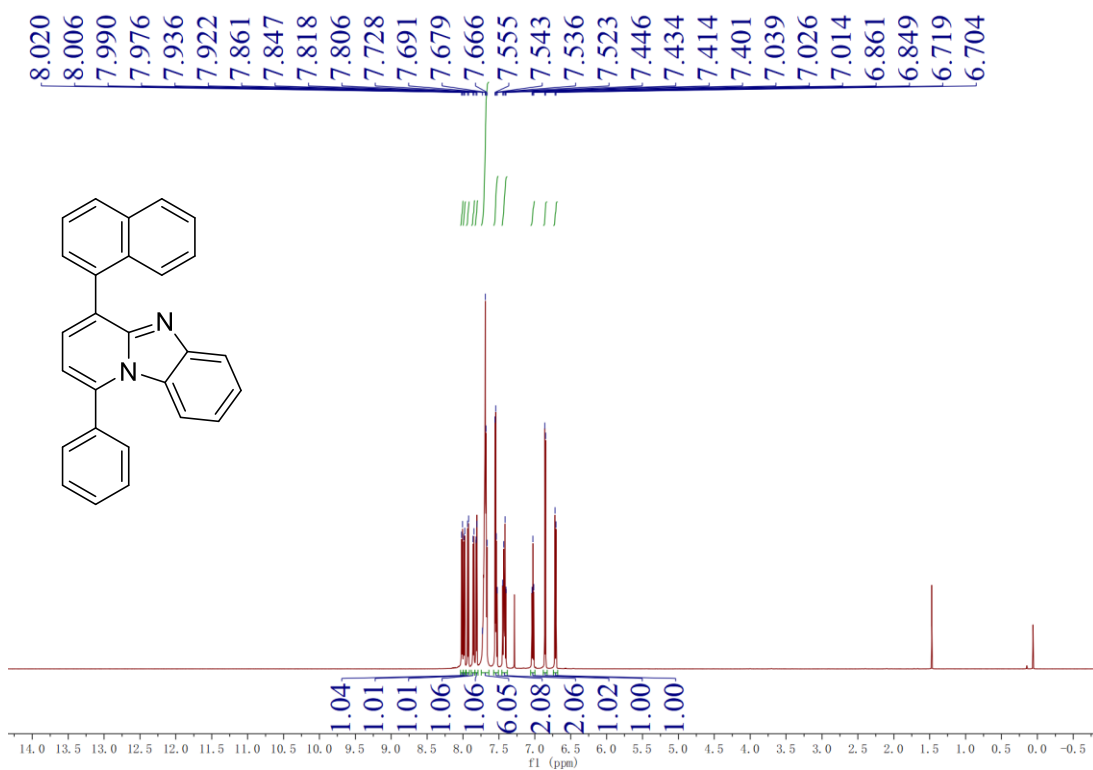

$^1\text{H}$  NMR spectrum of compound **3n**

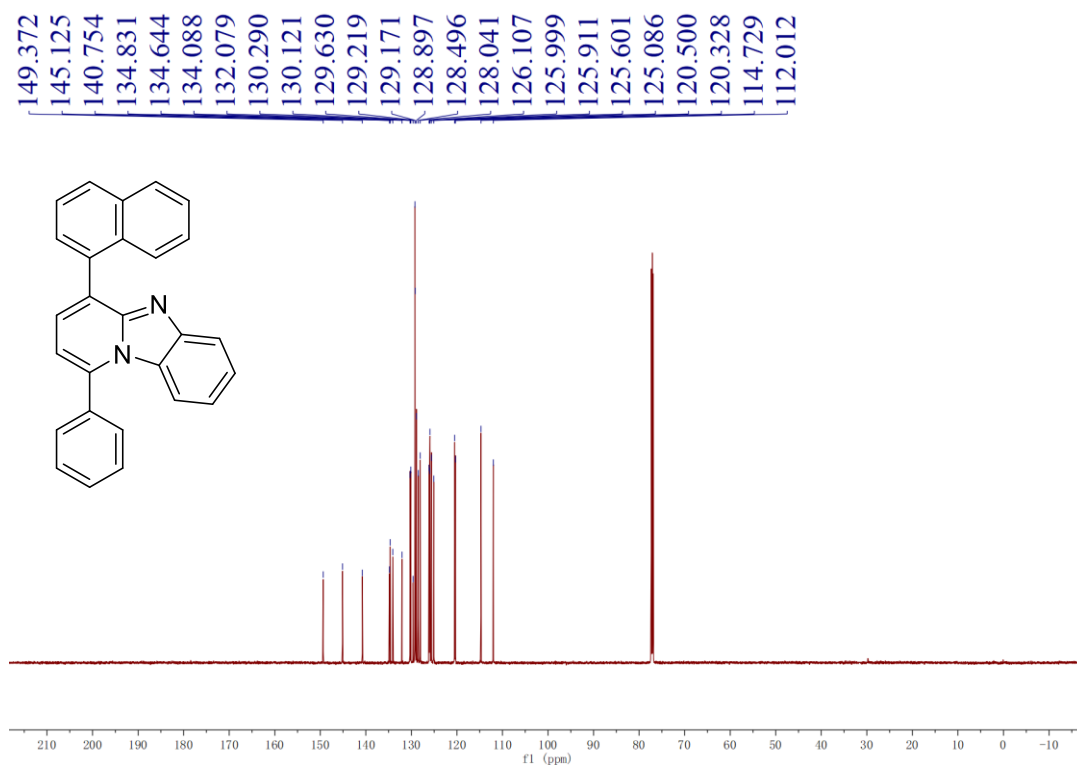

<sup>13</sup>C NMR spectrum of compound **3n**

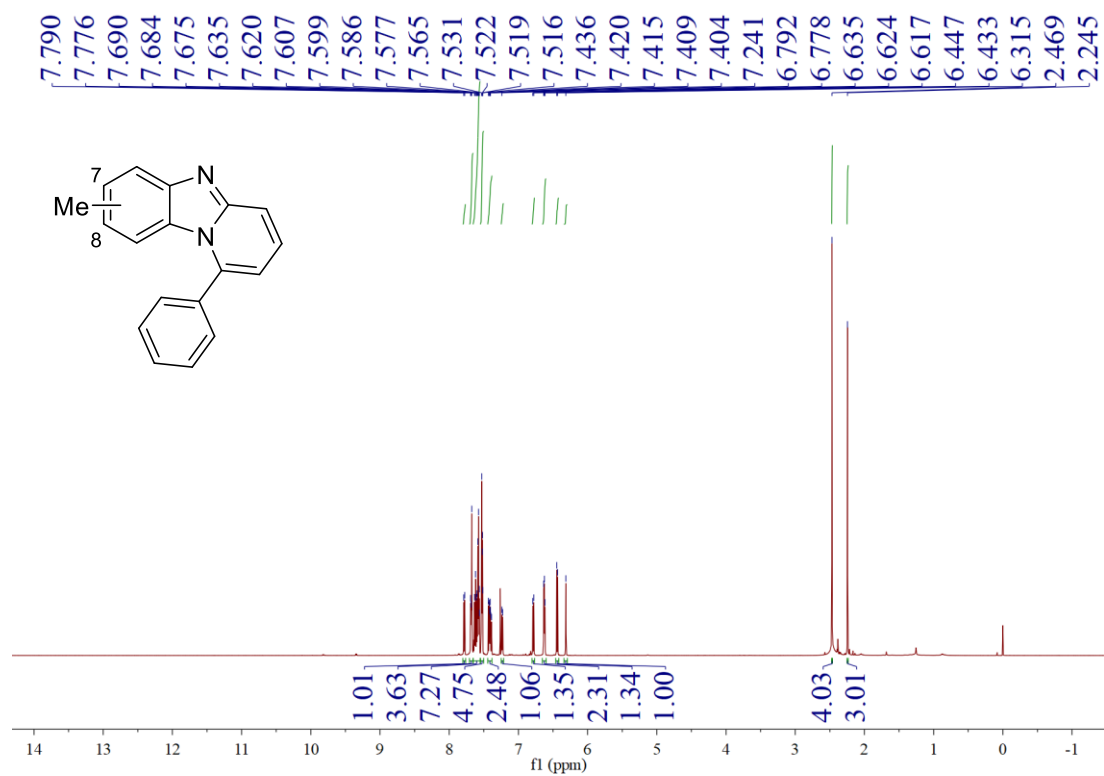

<sup>1</sup>H NMR spectrum of compound **4a/4a'**

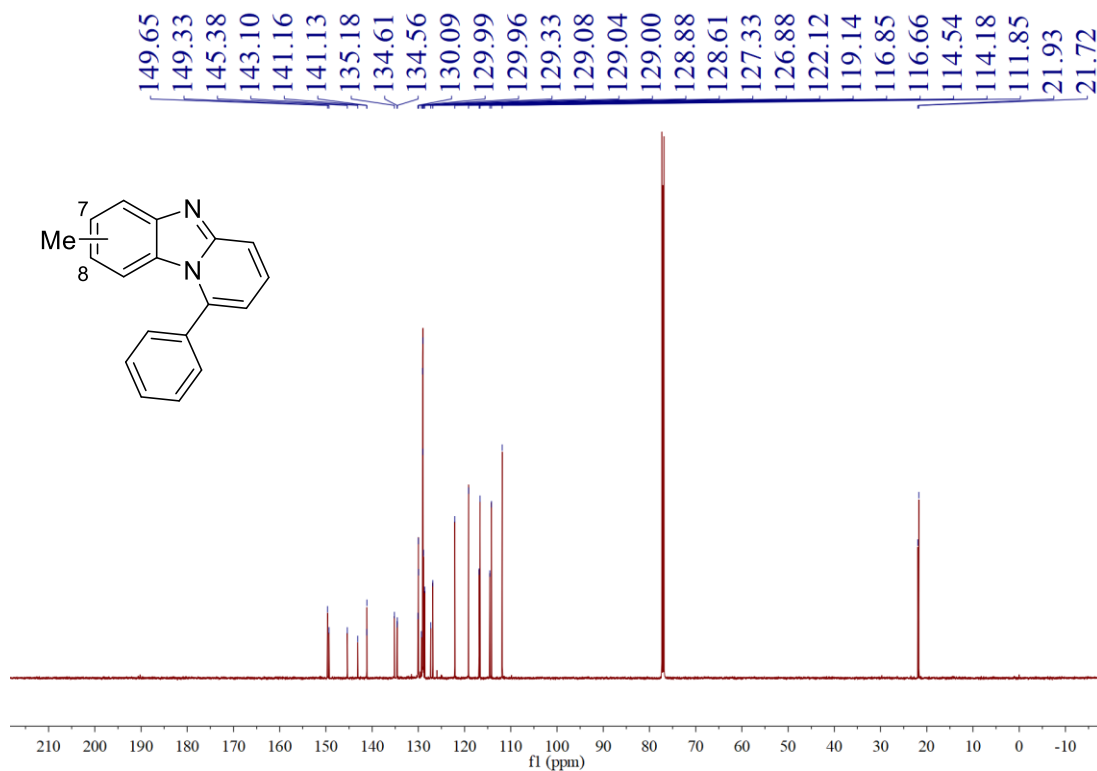

<sup>13</sup>C NMR spectrum of compound **4a/4a'**

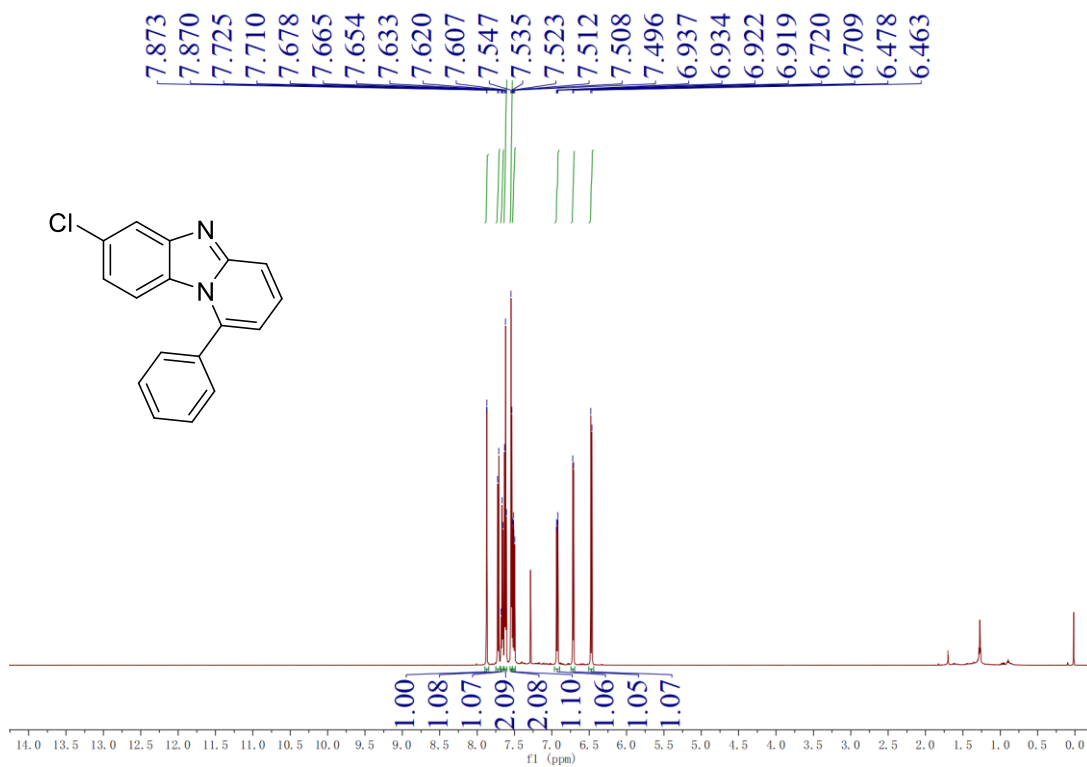

<sup>1</sup>H NMR spectrum of compound **4b**

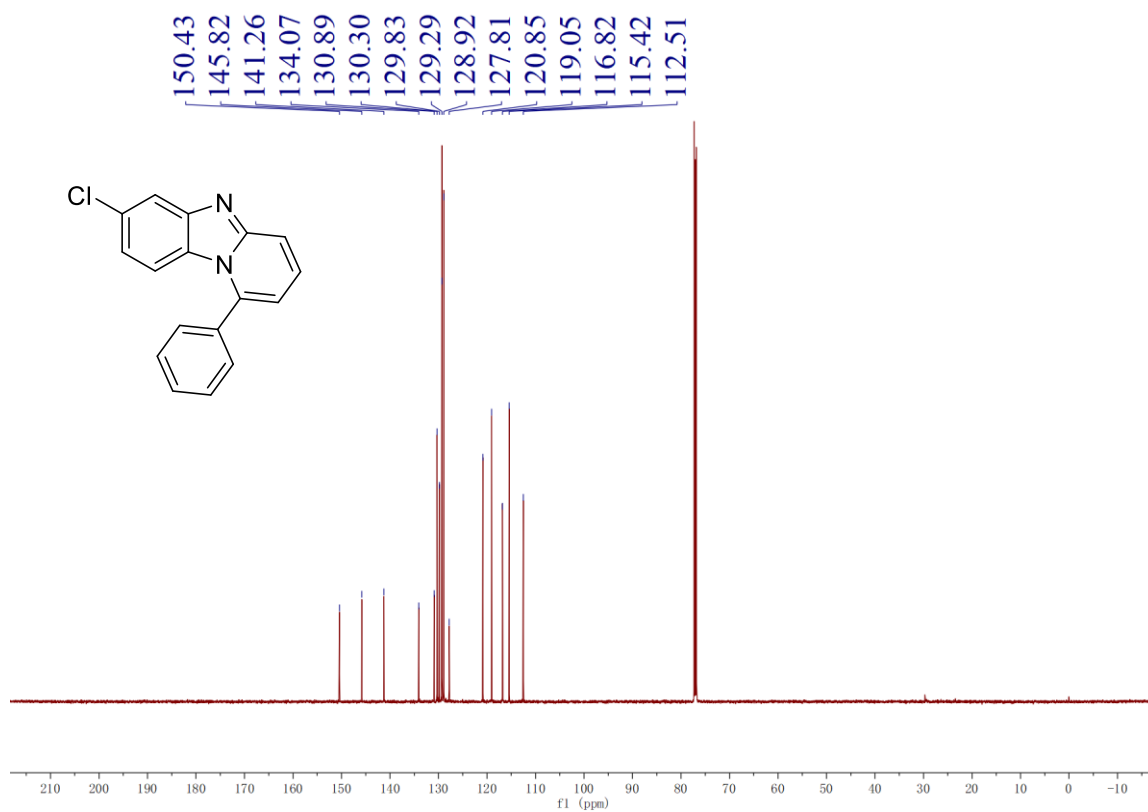

<sup>13</sup>C NMR spectrum of compound **4b**

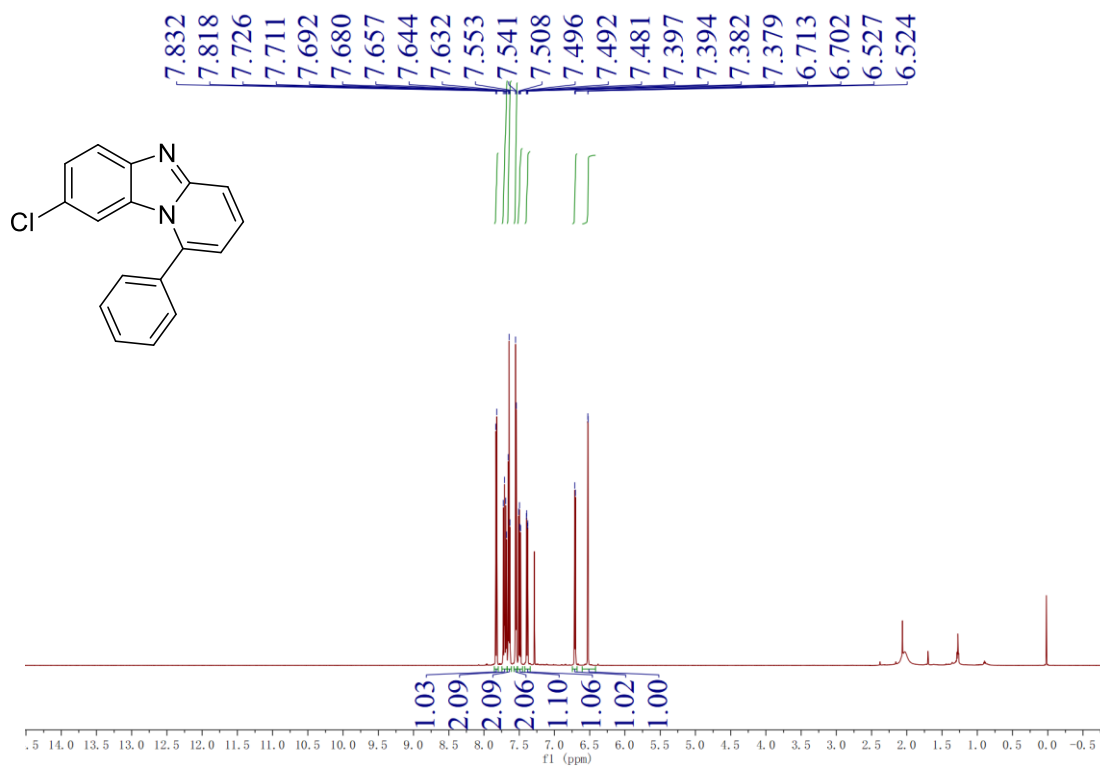

<sup>1</sup>H NMR spectrum of compound **4b'**

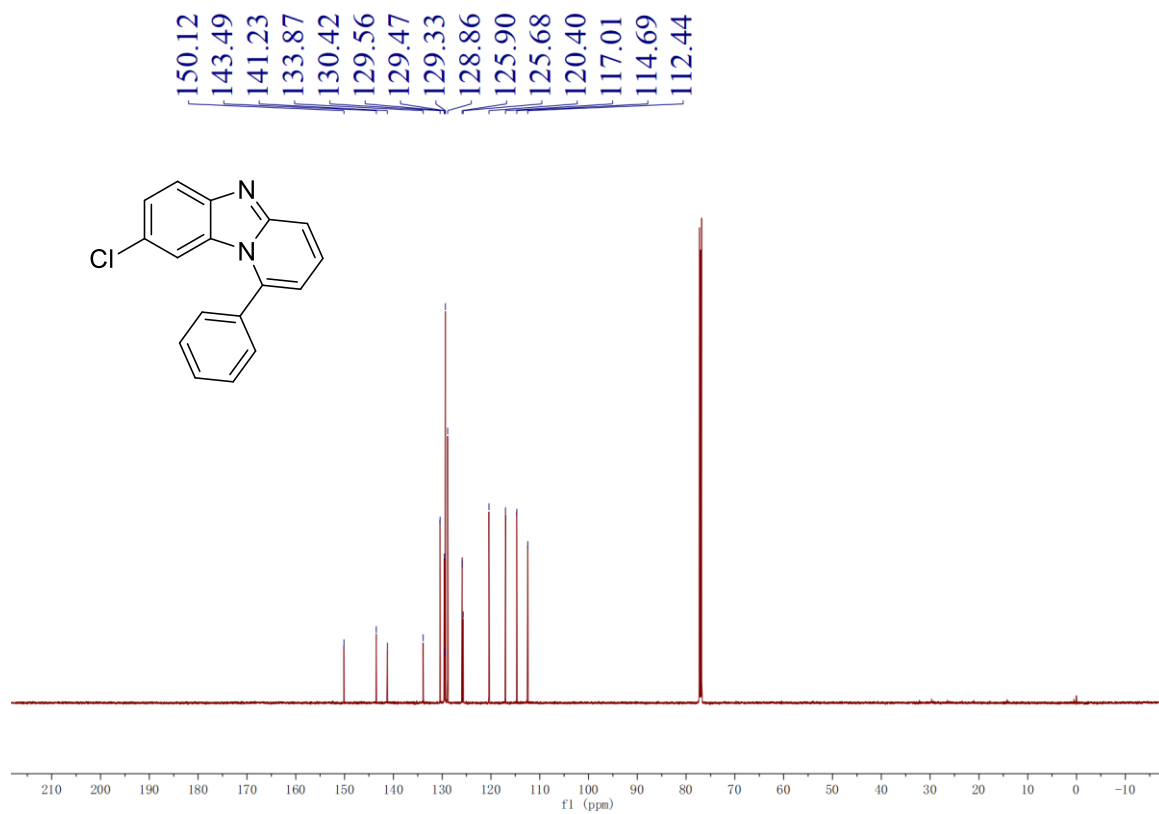

$^{13}\text{C}$  NMR spectrum of compound **4b'**

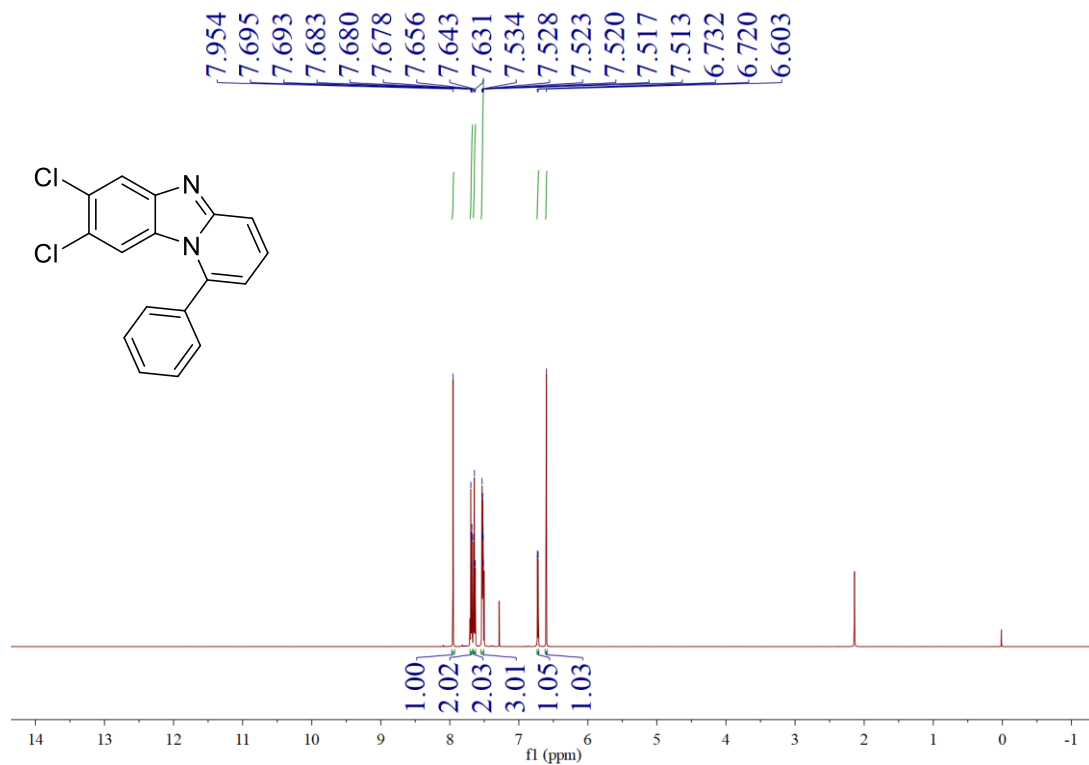

$^1\text{H}$  NMR spectrum of compound **4c**



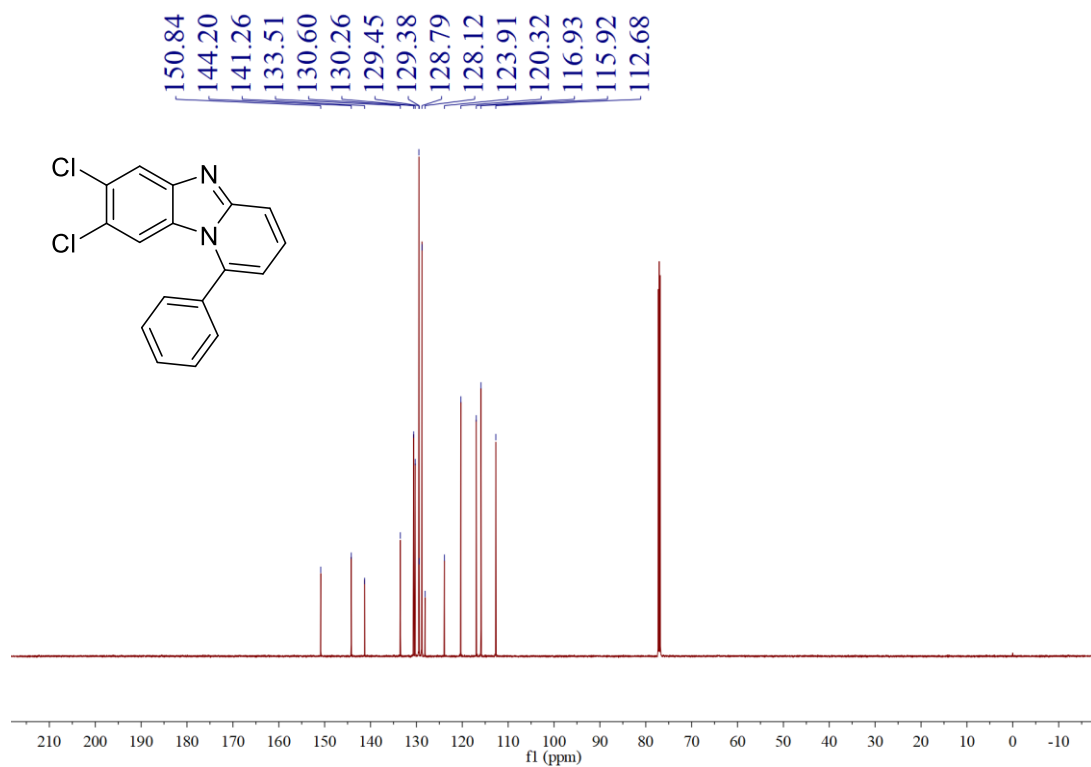

$^{13}\text{C}$  NMR spectrum of compound **4c**

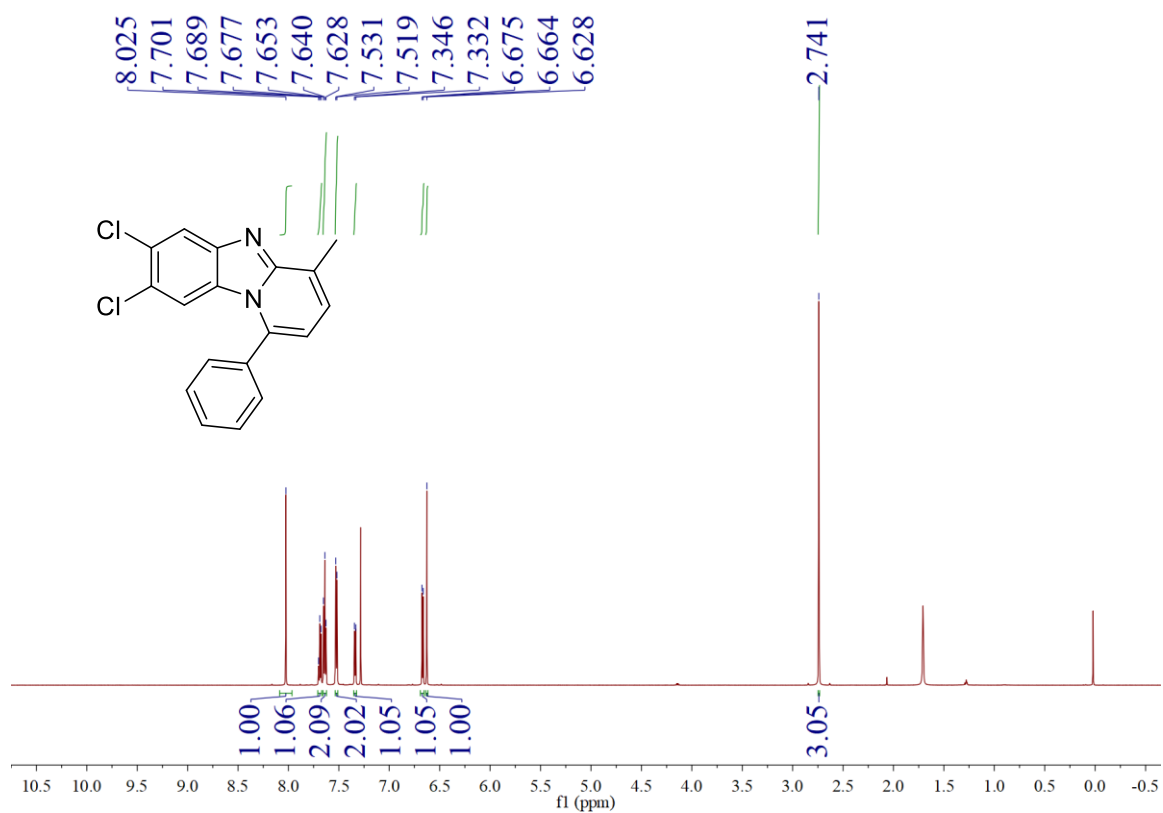

$^1\text{H}$  NMR spectrum of compound **4d**

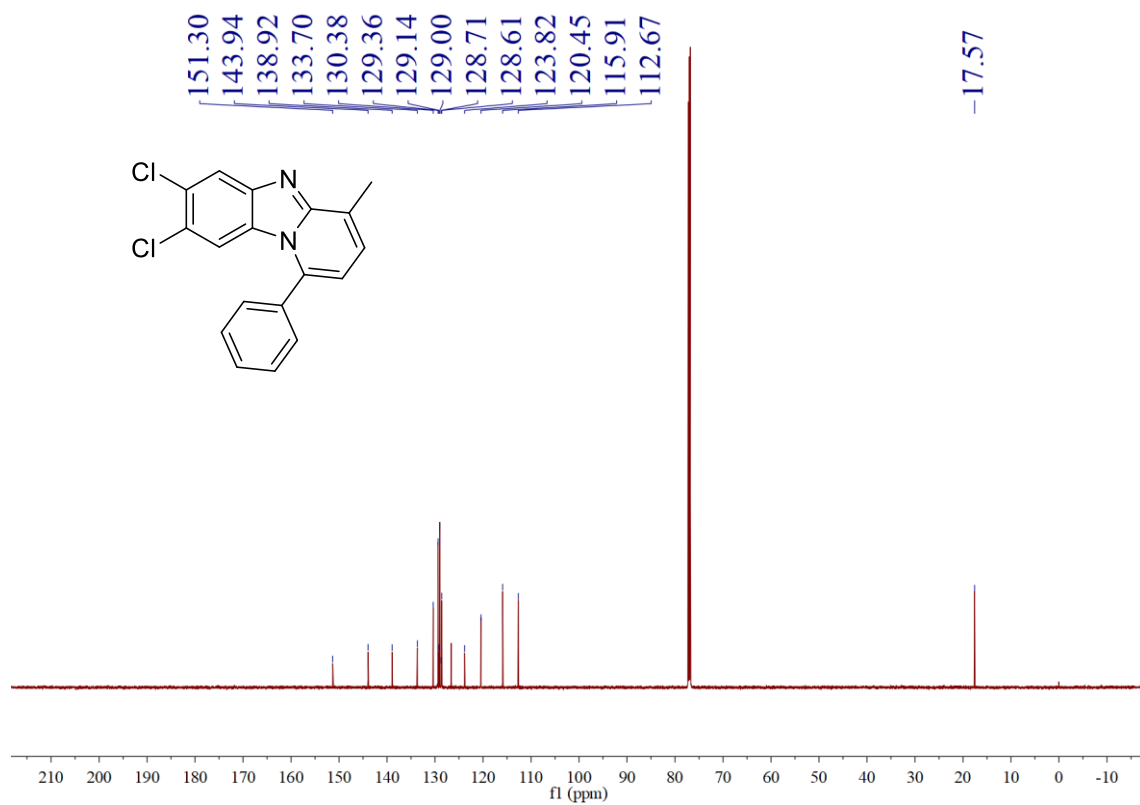

$^{13}\text{C}$  NMR spectrum of compound **4d**

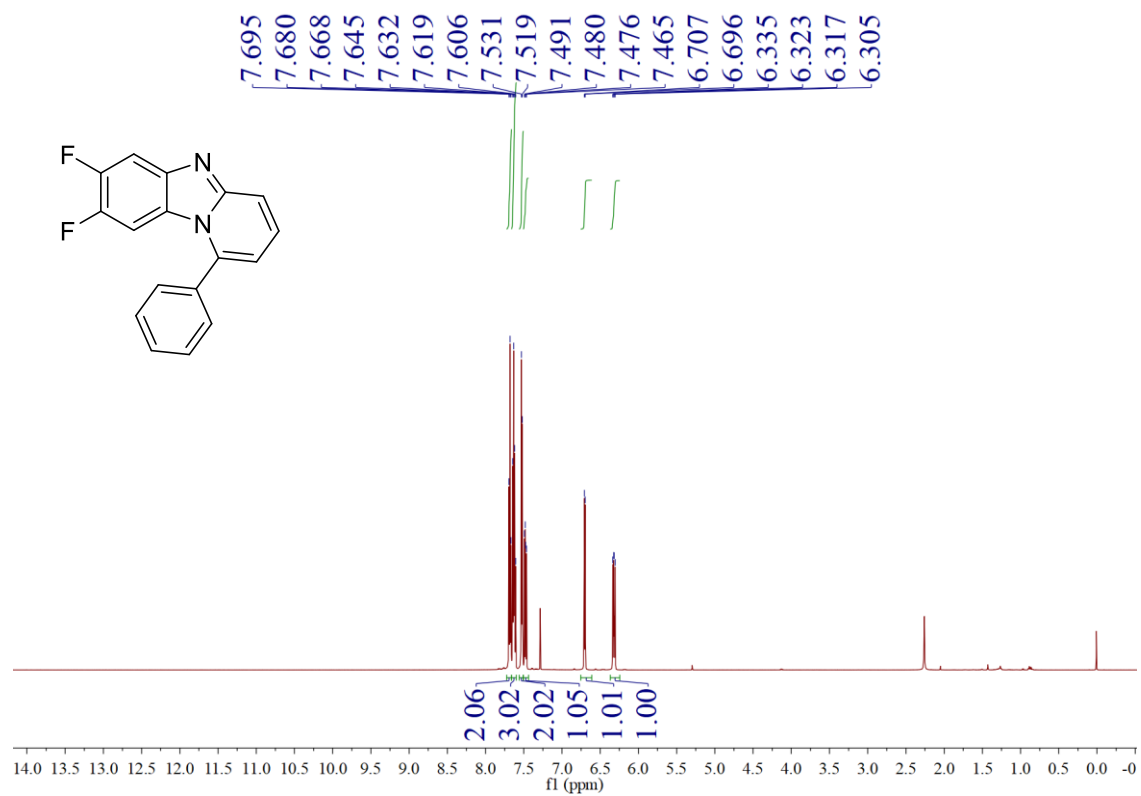

$^1\text{H}$  NMR spectrum of compound **4e**

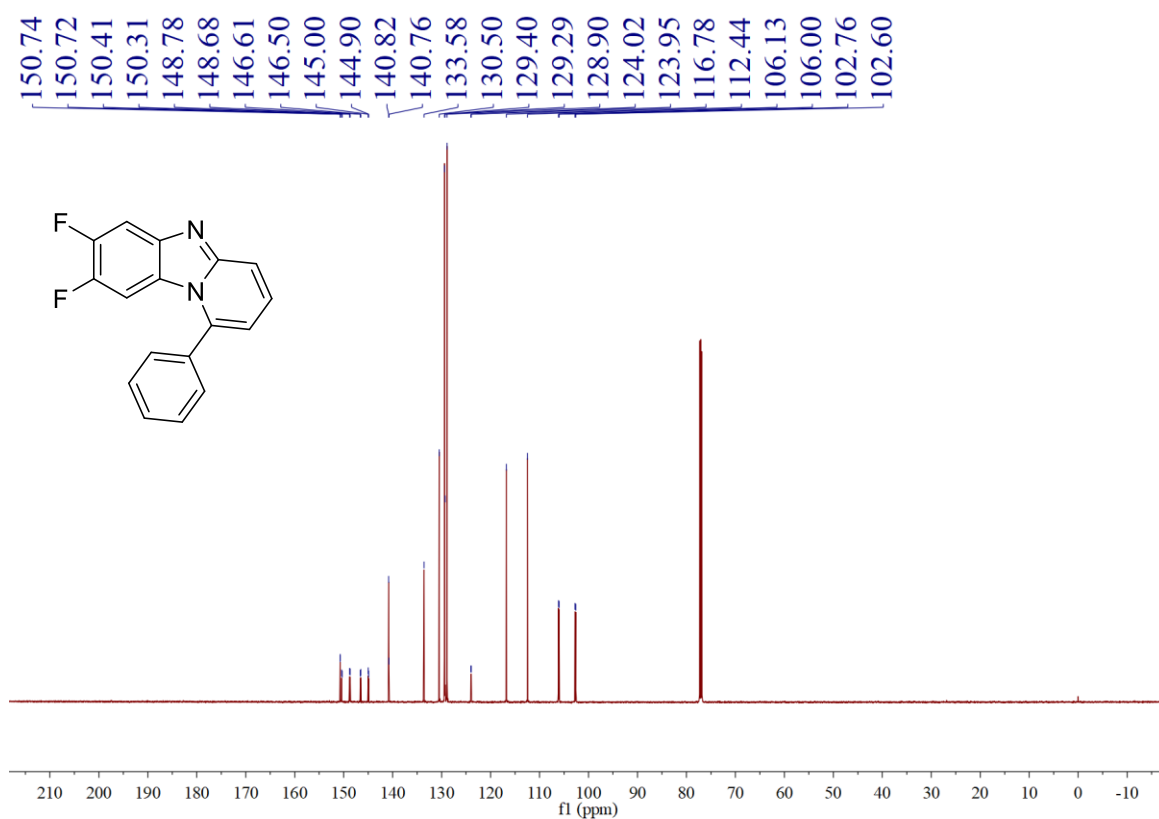

<sup>13</sup>C NMR spectrum of compound 4e

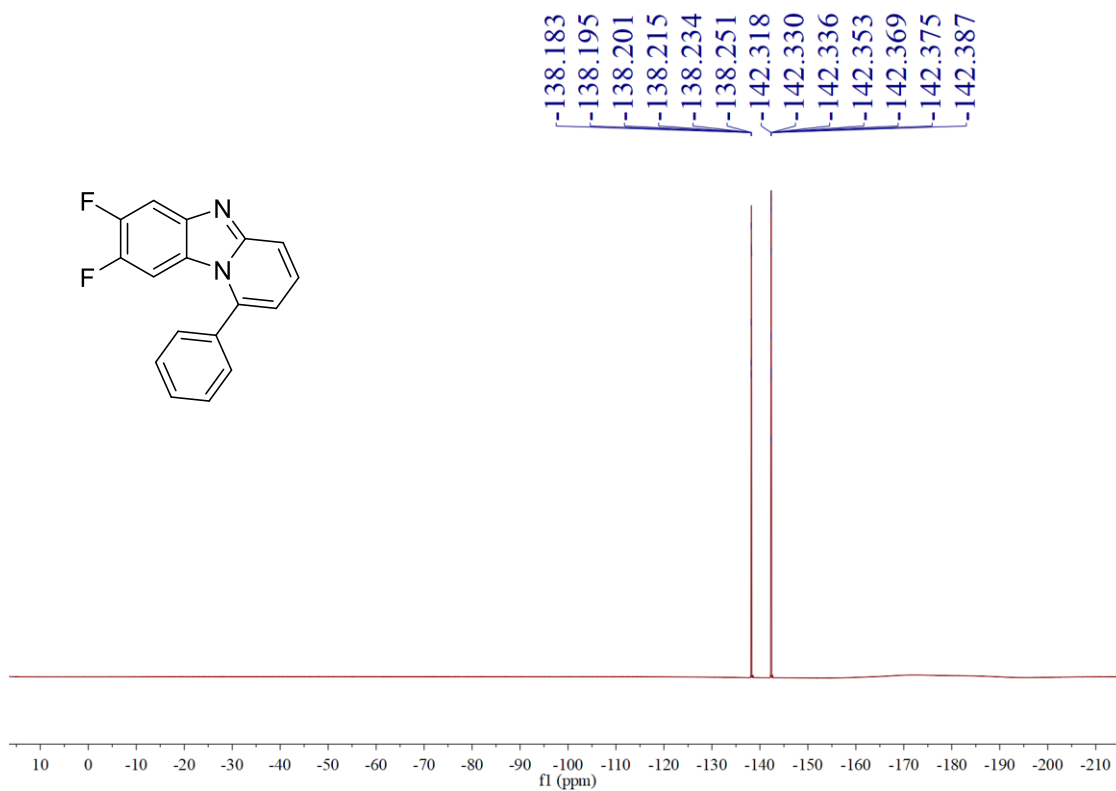

<sup>19</sup>F NMR spectrum of compound 4e

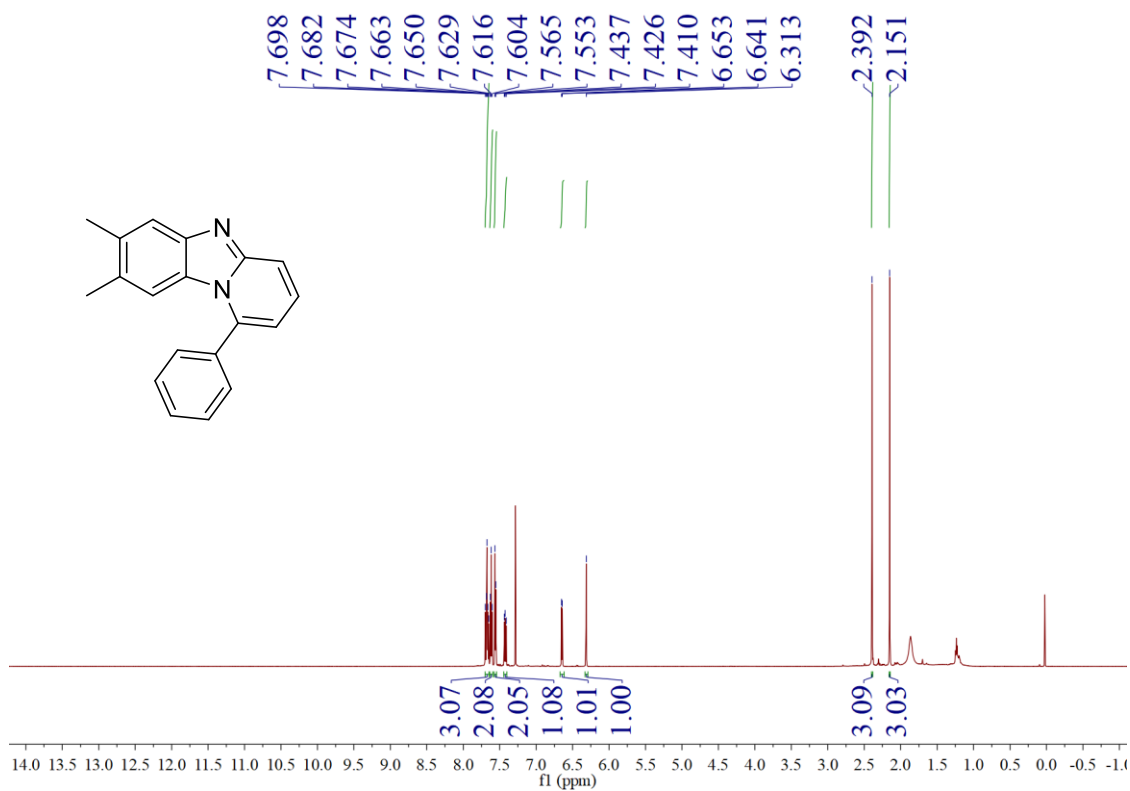

<sup>1</sup>H NMR spectrum of compound 4f

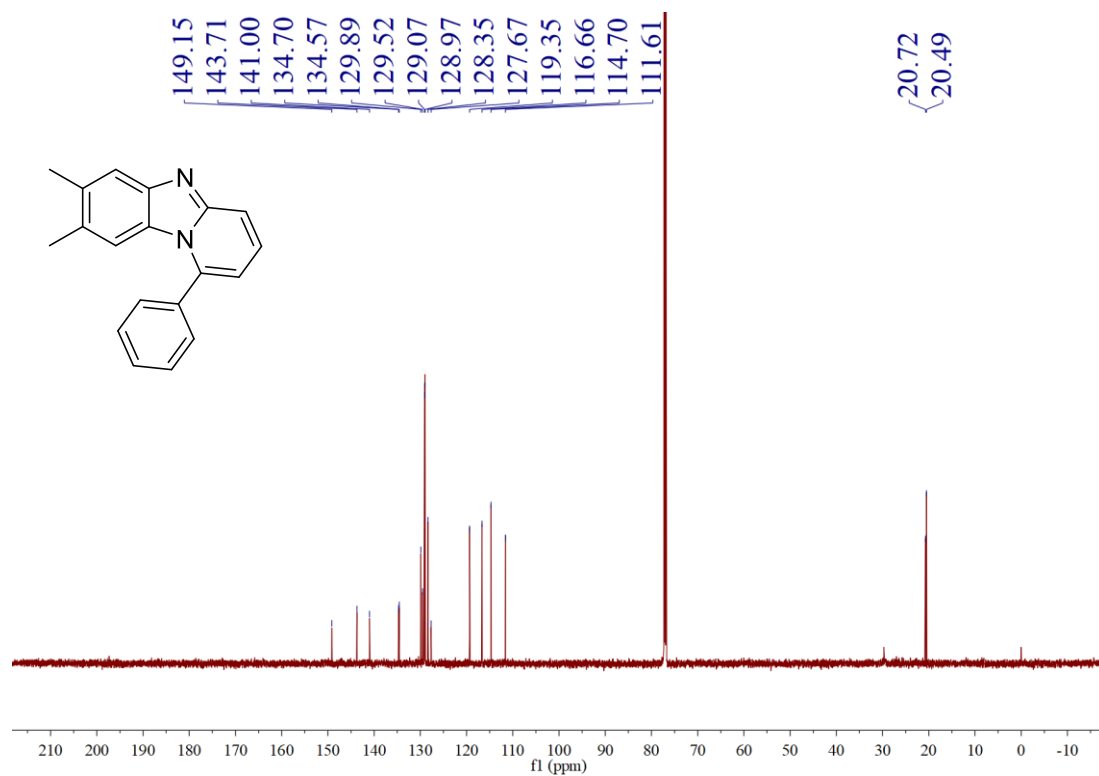

<sup>13</sup>C NMR spectrum of compound 4f

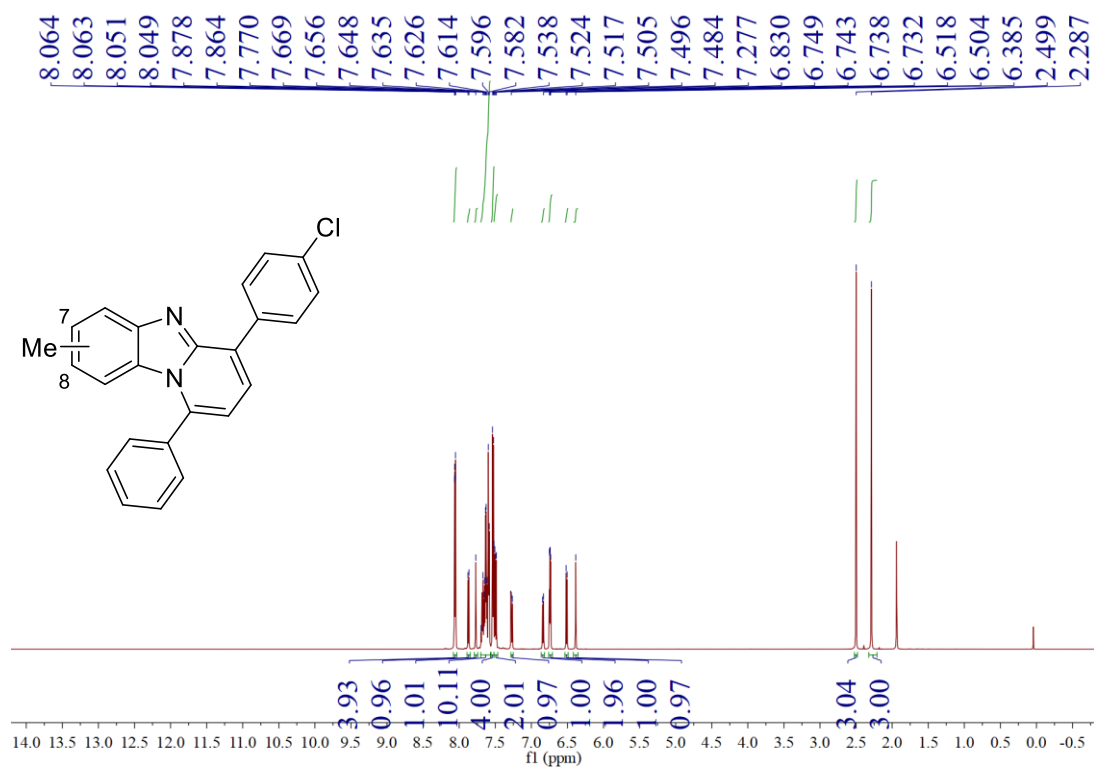

<sup>1</sup>H NMR spectrum of compound **4g/4g'**

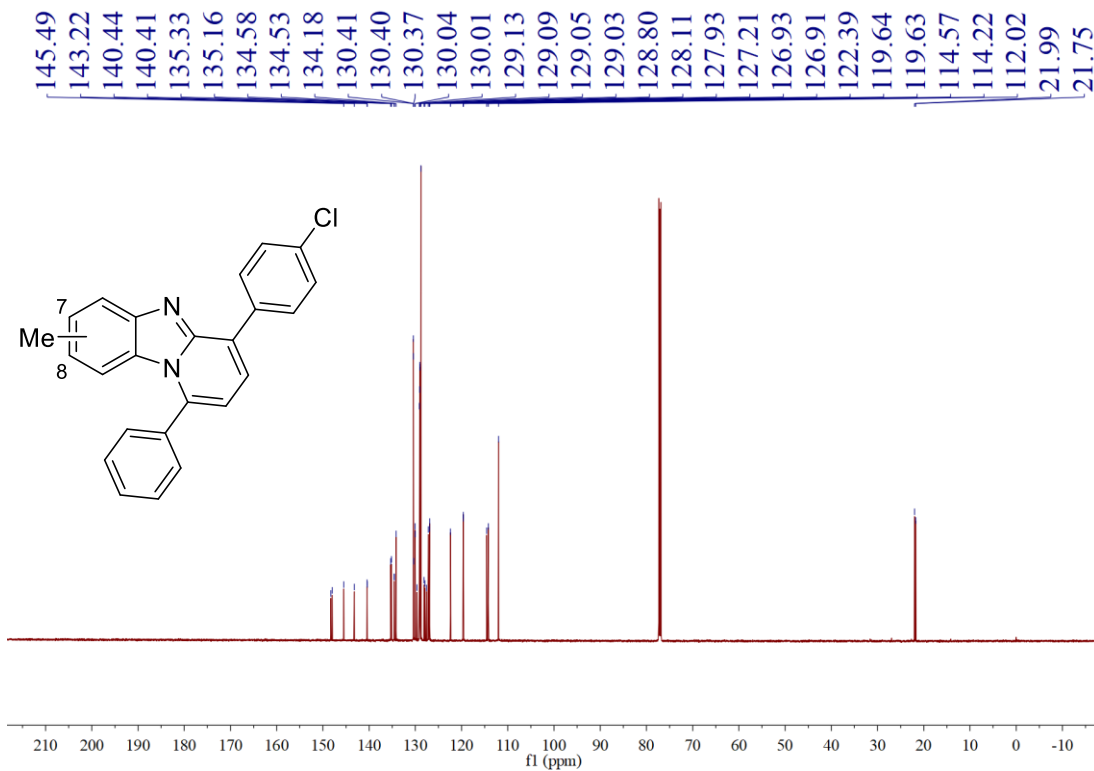

<sup>13</sup>C NMR spectrum of compound **4g/4g'**

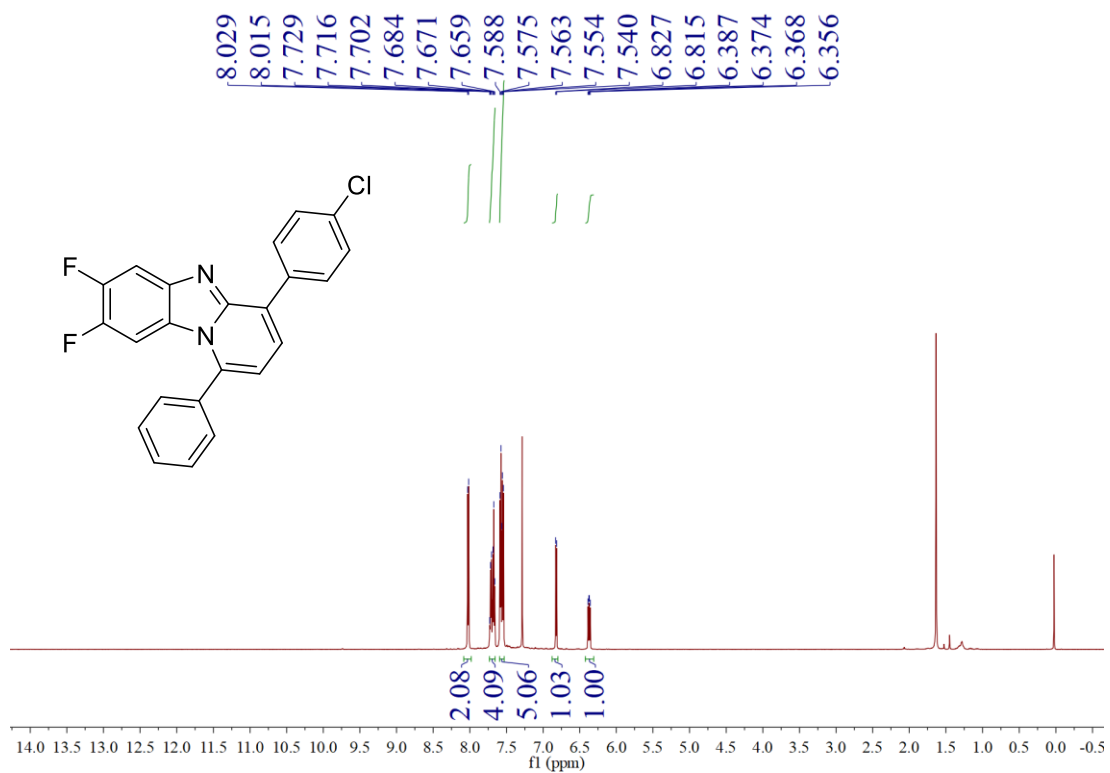

<sup>1</sup>H NMR spectrum of compound **4h**

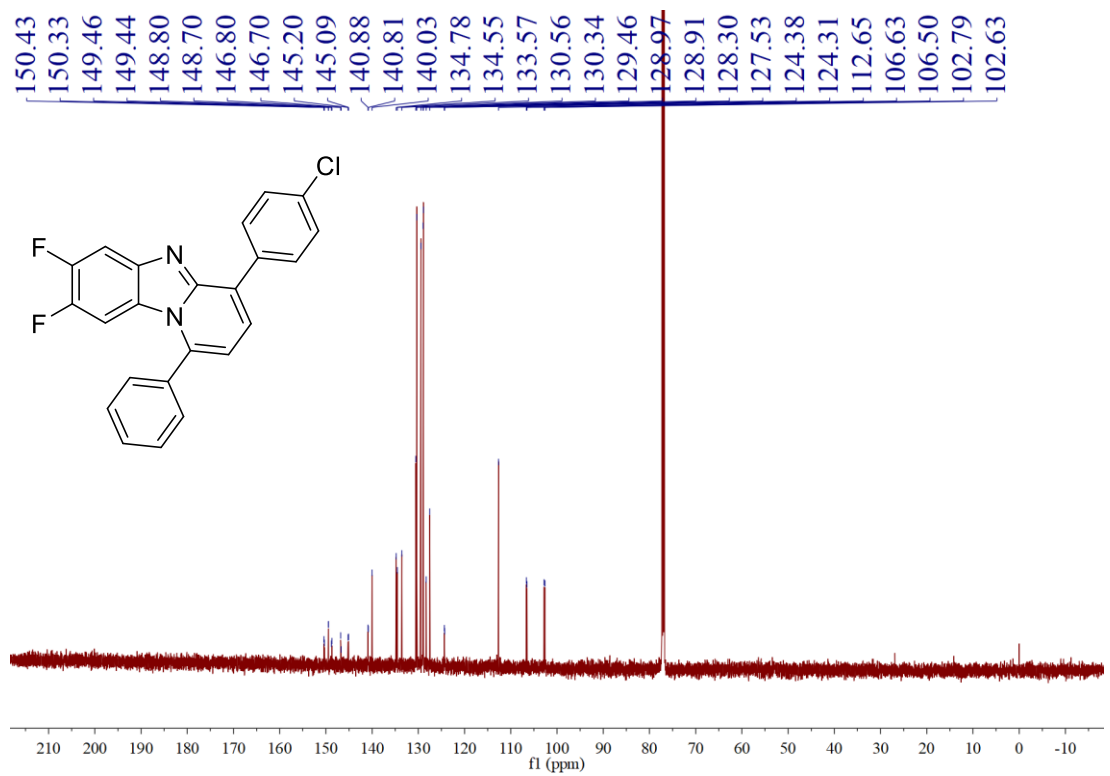

<sup>13</sup>C NMR spectrum of compound **4h**

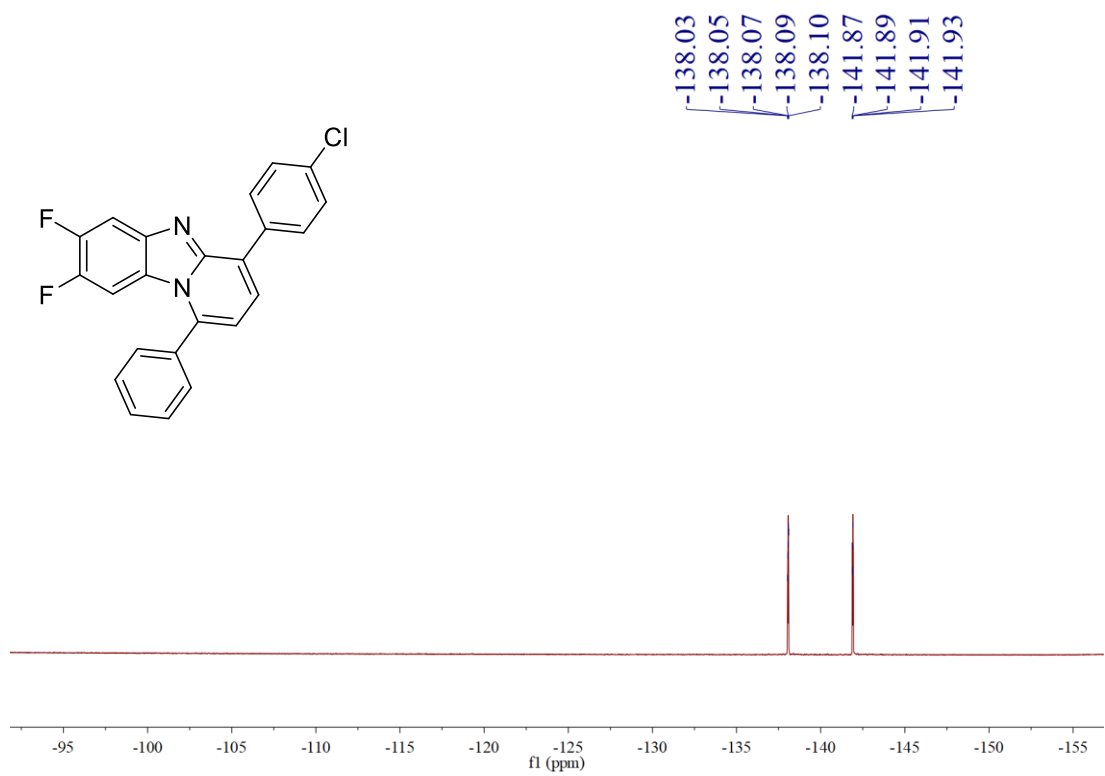

<sup>19</sup>F NMR spectrum of compound **4h**

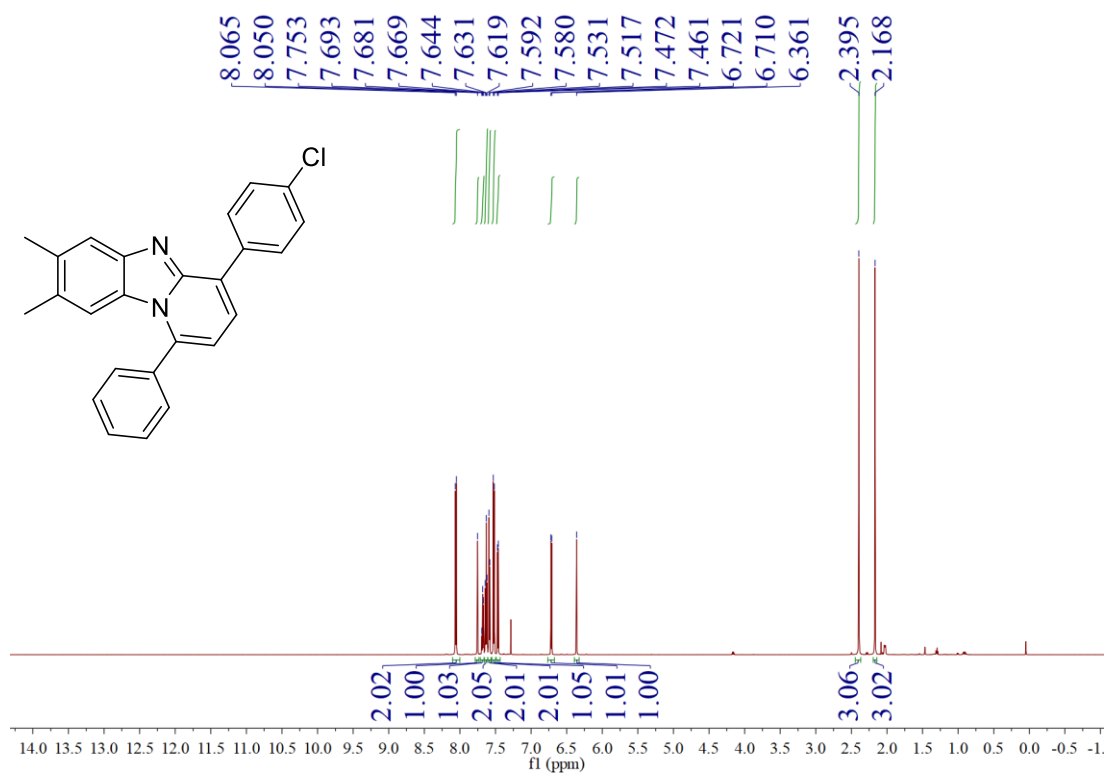

<sup>1</sup>H NMR spectrum of compound **4i**

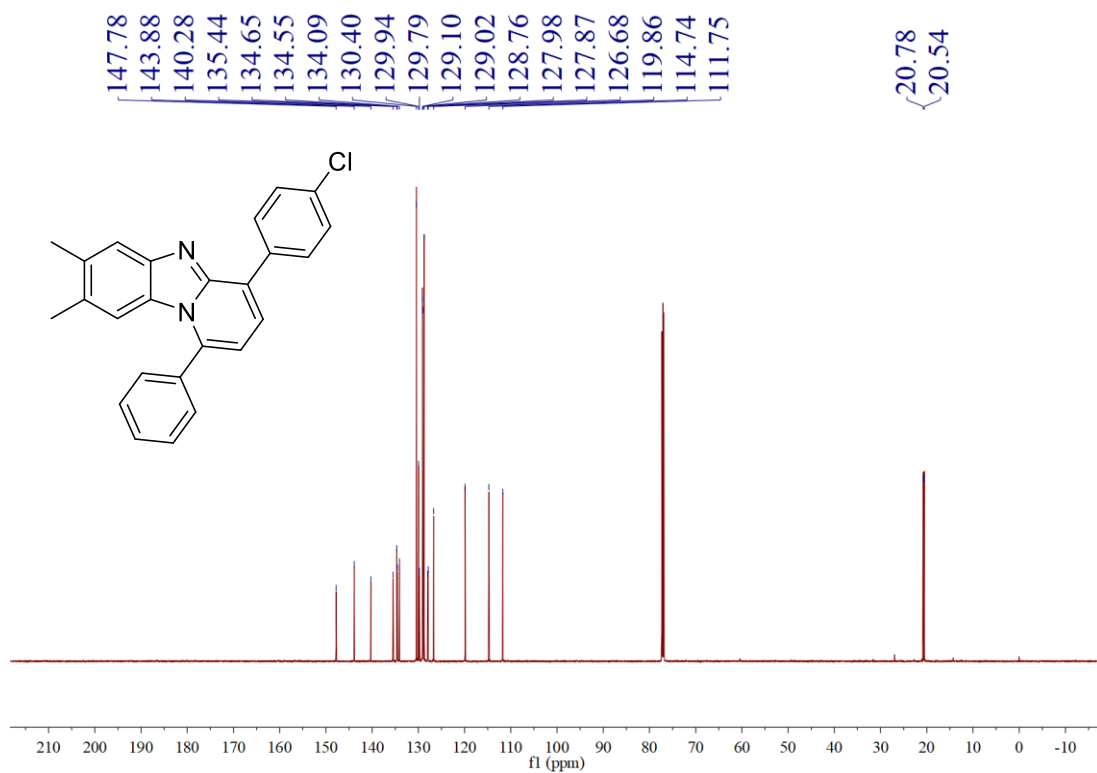

<sup>13</sup>C NMR spectrum of compound **4i**

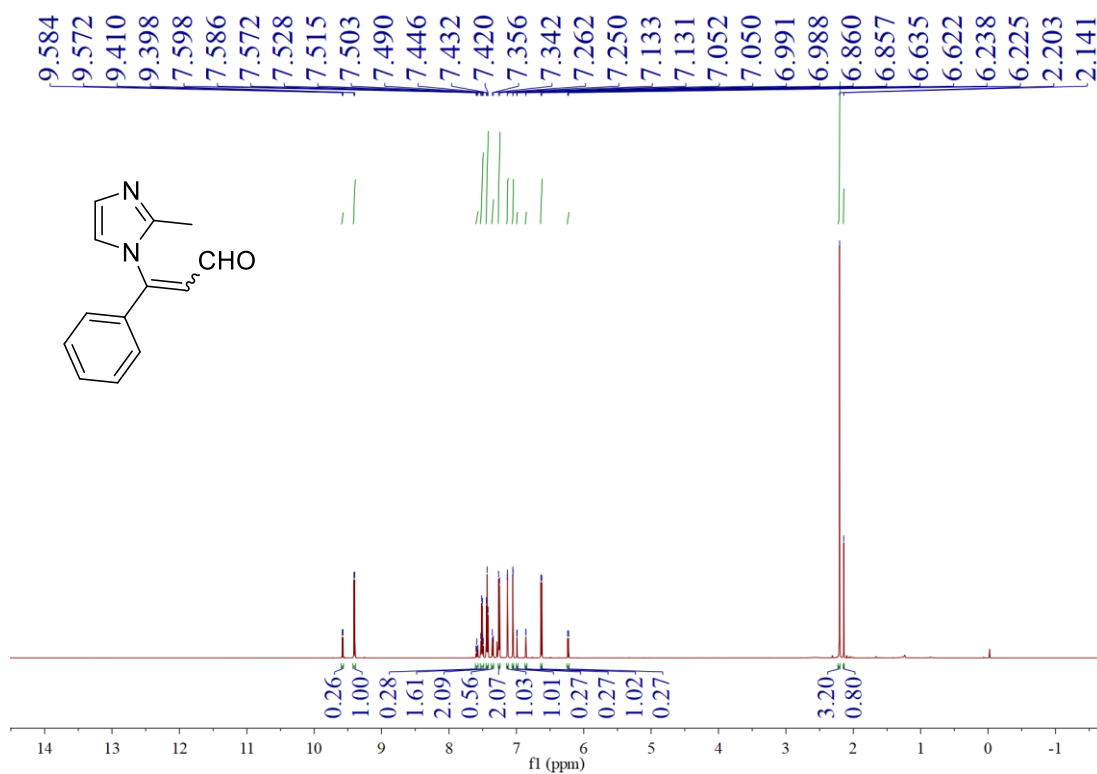

<sup>1</sup>H NMR spectrum of compound **4j**



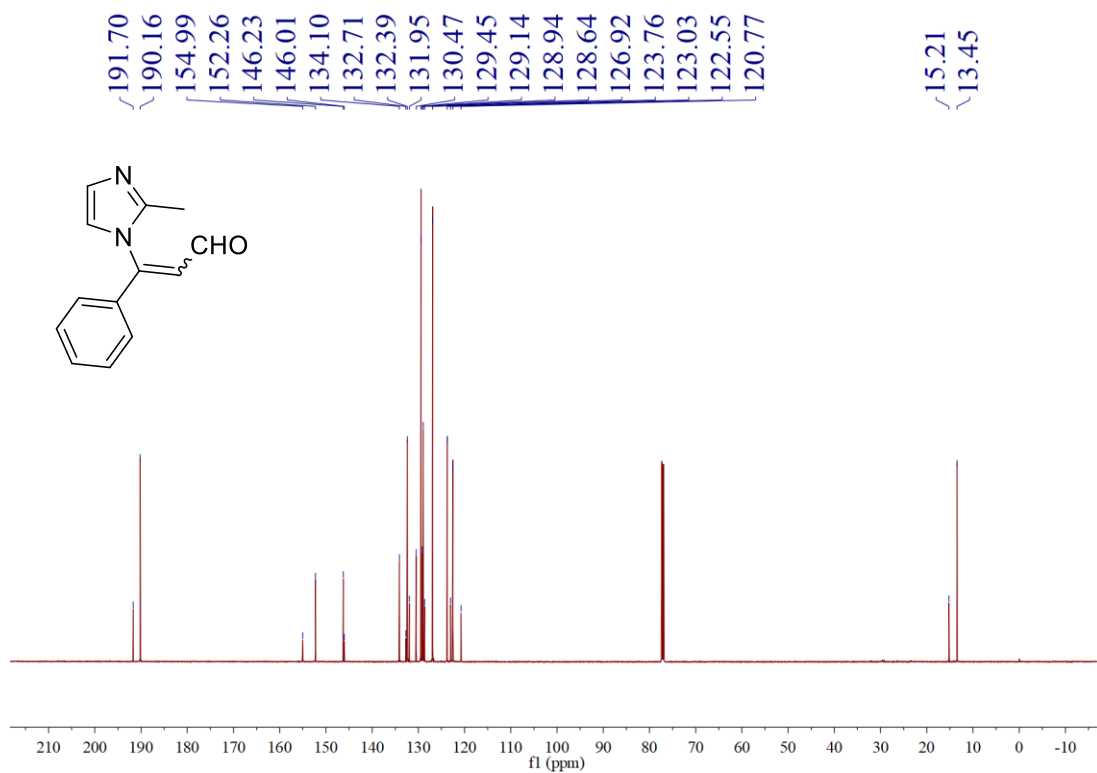

<sup>13</sup>C NMR spectrum of compound **4j**

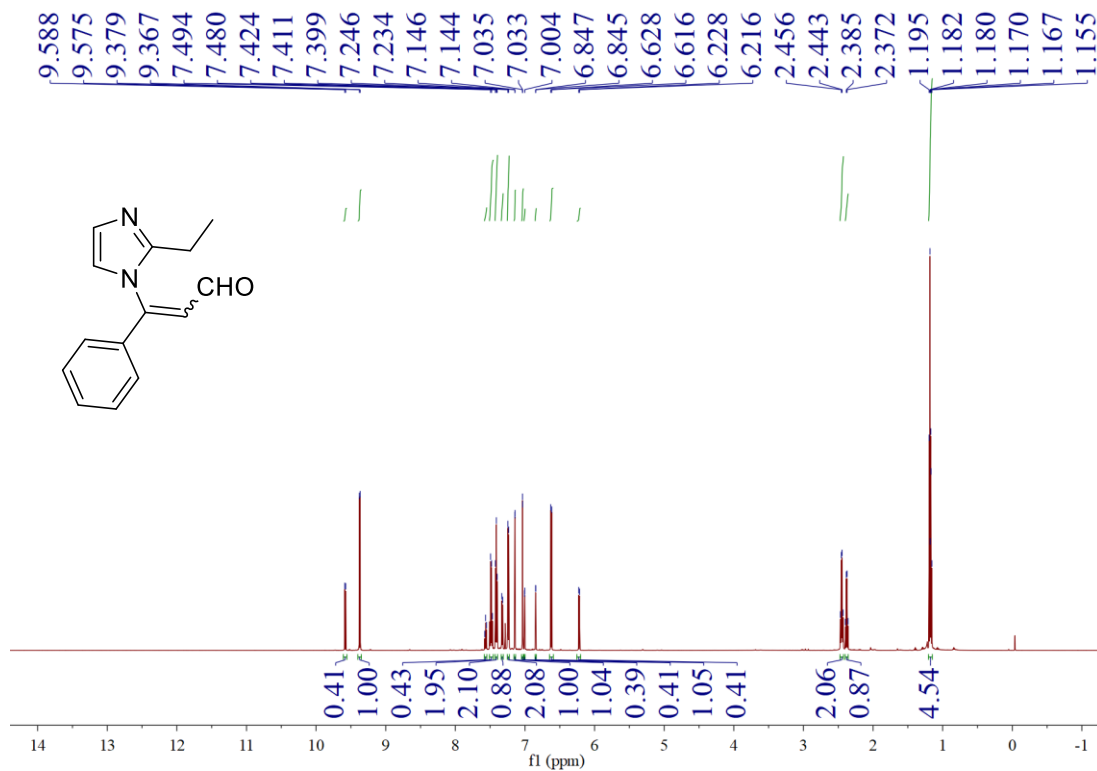

<sup>1</sup>H NMR spectrum of compound **4k**

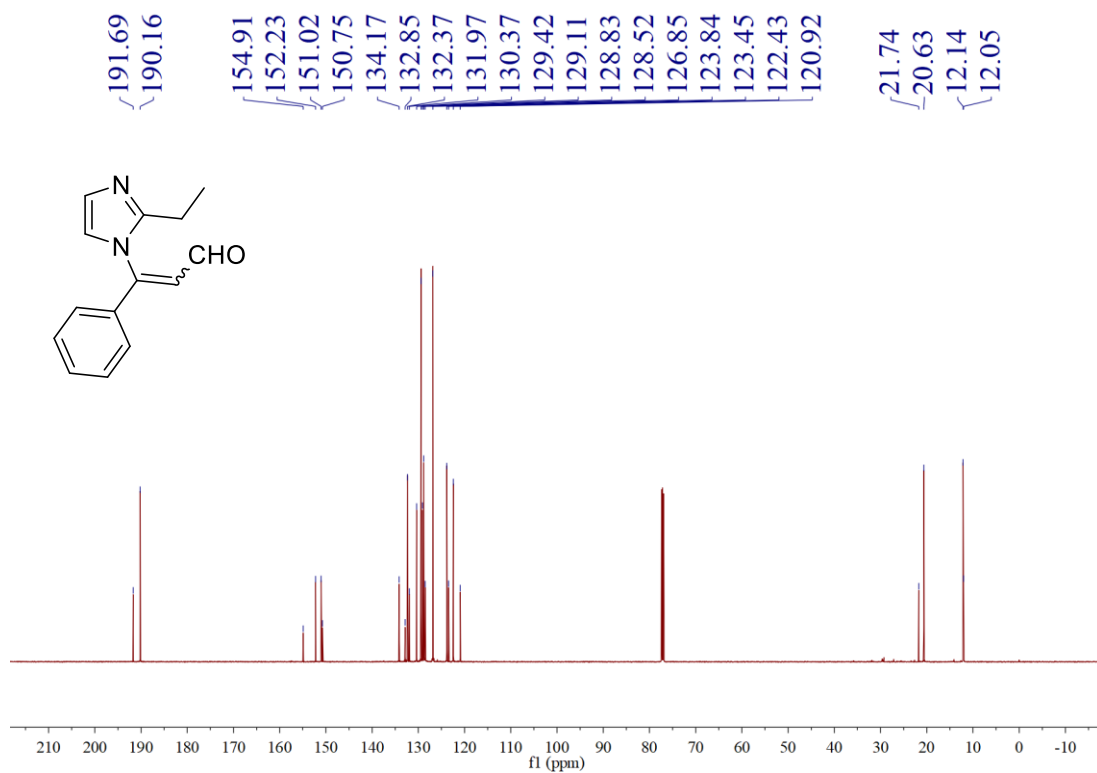

<sup>13</sup>C NMR spectrum of compound **4k**

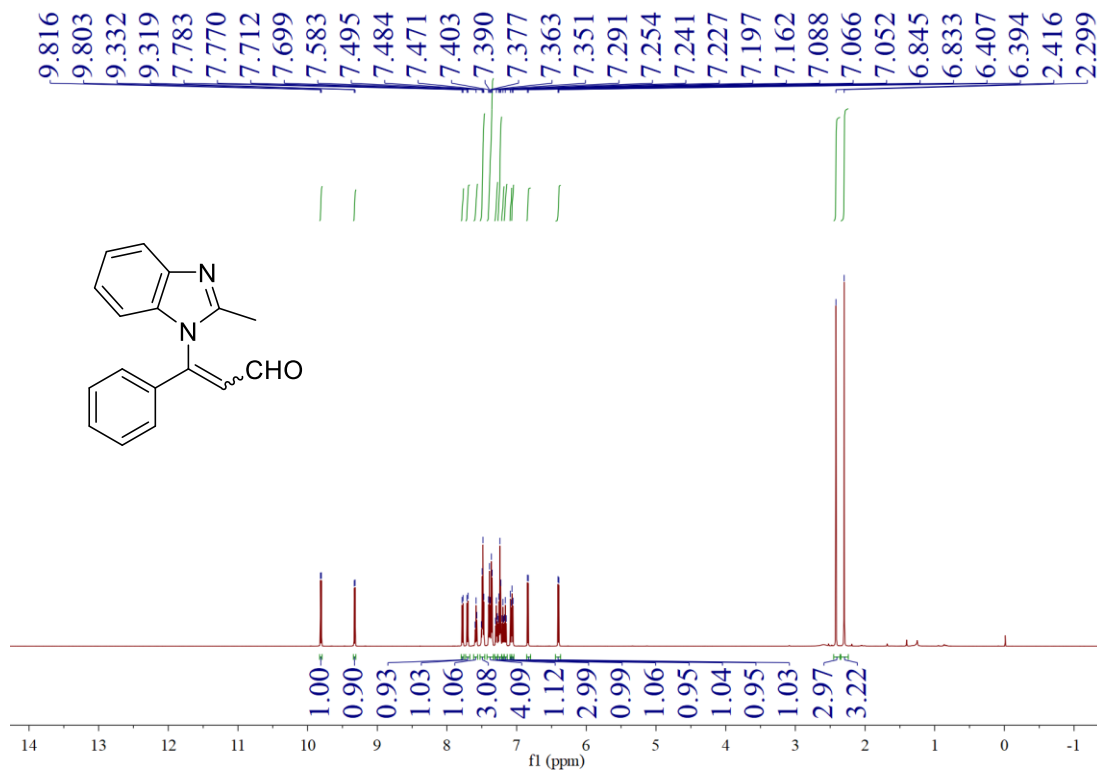

<sup>1</sup>H NMR spectrum of compound **3aa**

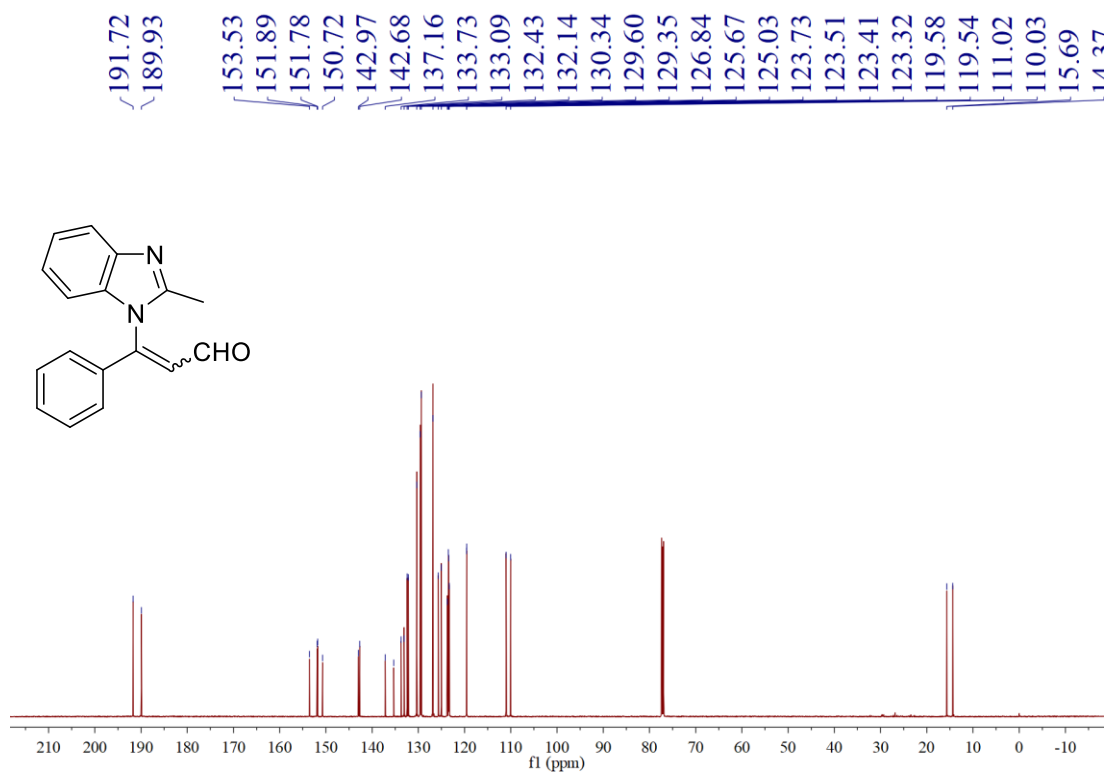

<sup>13</sup>C NMR spectrum of compound **3aa**

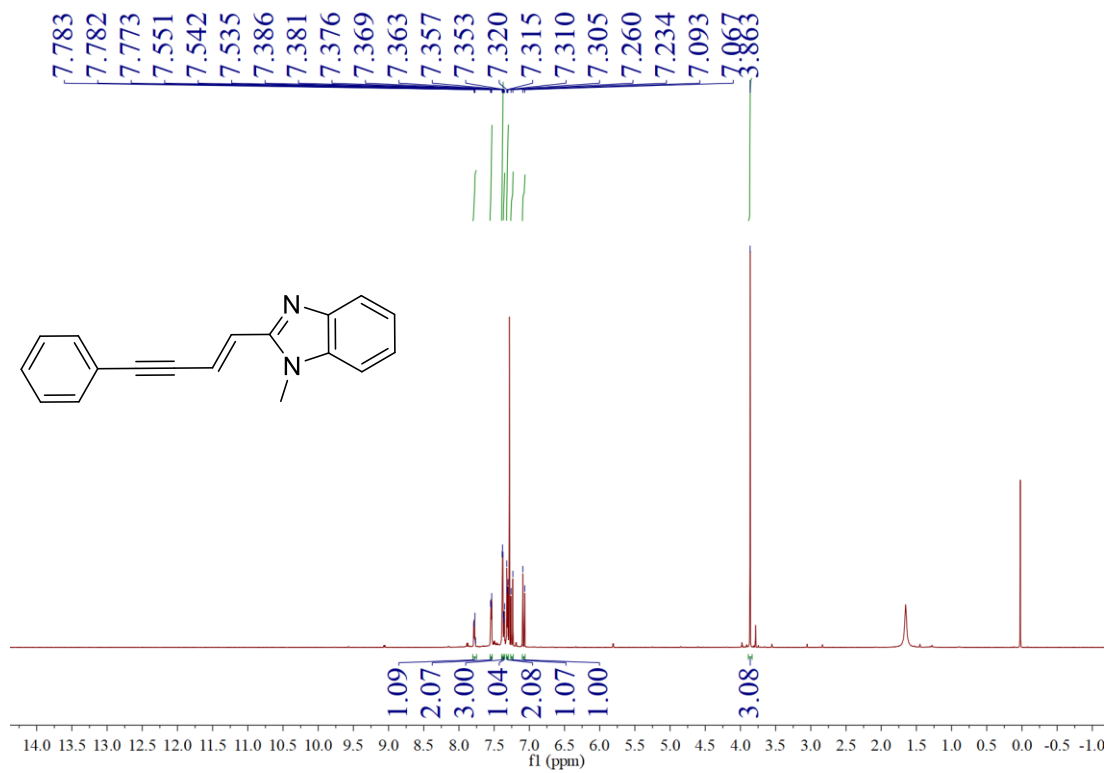

<sup>1</sup>H NMR spectrum of compound **3ab**

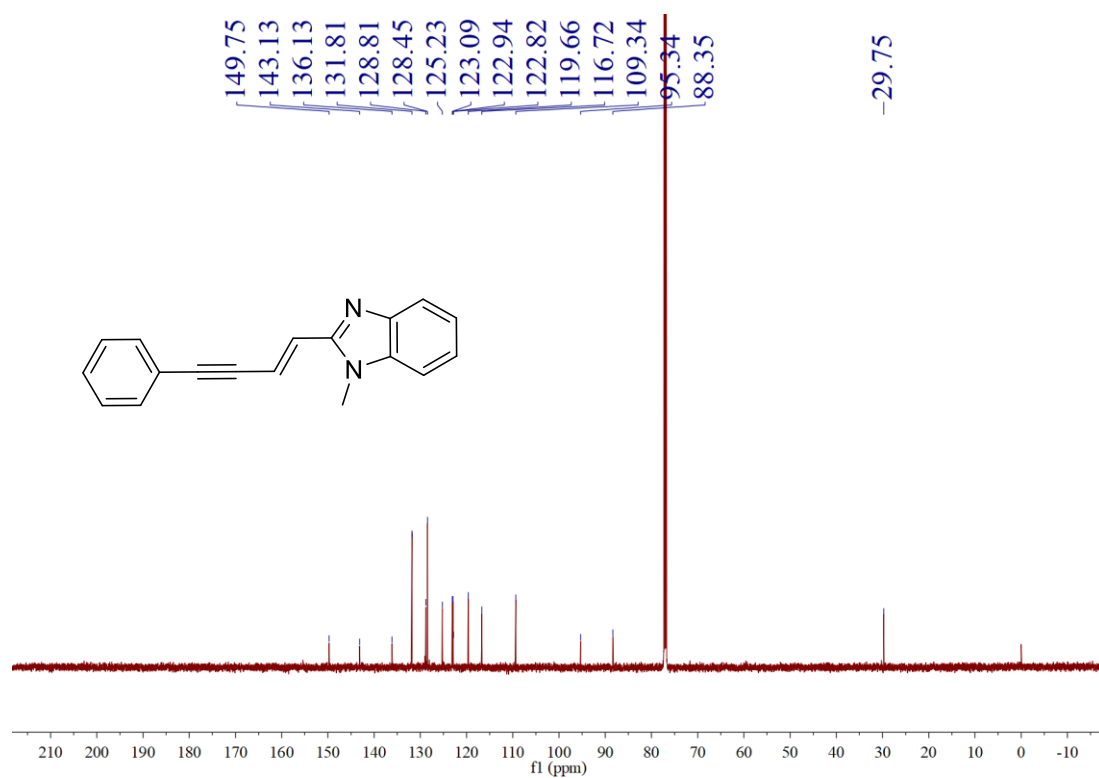

<sup>13</sup>C NMR spectrum of compound **3ab**

## References

- [1] D. Obermayer, D. Znidar, G. Glotz, A. Stadler, D. Dallinger, C. O. Kappe, *J. Org. Chem.*, 2016, **81**, 11788.
- [2] H. Qin, Y.-Y. Miao, J. Xu, Q.-R. Bi, W. Qu, W.-Y. Liu, F. Feng, H.-P. Sun, *Org. Chem. Front.*, 2019, **6**, 205.
- [3] Y.-F. Zhao, L.-B. Xu, F.-L. Kong, L. Yu, *Chem. Eng. J.*, 2021, **416**, 129090.
- [4] C. Pherkkhontod, V. Ervithayasuporn, S. Chanmungkalakul, C. Wang, X. G. Liu, D. J. Harding, S. Kiatkamjornwong, *Sens. Actuators, B*, 2021, **330**, 129287.
- [5] W.-M. Wan, D. Tian, Y.-N. Jing, X.-Y. Zhang, W. Wu, H. Ren, H.-L. Bao, *Angew. Chem., Int. Ed.*, 2018, **57**, 15510.
- [6] B.-W. Wang, K. Jiang, J.-X. Li, S.-H. Luo, Z.-Y. Wang, H.-F. Jiang, *Angew. Chem., Int. Ed.*, 2020, **59**, 2338.
- [7] Y.-C. Wu, J.-P. Huo, L. Cao, S. Ding, L.-Y. Wang, D.-R. Cao, Z.-Y. Wang, *Sens. Actuators, B*, 2016, **237**, 865.
- [8] K. Jiang, S.-H. Luo, C.-M. Pang, B.-W. Wang, H.-Q. Wu, Z.-Y. Wang, *Dyes Pigm.*, 2019, **162**, 367.
- [9] K. Jiang, S.-H. Chen, S.-H. Luo, C.-M. Pang, X.-Y. Wu, Z.-Y. Wang, *Dyes Pigm.*, 2019, **167**, 164.
- [10] S.-H. Chen, K. Jiang, J.-Y. Lin, K. Yang, X.-Y. Cao, X.-Y. Luo, Z.-Y. Wang, *J. Mater. Chem. C*, 2020, **8**, 8257.
- [11] M. Gupta, H. Lee, *ACS Appl. Mater. Interfaces*, 2018, **10**, 41717.
- [12] S.-L. Yi, Z. Lu, Z.-H. Xie, L.-X. Hou, *Talanta*, 2020, **208**, 120372.
- [13] Y.-P. Zhuang, J.-Y. Yao, Z.-Y. Zhuang, C.-J. Ni, H.-M. Yao, D.-L. Su, J. Zhou, Z.-J. Zhao, *Dyes Pigm.*, 2020, **174**, 108041.
- [14] K. Li, R.-H. Yu, C.-M. Shi, F.-R. Tao, T.-D. Li, Y.-Z. Cui, *Sens. Actuators, B*, 2018, **262**, 637.
- [15] Z.-J. Luo, B. Liu, S.-F. Si, Y.-J. Lin, C.-S. Luo, C.-J. Pan, C. Zhao, L. Wang, *Dyes Pigm.*, 2017, **143**, 463.
- [16] X.-D. Yu, J.-B. Guo, P. Peng, F.-J. Shen, Y.-J. Li, L.-J. Geng, T. Wang, *Appl. Surf. Sci.*, 2019, **487**, 473.
- [17] W.-Y. Dong, Q.-H. Ma, Z.-H. Ma, Q. Duan, X.-L. Lu, N.-N. Qiu, T. Fei, Z.-M. Su, *Dyes Pigm.*, 2020, **172**, 107799.
